# Supplementary material for: Lynronne antimicrobial peptides with terminal D amino acid enantiomers synergize with bedaquiline against Mycobacterium tuberculosis
Source: Research Square preprint supplement (doi:10.21203/rs.3.rs-4642869/v1), 2024-09-16
Supplement: Supplementary file 1 [file a23e30ee264d2dc7979895cf.xlsx]

## Sheet: Supplementary Tables List
List of Supplementary Tables
Supplementary Table 1 (Table S1): Information of AMPs used in this article
Supplementary Table 2 (Table S2): Minimum Inhibitory Concentrations (µg/ml) of N- And C-terminal modified peptides (D-amino acid substitutions)
Supplementary Table 3 (Table S3): Susceptibility of Mtb H37Rv Mc26206 to Rifampicin, Isoniazid, and BDQ In single or in combinations with LYN1D Or LYN3D
Supplementary Table 4a (Table S4a): DEGs under all treatment conditions (Log fold change and P value were included for all identified DEGs under all conditions)
Supplementary Table 4b (Table S4b): DEGs under all treatment conditions (only identified DEGs of indicated conditions were labelled with Log fold change and P-value, others were labelled with NA)
Supplementary Table 5 (Table S5): Functional clustering of DEGs under BDQ, LYN1D, LYN3D, BDQ_LYN1D and BDQ_LYN3D
Supplementary Table 6 (Table S6): Significantly different expressed regulators and their regulated DEGs identified under the combination of BDQ+LYN1D or BDQ+LYN3D

## Sheet: Table S1
Supplementary Table 1 (Table S1): Information of AMPs used in this article
Name	Sequence	Length	Modification
lynronne-1 (LYN1)	LPRRNRWSKIWKKVVTVFS-NH2	19 AAs	C-terminal Amination
lynronne-2 (LYN2)	HLRRINKLLTRIGLYRHAFG-NH2	20 AAs	C-terminal Amination
lynronne-3 (LYN3)	NRFTARFRRTPWRLCLQFRQ-NH2	20 AAs	C-terminal Amination
lynronne-1D (LYN1D)	[d-LEU]PRRNRWSKIWKKVVTVF[d-SER] -NH2	19 AAs	C-terminal Amination
lynronne-2D (LYN2D)	[d-HIS]LRRINKLLTRIGLYRHAF[d-GLY] -NH2	20 AAs	C-terminal Amination
lynronne-3D (LYN3D)	[d-ASN]RFTARFRRTPWRLCLQFR[d-GLN] -NH2	20 AAs	C-terminal Amination
AAs: amino acids

## Sheet: Table S2
Supplementary Table 2 (Table S2): Minimum Inhibitory Concentrations (µg/ml) of N- And C-terminal modified peptides (D-amino acid substitutions)​: Bold font with down arrows indicate improved MICs where MIC values are lower in the D-enantiomer versions. A. baumannii, K. penumoniae, E. coli and S. typhimurum MICs reduced by 4-fold in LYN1D and LYN2D compared to their linear counterparts. '-' not te…
Pathogens	LYN1	LYN1D	LYN2	LYN2D	LYN3	LYN3D	Vancomycin	Ciprofloxacin	Polymyxin B	Levofloxacin	Tobramycin
Mycobacterium tuberculosis H37Rv mc26206	50	10↓	50	50	50	10↓	-	-	-	-	-
Escherichia coli K12	32	8↓	64	8↓	64	32	>32	0.06	0.5	0.06	2
Pseudomonas aeruginosa PA01​	32	8↓	128	32↓	32	64	>32	0.5	1	0.25	0.5
Salmonella typhimurium​ SL1344	32	8↓	32	16	64	64	>32	-	4	0.06​	4​
Bacillus cereus​	32​	32	256​	256	128​	128	-	-	>32	0.12​	2​
Listeria monocytogenes NCTC 11994​	32​	32	32	64	32	64	-	-	-	-	-
Acinetobacter baumannii ATCC 19606	4	1↓	4	1	8	2	64	0.12	>32	1	0.25
Acinetobacter baumannii OXA-23 OXA-50	8	2↓	8	2	64	16	64	0.25	>32	1	0.25
Klebsiella pneumoniae CTX-M	16	4↓	64	8	64	8	128	16	4	16	16
Methicilin sensitive Staphylococcus aureus (MSSA) RN4220	32	16	32	128	32	128	64	0.12	>32	1	0.25
Epidemic Methicilin resistant Staphylococcus aureus (MRSA) EMRSA-15	16	8	64	256	64	64	2	>256	>32	16	0.25
Methicilin resistant Staphylococcus aureus (MRSA) ATCC 33591	16	16	128	256	64	64	4	-	>32	0.5	>32
Methicilin resistant Staphylococcus aureus (MRSA) USA300	8	16	256	128	64	64	2	-	>32	2	>32
Campylobacter jejuni NCTC 11168​	4	4​	32	16​	256	128​	-	-	-	-	-
Campylobacter jejuni ATCC 33292​	4	4​	32	16​	64	64​	-	-	-	-	-

## Sheet: Table S3
Supplementary Table 3 (Table S3): Susceptibility of Mtb H37Rv Mc26206 to Rifampicin, Isoniazid, and BDQ in single or in combinations with LYN1D or LYN3D. Values were the average MIC of at least three biological replicates under single treatment or in combinations. FICI was calculated as described in the method section.
Drug A	Drug B	MICA in combination/ MICA in single	MICB in combination/ MICB in single	FICI (Fractional Inhibitory Concentration Index)
rifampicin	LYN1D	0.03/0.06	2.5/10	0.75
rifampicin	LYN3D	0.03/0.06	2.5/10	0.75
isoniazid	LYN1D	1/1	10/10	2
Isoniazid	LYN3D	1/1	10/10	2
BDQ	LYN1D	0.13/0.5	2.5/10	0.5
BDQ	LYN3D	0.13/0.5	2.5/10	0.5

## Sheet: Table S4a
Supplementary Table 4a (Table S4a): DEGs under all treatment conditions (Log fold change and P value are included for all identified DEGs under all conditions)
Locus	BDQ_logFC	LYN1D_logFC	LYN3D_logFC	LYN1D_BDQ_logFC	LYN3D_BDQ_logFC	Name	Product	Functional_Category	KEGG pathway ID	KEGG pathway name	BDQ_adj.P.Val	LYN1D_adj.P.Val	LYN1D_BDQ_adj.P.Val	LYN3D_adj.P.Val	LYN3D_BDQ_adj.P.Val
Rv0027	0.6753	0.5179	0.3992	1.411	1	Rv0027	Conserved hypothetical protein	conserved hypotheticals	NA	NA	0.0165	0.046	0.000127	0.0982	0.000426
Rv0028	0.5647	0.6156	0.4623	1.0446	1.2278	Rv0028	Conserved hypothetical protein	conserved hypotheticals	NA	NA	0.0165	0.00785	0.000457	0.0255	1.22e-05
Rv0040c	-1.0675	-0.8498	-0.784	-0.8952	-0.7133	mtc28	Secreted proline rich protein Mtc28 (proline rich 28 kDa antigen)	cell wall and cell processes	NA	NA	0.000233	0.000558	0.00181	0.000681	0.00102
Rv0054	-0.0549	0.7384	1.1101	-0.0305	0.3164	ssb	Single-strand binding protein Ssb (helix-destabilizing protein)	information pathways	mtu03030	DNA replication	0.894	0.0243	0.943	0.00147	0.259
Rv0056	-0.3074	0.685	1.0109	-0.0034	0.3241	rplI	50S ribosomal protein L9 RplI	information pathways	mtu03010	Ribosome	0.327	0.027	0.992	0.00189	0.221
Rv0062	-0.755	0.0373	-0.0036	-1.3086	-1.1634	celA1	Possible cellulase CelA1 (endoglucanase) (endo-1,4-beta-glucanase) (FI-cmcase) (carboxymethyl cellulase)	intermediary metabolism and respiration	mtu00500	Starch and sucrose metabolism	0.0124	0.904	0.00304	0.991	0.000314
Rv0064	1.0986	-0.1689	-0.6341	1.1892	0.9988	Rv0064	Probable conserved transmembrane protein	cell wall and cell processes	NA	NA	0.00266	0.625	0.00106	0.0337	0.00177
Rv0069c	-0.3792	-0.0455	-0.0673	-1.0367	-0.9553	sdaA	Probable L-serine dehydratase SdaA (L-serine deaminase) (SDH) (L-SD)	intermediary metabolism and respiration	mtu00260	Glycine, serine and threonine metabolism	0.122	0.862	0.00531	0.779	0.000513
Rv0083	-0.7353	-0.9569	-0.7876	-1.2757	-1.1804	Rv0083	Probable oxidoreductase	intermediary metabolism and respiration	NA	NA	0.0222	0.00289	0.00786	0.00674	0.000613
Rv0084	-0.6407	-0.7395	-0.6408	-1.3306	-1.107	hycD	Possible formate hydrogenlyase HycD (FHL)	intermediary metabolism and respiration	NA	NA	0.0848	0.032	0.0139	0.046	0.0041
Rv0087	-0.7618	-0.9087	-0.7475	-1.0931	-1.0335	hycE	Possible formate hydrogenase HycE (FHL)	intermediary metabolism and respiration	NA	NA	0.00606	0.000956	0.0035	0.00274	0.000349
Rv0095c	0.3575	0.5003	0.2998	1.5484	0.6708	Rv0095c	Conserved hypothetical protein	insertion seqs and phages	NA	NA	0.512	0.297	0.00579	0.526	0.135
Rv0100	-0.9019	-0.8643	-0.6749	-1.3667	-1.1934	Rv0100	Conserved hypothetical protein	conserved hypotheticals	NA	NA	0.102	0.0757	0.0297	0.141	0.0229
Rv0101	-0.8276	-1.1078	-1.1716	-1.2886	-1.1667	nrp	Probable peptide synthetase Nrp (peptide synthase)	lipid metabolism	NA	NA	0.000607	4.74e-05	1.69e-05	1.85e-05	7.42e-06
Rv0112	0.3134	1.5063	1.7409	0.9532	1.3942	gca	Possible GDP-mannose 4,6-dehydratase Gca (GDP-D-mannose dehydratase)	cell wall and cell processes	mtu00051	Fructose and mannose metabolism	0.367	0.000457	0.00926	7.39e-05	0.000232
Rv0113	0.4989	1.4796	1.6362	1.1457	1.3898	gmhA	Probable sedoheptulose-7-phosphate isomerase GmhA (phosphoheptose isomerase)	cell wall and cell processes	mtu00540	Lipopolysaccharide biosynthesis	0.178	0.000743	0.00768	0.000192	0.000438
Rv0114	0.4179	1.6419	1.8393	1.3228	1.2402	gmhB	Possible D-alpha,beta-D-heptose-1,7-biphosphate phosphatase GmhB (D-glycero-D-manno-heptose 7-phosphate kinase)	cell wall and cell processes	mtu00540	Lipopolysaccharide biosynthesis	0.312	0.000419	0.00576	9.66e-05	0.00177
Rv0115	0.6296	1.528	1.6209	1.1431	1.2008	hddA	Possible D-alpha-D-heptose-7-phosphate kinase HddA	cell wall and cell processes	mtu00540	Lipopolysaccharide biosynthesis	0.122	0.000891	0.0157	0.000374	0.00261
Rv0116c	0.7302	0.2992	0.1567	1.2849	1.0124	ldtA	Probable L,D-transpeptidase LdtA	cell wall and cell processes	NA	NA	0.00105	0.101	8.22e-06	0.365	1.51e-05
Rv0117	1.157	0.2973	0.3799	0.9083	1.1694	oxyS	Oxidative stress response regulatory protein OxyS	regulatory proteins	NA	NA	0.000529	0.265	0.00723	0.125	0.000143
Rv0118c	2.3448	0.1634	0.4052	2.1366	2.2166	oxcA	Probable oxalyl-CoA decarboxylase OxcA	intermediary metabolism and respiration	mtu00630	Glyoxylate and dicarboxylate metabolism	0.000503	0.764	0.000772	0.376	0.000195
Rv0119	1.2921	0.0649	0.2715	0.9871	1.046	fadD7	Probable fatty-acid-CoA ligase FadD7 (fatty-acid-CoA synthetase) (fatty-acid-CoA synthase)	lipid metabolism	NA	NA	0.00318	0.885	0.0293	0.46	0.00589
Rv0122	0.904	0.8303	0.5567	1.6421	1.2273	Rv0122	Hypothetical protein	conserved hypotheticals	NA	NA	0.00365	0.00508	4.45e-05	0.033	0.000125
Rv0147	0.5616	0.786	0.8192	1.0782	1.0639	Rv0147	Probable aldehyde dehydrogenase (NAD+) dependent	intermediary metabolism and respiration	mtu00010	Glycolysis / Gluconeogenesis	0.00345	0.000344	1.06e-05	0.000109	5.38e-06
Rv0165c	0.0341	0.8002	1.0524	0.2795	0.6169	mce1R	Probable transcriptional regulatory protein Mce1R (probably GntR-family)	regulatory proteins	NA	NA	0.911	0.00232	0.243	0.000147	0.0052
Rv0169	-0.5348	-0.2589	-0.321	-1.2709	-0.9361	mce1A	Mce-family protein Mce1A	virulence, detoxification, adaptation	mtu02010	ABC transporters	0.204	0.565	0.0129	0.409	0.0178
Rv0171	-0.7031	-0.5273	-0.589	-1.2483	-1.2799	mce1C	Mce-family protein Mce1C	virulence, detoxification, adaptation	mtu02010	ABC transporters	0.0751	0.17	0.00711	0.0993	0.00166
Rv0172	-0.6398	-0.5437	-0.6665	-1.3298	-1.1374	mce1D	Mce-family protein Mce1D	virulence, detoxification, adaptation	mtu02010	ABC transporters	0.0458	0.079	0.00114	0.025	0.000655
Rv0173	-0.6279	-0.3485	-0.557	-1.0268	-1.0196	lprK	Possible Mce-family lipoprotein LprK (Mce-family lipoprotein Mce1E)	cell wall and cell processes	mtu02010	ABC transporters	0.148	0.433	0.0365	0.157	0.0133
Rv0174	-0.5023	-0.5152	-0.6847	-1.0965	-1.0071	mce1F	Mce-family protein Mce1F	virulence, detoxification, adaptation	mtu02010	ABC transporters	0.1	0.0893	0.00199	0.0196	0.00127
Rv0179c	-1.0083	-0.3986	-0.5081	-0.6609	-0.5451	lprO	Possible lipoprotein LprO	cell wall and cell processes	NA	NA	7.21e-05	0.0257	0.00305	0.00464	0.00209
Rv0186	0.1783	-1.2005	-1.2238	0.088	-1.0776	bglS	Probable beta-glucosidase BglS (gentiobiase) (cellobiase) (beta-D-glucoside glucohydrolase)	intermediary metabolism and respiration	mtu00460	Cyanoamino acid metabolism	0.73	0.0149	0.862	0.00884	0.0124
Rv0186A	1.0474	0.3131	-0.9262	2.1324	0.1836	mymT	Metallothionein, MymT	virulence, detoxification, adaptation	NA	NA	0.0278	0.505	0.000201	0.0306	0.653
Rv0188	1.3549	0.3048	-0.038	1.6311	1.3602	Rv0188	Probable conserved transmembrane protein	cell wall and cell processes	NA	NA	7.92e-05	0.208	9.9e-06	0.88	1.22e-05
Rv0211	0.994	0.0098	-0.0711	1.5224	1.4999	pckA	Probable iron-regulated phosphoenolpyruvate carboxykinase [GTP] PckA (phosphoenolpyruvate carboxylase) (PEPCK)(pep carboxykinase)	intermediary metabolism and respiration	mtu00010	Glycolysis / Gluconeogenesis	0.001	0.97	1.06e-05	0.782	6.99e-06
Rv0225	-0.3028	-0.5018	-0.5198	-0.6205	-1.1862	Rv0225	Possible conserved protein	cell wall and cell processes	NA	NA	0.347	0.0851	0.128	0.0614	0.000899
Rv0226c	-0.3698	-0.5048	-0.3168	-1.782	-0.9505	Rv0226c	Probable conserved transmembrane protein	cell wall and cell processes	NA	NA	0.405	0.192	0.00347	0.394	0.0231
Rv0236c	-0.5254	-0.6724	-0.5159	-1.0132	-0.8014	aftD	Possible arabinofuranosyltransferase AftD	cell wall and cell processes	mtu00571	Lipoarabinomannan (LAM) biosynthesis	0.018	0.00363	0.000826	0.0115	0.000438
Rv0244c	1.1937	0.6479	1.1451	1.7357	1.8713	fadE5	Probable acyl-CoA dehydrogenase FadE5	lipid metabolism	NA	NA	0.0293	0.204	0.00253	0.0233	0.00096
Rv0251c	2.9815	1.6446	0.176	2.4753	2.0073	hsp	Heat shock protein Hsp (heat-stress-induced ribosome-binding protein A)	virulence, detoxification, adaptation	NA	NA	0.0126	0.114	0.0189	0.866	0.0348
Rv0258c	0.5446	0.339	0.1198	1.0406	0.9961	Rv0258c	Conserved hypothetical protein	conserved hypotheticals	NA	NA	0.172	0.383	0.0229	0.767	0.00772
Rv0260c	-1.7585	-1.3873	-1.8159	-0.9668	-1.8201	Rv0260c	Possible transcriptional regulatory protein	regulatory proteins	mtu00860	Porphyrin metabolism	0.0067	0.0125	0.0896	0.00212	0.00177
Rv0262c	0.8134	0.584	0.7253	0.8399	1.058	aac	Aminoglycoside 2'-N-acetyltransferase Aac (Aac(2')-IC)	virulence, detoxification, adaptation	NA	NA	0.0176	0.0612	0.0338	0.0174	0.0014
Rv0263c	0.6029	0.9842	0.9171	1.0099	1.1305	Rv0263c	Conserved hypothetical protein	conserved hypotheticals	NA	NA	0.0135	0.000363	0.000846	0.000378	3.86e-05
Rv0264c	0.8433	1.4899	1.37	1.2756	1.7125	Rv0264c	Conserved hypothetical protein	conserved hypotheticals	NA	NA	0.0207	0.000347	0.0034	0.000399	3.45e-05
Rv0270	0.8167	0.4961	0.6156	1.0567	1.0837	fadD2	Probable fatty-acid-CoA ligase FadD2 (fatty-acid-CoA synthetase) (fatty-acid-CoA synthase)	lipid metabolism	NA	NA	0.00269	0.0422	0.000262	0.00966	8.51e-05
Rv0274	0.6479	0.1113	-0.3494	1.0137	0.5054	Rv0274	Conserved protein	conserved hypotheticals	NA	NA	0.0137	0.677	0.0012	0.127	0.0263
Rv0275c	0.7665	0.0781	-0.2451	1.02	0.6381	Rv0275c	Possible transcriptional regulatory protein (possibly TetR-family)	regulatory proteins	NA	NA	0.00296	0.762	0.000288	0.245	0.00403
Rv0283	1.0507	-0.0761	0.0743	0.3068	0.3018	eccB3	ESX conserved component EccB3. ESX-3 type VII secretion system protein. Possible membrane protein.	cell wall and cell processes	NA	NA	0.000241	0.751	0.135	0.73	0.102
Rv0303	-0.227	-0.4009	-0.2318	-0.6999	-1.0261	Rv0303	Probable dehydrogenase/reductase	intermediary metabolism and respiration	NA	NA	0.511	0.188	0.102	0.428	0.00353
Rv0306	1.4277	1.7849	1.8208	1.9525	2.067	Rv0306	Putative oxidoreductase	intermediary metabolism and respiration	mtu00740	Riboflavin metabolism	0.00057	6.04e-05	4.82e-05	3.02e-05	5.38e-06
Rv0307c	0.8871	1.0837	0.8941	1.56	1.3217	Rv0307c	Unknown protein	conserved hypotheticals	NA	NA	0.00554	0.000956	0.000119	0.0028	8.54e-05
Rv0311	1.2314	0.3705	-0.2052	1.9684	1.7203	Rv0311	Unknown protein	conserved hypotheticals	NA	NA	0.000352	0.168	6.31e-06	0.44	4.71e-06
Rv0312	-1.0103	-0.8374	-0.7865	-0.791	-0.7211	Rv0312	Conserved hypothetical proline and threonine rich protein	conserved hypotheticals	NA	NA	0.00288	0.00758	0.0288	0.00684	0.00988
Rv0336	0.7317	0.8193	0.8189	1.1818	1.2674	Rv0336	Conserved 13E12 repeat family protein	insertion seqs and phages	NA	NA	0.000347	0.000113	3.78e-06	5.23e-05	3.87e-07
Rv0341	-0.6266	-1.4832	-0.5098	0.0914	-0.2077	iniB	Isoniazid inductible gene protein IniB	cell wall and cell processes	NA	NA	0.15	0.0031	0.87	0.185	0.598
Rv0344c	-0.7383	-0.3993	-0.7332	-0.6296	-1.0994	lpqJ	Probable lipoprotein LpqJ	cell wall and cell processes	NA	NA	0.0458	0.208	0.148	0.0225	0.00347
Rv0358	-0.4149	-0.6084	-0.394	-0.5828	-1.4583	Rv0358	Conserved protein	conserved hypotheticals	NA	NA	0.415	0.176	0.246	0.357	0.00371
Rv0367c	0.3949	0.6108	0.281	1.4569	0.7252	Rv0367c	Hypothetical protein	conserved hypotheticals	NA	NA	0.304	0.077	0.00128	0.404	0.0302
Rv0370c	-0.5437	-0.7742	-1.0099	-0.9684	-0.843	Rv0370c	Possible oxidoreductase	intermediary metabolism and respiration	NA	NA	0.301	0.0991	0.0804	0.0322	0.0743
Rv0378	-0.9361	-0.4648	-1.1432	-0.3065	-0.6533	Rv0378	Conserved hypothetical glycine rich protein	conserved hypotheticals	NA	NA	0.0677	0.299	0.554	0.0147	0.134
Rv0390	0.3743	0.8413	1.336	0.2931	0.888	Rv0390	Conserved protein	conserved hypotheticals	NA	NA	0.199	0.00463	0.418	7.24e-05	0.00189
Rv0396	-0.4017	-0.4746	-0.3208	-1.7801	-1.5164	Rv0396	Hypothetical protein	conserved hypotheticals	NA	NA	0.57	0.451	0.00881	0.594	0.0128
Rv0405	-0.3333	-0.4882	-0.6446	-0.6771	-1.002	pks6	Probable membrane bound polyketide synthase Pks6	lipid metabolism	NA	NA	0.0617	0.00881	0.0029	0.000881	1.32e-05
Rv0421c	-0.4545	-0.3771	-1.0474	-2.0292	-1.0239	Rv0421c	Conserved hypothetical protein	conserved hypotheticals	NA	NA	0.421	0.464	0.00573	0.0364	0.0511
Rv0430	-0.9898	-0.4404	-0.5238	-1.0948	-0.9087	Rv0430	Conserved hypothetical protein	conserved hypotheticals	NA	NA	0.000347	0.0313	0.000513	0.00911	0.000153
Rv0440	-0.2427	-0.4879	-0.901	-1.0599	-1.7663	groEL2	60 kDa chaperonin 2 GroEL2 (protein CPN60-2) (GroEL protein 2) (65 kDa antigen) (heat shock protein 65) (cell wall protein A) (antigen A)	virulence, detoxification, adaptation	mtu03018	RNA degradation	0.681	0.375	0.0399	0.0707	0.00175
Rv0447c	0.4975	0.7482	1.1089	0.6077	0.7415	ufaA1	Probable cyclopropane-fatty-acyl-phospholipid synthase UfaA1 (cyclopropane fatty acid synthase) (CFA synthase)	lipid metabolism	NA	NA	0.161	0.0292	0.124	0.00207	0.0211
Rv0448c	0.8429	1.0067	1.4116	1.1127	1.0979	Rv0448c	Conserved hypothetical protein	conserved hypotheticals	NA	NA	0.167	0.079	0.0926	0.0145	0.0447
Rv0449c	1.3821	1.3471	1.9547	1.327	1.3938	Rv0449c	Conserved hypothetical protein	conserved hypotheticals	NA	NA	0.00912	0.0087	0.0159	0.000466	0.00398
Rv0459	-0.3282	-0.4159	-0.4125	-1.1723	-0.6843	Rv0459	Conserved hypothetical protein	conserved hypotheticals	NA	NA	0.141	0.0497	0.00145	0.0393	0.00287
Rv0467	1.5241	1.0861	1.2375	2.2813	2.4573	icl1	Isocitrate lyase Icl (isocitrase) (isocitratase)	intermediary metabolism and respiration	mtu00630	Glyoxylate and dicarboxylate metabolism	0.00113	0.00912	2.09e-05	0.00264	6.43e-06
Rv0468	0.9733	0.4516	0.6586	1.3873	1.6037	fadB2	3-hydroxybutyryl-CoA dehydrogenase FadB2 (beta-hydroxybutyryl-CoA dehydrogenase) (BHBD)	lipid metabolism	mtu00360	Phenylalanine metabolism	0.00141	0.0809	4.22e-05	0.0106	5.38e-06
Rv0499	-0.4229	-0.3757	-0.5749	-1.4052	-0.7238	Rv0499	Conserved hypothetical protein	conserved hypotheticals	NA	NA	0.539	0.546	0.0424	0.307	0.221
Rv0503c	-0.0445	0.8979	1.0982	0.6501	0.868	cmaA2	Cyclopropane-fatty-acyl-phospholipid synthase 2 CmaA2 (cyclopropane fatty acid synthase) (CFA synthase) (cyclopropane mycolic acid synthase 2) (mycolic acid trans-cyclopropane synthetase)	lipid metabolism	NA	NA	0.879	0.000956	0.00679	9.92e-05	0.000365
Rv0515	0.9208	1.0572	1.0516	1.246	1.5066	Rv0515	Conserved 13E12 repeat family protein	insertion seqs and phages	NA	NA	3.52e-05	1.01e-05	1.66e-06	4.95e-06	8.09e-08
Rv0516c	0.8781	1.2336	1.2263	1.3258	1.8011	Rv0516c	Possible anti-anti-sigma factor	information pathways	NA	NA	0.000351	2.56e-05	6.62e-06	1.11e-05	1.21e-07
Rv0528	-0.3394	-1.0803	-1.2279	-0.8625	-0.9838	Rv0528	Probable conserved transmembrane protein	cell wall and cell processes	NA	NA	0.356	0.00551	0.0666	0.00166	0.00636
Rv0532	-0.1266	-0.3961	-0.3405	-1.3018	-0.461	PE_PGRS6	PE-PGRS family protein PE_PGRS6	PE/PPE	NA	NA	0.694	0.136	0.00264	0.176	0.0816
Rv0549c	1.3521	0.6385	0.3829	1.333	1.2722	vapC3	Possible toxin VapC3	virulence, detoxification, adaptation	NA	NA	0.000616	0.0465	0.00136	0.2	0.00032
Rv0550c	1.1653	0.4556	0.0763	1.9307	0.851	vapB3	Possible antitoxin VapB3	virulence, detoxification, adaptation	NA	NA	0.029	0.381	0.00147	0.888	0.0712
Rv0553	-0.3389	-0.4718	-0.4532	-1.2369	-0.411	menC	Probable muconate cycloisomerase MenC (cis,cis-muconate lactonizing enzyme) (MLE)	intermediary metabolism and respiration	mtu00130	Ubiquinone and other terpenoid-quinone biosynthesis	0.353	0.137	0.0059	0.136	0.197
Rv0560c	1.6759	0.4709	0.4394	1.5139	1.0228	Rv0560c	Possible benzoquinone methyltransferase (methylase)	intermediary metabolism and respiration	NA	NA	5.74e-06	0.046	2.51e-05	0.0463	0.000152
Rv0563	1.6424	0.5525	0.2582	1.3752	0.8961	htpX	Probable protease transmembrane protein heat shock protein HtpX	virulence, detoxification, adaptation	NA	NA	0.00137	0.178	0.00339	0.507	0.0192
Rv0564c	1.2896	0.2034	-0.1013	0.4894	0.3704	gpdA1	Probable glycerol-3-phosphate dehydrogenase [NAD(P)+] GpdA1 (NAD(P)H-dependent glycerol-3-phosphate dehydrogenase) (NAD(P)H-dependent dihydroxyacetone-phosphate reductase)	lipid metabolism	mtu00564	Glycerophospholipid metabolism	0.0031	0.62	0.237	0.794	0.276
Rv0580c	1.0974	0.8769	0.9209	1.4565	1.5382	Rv0580c	Conserved protein	conserved hypotheticals	NA	NA	0.000347	0.00116	2.69e-05	0.000483	2.87e-06
Rv0592	0.0413	-0.3556	-0.344	-1.3283	-0.6063	mce2D	Mce-family protein Mce2D	virulence, detoxification, adaptation	mtu02010	ABC transporters	0.949	0.474	0.0356	0.452	0.207
Rv0600c	-0.2587	-0.1439	0.1253	-0.0168	-1.1839	Rv0600c	Two component sensor kinase [second part]	regulatory proteins	NA	NA	0.674	0.802	0.98	0.814	0.0197
Rv0608	0.0502	0.2579	-0.1676	1.0392	0.328	vapB28	Possible antitoxin VapB28	virulence, detoxification, adaptation	NA	NA	0.861	0.234	0.000457	0.426	0.102
Rv0609	0.1412	0.6983	0.2321	1.0227	0.3368	vapC28	Possible toxin VapC28. Contains PIN domain.	virulence, detoxification, adaptation	NA	NA	0.655	0.0131	0.00308	0.366	0.183
Rv0614	-0.6124	-0.4085	-0.5395	-2.2138	-0.9535	Rv0614	Conserved hypothetical protein	conserved hypotheticals	NA	NA	0.344	0.487	0.00314	0.318	0.1
Rv0618	0.0201	-0.5961	-0.6941	-0.3188	-1.3047	galTa	Probable galactose-1-phosphate uridylyltransferase GalTa [first part]	intermediary metabolism and respiration	NA	NA	0.964	0.0752	0.467	0.0348	0.00161
Rv0623	0.5019	0.2623	0.0005	1.0799	0.0921	vapB30	Possible antitoxin VapB30	virulence, detoxification, adaptation	NA	NA	0.225	0.528	0.0231	0.999	0.823
Rv0651	-0.3701	0.8617	1.3074	-0.4852	0.203	rplJ	50S ribosomal protein L10 RplJ	information pathways	mtu03010	Ribosome	0.352	0.0242	0.302	0.00145	0.554
Rv0652	-0.2216	0.8592	1.1682	-0.2887	0.2877	rplL	50S ribosomal protein L7/L12 RplL (SA1)	information pathways	mtu03010	Ribosome	0.619	0.0344	0.569	0.00482	0.424
Rv0653c	0.0458	0.736	1.0549	0.0004	0.1516	Rv0653c	Possible transcriptional regulatory protein (probably TetR-family)	regulatory proteins	NA	NA	0.914	0.0234	0.999	0.00189	0.621
Rv0656c	0.2669	0.6127	1.1983	0.3581	0.2049	vapC6	Possible toxin VapC6	virulence, detoxification, adaptation	NA	NA	0.377	0.0285	0.323	0.000218	0.447
Rv0670	1.047	0.0991	-0.4305	1.2509	1.0937	end	Probable endonuclease IV End (endodeoxyribonuclease IV) (apurinase)	information pathways	mtu03410	Base excision repair	0.00112	0.744	0.00021	0.084	0.000218
Rv0678	0.4354	0.3926	0.6878	1.2087	1.0853	Rv0678	Conserved protein	conserved hypotheticals	NA	NA	0.102	0.131	0.000282	0.00865	0.000193
Rv0690c	-0.2138	-0.7543	-0.7805	-1.0709	-0.8021	Rv0690c	Conserved hypothetical protein	conserved hypotheticals	NA	NA	0.389	0.00373	0.00354	0.00202	0.00161
Rv0695	-0.414	-0.6905	-0.8375	-1.03	-1.0758	Rv0695	Conserved hypothetical protein	conserved hypotheticals	NA	NA	0.0921	0.00665	0.00601	0.00136	0.00022
Rv0696	-0.8647	-0.7805	-0.9516	-1.804	-1.688	Rv0696	Probable membrane sugar transferase	intermediary metabolism and respiration	NA	NA	0.0319	0.0316	0.0038	0.00911	0.000341
Rv0697	-0.4285	-0.7702	-1.0873	-1.8509	-1.1936	Rv0697	Probable dehydrogenase	intermediary metabolism and respiration	NA	NA	0.475	0.142	0.00697	0.0389	0.0349
Rv0698	-0.7919	-0.3919	-0.2452	-0.8098	-1.3174	Rv0698	Conserved hypothetical protein	conserved hypotheticals	NA	NA	0.0176	0.149	0.0335	0.348	0.000355
Rv0700	-0.6154	-0.0216	0.3467	-1.186	-0.7171	rpsJ	30S ribosomal protein S10 RpsJ (transcription antitermination factor NusE)	information pathways	mtu03010	Ribosome	0.0243	0.945	0.000282	0.152	0.00444
Rv0701	-0.6949	-0.1261	0.2368	-1.2814	-0.9025	rplC	50S ribosomal protein L3 RplC	information pathways	mtu03010	Ribosome	0.0568	0.752	0.00326	0.483	0.00809
Rv0702	-0.6622	-0.0486	0.3188	-1.3775	-1.0655	rplD	50S ribosomal protein L4 RplD	information pathways	mtu03010	Ribosome	0.0737	0.911	0.00199	0.347	0.00337
Rv0703	-0.6329	-0.0435	0.2748	-1.1476	-0.8205	rplW	50S ribosomal protein L23 RplW	information pathways	mtu03010	Ribosome	0.0536	0.908	0.00508	0.352	0.00773
Rv0704	-0.513	0.1369	0.4621	-1.0118	-0.7335	rplB	50S ribosomal protein L2 RplB	information pathways	mtu03010	Ribosome	0.194	0.755	0.0163	0.202	0.0383
Rv0705	-0.4958	-0.0074	0.1803	-1.2926	-0.9178	rpsS	30S ribosomal protein S19 RpsS	information pathways	mtu03010	Ribosome	0.119	0.98	0.00373	0.545	0.00401
Rv0706	-0.5002	0.0496	0.3454	-1.3185	-0.9559	rplV	50S ribosomal protein L22 RplV	information pathways	mtu03010	Ribosome	0.142	0.897	0.00649	0.254	0.005
Rv0707	-0.4215	0.1718	0.4745	-1.2046	-0.7911	rpsC	30S ribosomal protein S3 RpsC	information pathways	mtu03010	Ribosome	0.212	0.635	0.00781	0.119	0.0136
Rv0714	-0.876	-0.2906	-0.1434	-1.0938	-0.9147	rplN	50S ribosomal protein L14 RplN	information pathways	mtu03010	Ribosome	0.00165	0.222	0.000421	0.53	0.000376
Rv0715	-0.6275	-0.1112	0.0602	-1.4521	-0.8316	rplX	50S ribosomal protein L24 RplX	information pathways	mtu03010	Ribosome	0.0137	0.666	0.00016	0.802	0.000917
Rv0726c	0.5055	1.1861	1.2833	1.0432	1.108	Rv0726c	Possible S-adenosylmethionine-dependent methyltransferase	lipid metabolism	NA	NA	0.0658	0.000401	0.00116	0.000106	0.000197
Rv0743c	0.7739	0.7294	0.4145	1.2909	0.7058	Rv0743c	Hypothetical protein	conserved hypotheticals	NA	NA	0.0121	0.0128	0.000664	0.113	0.0104
Rv0744c	0.9987	1.0153	0.4491	1.9551	1.0626	Rv0744c	Possible transcriptional regulatory protein	regulatory proteins	NA	NA	0.0121	0.00851	8.81e-05	0.187	0.00388
Rv0754	1.1164	-0.2137	-0.5474	1.2614	0.514	PE_PGRS11	PE-PGRS family protein PE_PGRS11	PE/PPE	NA	NA	0.0241	0.675	0.0189	0.213	0.222
Rv0757	0.6394	0.208	-0.0113	1.1543	0.7899	phoP	Possible two component system response transcriptional positive regulator PhoP	regulatory proteins	NA	NA	0.0455	0.526	0.0013	0.974	0.00727
Rv0762c	1.0535	0.3732	0.1062	1.0612	0.6984	Rv0762c	Conserved hypothetical protein	conserved hypotheticals	NA	NA	0.0121	0.34	0.0237	0.794	0.0534
Rv0763c	1.6077	0.5347	0.7349	1.9046	1.0647	Rv0763c	Possible ferredoxin	intermediary metabolism and respiration	NA	NA	0.00137	0.204	0.000398	0.066	0.0106
Rv0768	-1.6574	-1.1433	-0.5587	-1.0148	-2.2712	aldA	Probable aldehyde dehydrogenase NAD dependent AldA (aldehyde dehydrogenase [NAD+])	intermediary metabolism and respiration	mtu00010	Glycolysis / Gluconeogenesis	0.103	0.236	0.348	0.543	0.0208
Rv0771	0.03	0.1704	1.0287	-0.1682	-0.4685	Rv0771	Possible 4-carboxymuconolactone decarboxylase (CMD)	intermediary metabolism and respiration	mtu00362	Benzoate degradation	0.967	0.77	0.82	0.0349	0.39
Rv0772	-0.3879	-0.128	-0.1208	-1.0194	-0.6214	purD	Probable phosphoribosylamine--glycine ligase PurD (GARS) (glycinamide ribonucleotide synthetase) (phosphoribosylglycinamide synthetase) (5'-phosphoribosylglycinamide synthetase)	intermediary metabolism and respiration	mtu00230	Purine metabolism	0.139	0.628	0.00665	0.614	0.0145
Rv0779c	-0.6949	-0.1357	-0.1051	-1.3785	-0.5155	Rv0779c	Possible conserved transmembrane protein	cell wall and cell processes	NA	NA	0.195	0.795	0.0249	0.829	0.278
Rv0785	-0.371	-0.2212	-0.2513	-1.1635	-0.523	Rv0785	Conserved protein	conserved hypotheticals	NA	NA	0.174	0.394	0.00493	0.29	0.0382
Rv0791c	-0.8377	-1.1074	-0.4371	-1.0932	-1.6812	Rv0791c	Conserved protein	conserved hypotheticals	NA	NA	0.357	0.209	0.237	0.606	0.0409
Rv0792c	-0.7958	-1.2344	-0.4454	-0.8046	-1.503	Rv0792c	Probable transcriptional regulatory protein (probably GntR-family)	regulatory proteins	NA	NA	0.347	0.132	0.339	0.571	0.0464
Rv0804	-0.2472	-0.7074	-0.6859	-1.3858	-0.9991	Rv0804	Conserved hypothetical protein	conserved hypotheticals	NA	NA	0.694	0.177	0.0267	0.173	0.0634
Rv0807	-0.0985	0.1284	-0.3299	1.0775	0.5217	Rv0807	Conserved hypothetical protein	conserved hypotheticals	NA	NA	0.823	0.725	0.00793	0.303	0.0908
Rv0821c	0.7832	0.7327	0.8163	1.3355	1.2718	phoY2	Probable phosphate-transport system transcriptional regulatory protein PhoY2	cell wall and cell processes	NA	NA	0.000351	0.000527	1.85e-06	0.000114	9.31e-07
Rv0827c	-0.1688	0.2455	-0.4826	1.223	0.0879	kmtR	Metal sensor transcriptional regulator KmtR (ArsR-SmtB family)	regulatory proteins	NA	NA	0.722	0.54	0.00857	0.186	0.824
Rv0833	0.0388	-0.848	-0.6365	-1.3242	-0.3226	PE_PGRS13	PE-PGRS family protein PE_PGRS13	PE/PPE	NA	NA	0.924	0.0127	0.00962	0.0364	0.283
Rv0838	0.000531995	0.1182	-0.072	-1.0429	0.0887	lpqR	Probable conserved lipoprotein LpqR	cell wall and cell processes	mtu01502	Vancomycin resistance	0.999	0.747	0.026	0.833	0.795
Rv0848	-0.2445	-1.0345	-0.9018	-0.5376	-1.3	cysK2	Possible cysteine synthase a CysK2 (O-acetylserine sulfhydrylase) (O-acetylserine (thiol)-lyase) (CSASE)	intermediary metabolism and respiration	mtu00270	Cysteine and methionine metabolism	0.601	0.0221	0.278	0.0294	0.00438
Rv0873	0.5927	0.5929	0.6507	1.0377	1.0935	fadE10	Probable acyl-CoA dehydrogenase FadE10	lipid metabolism	NA	NA	0.00456	0.00518	3.56e-05	0.00159	9.67e-06
Rv0880	-0.5666	-0.248	-0.571	-1.7462	-1.0985	Rv0880	Possible transcriptional regulatory protein (possibly MarR-family)	regulatory proteins	NA	NA	0.367	0.681	0.0274	0.282	0.0632
Rv0881	-0.4838	0.0087	0.1714	-1.209	-0.5993	Rv0881	Possible rRNA methyltransferase (rRNA methylase)	intermediary metabolism and respiration	NA	NA	0.0695	0.97	0.00148	0.44	0.0166
Rv0885	-1.5756	-1.2281	-0.6877	-0.9596	-0.8722	Rv0885	Conserved hypothetical protein	conserved hypotheticals	NA	NA	0.00392	0.0162	0.0428	0.113	0.0394
Rv0886	-1.1268	-0.6097	-0.079	-0.6399	-0.3484	fprB	Probable NADPH:adrenodoxin oxidoreductase FprB (adrenodoxin reductase) (AR) (ferredoxin-NADP(+) reductase)	intermediary metabolism and respiration	NA	NA	0.00592	0.079	0.138	0.823	0.269
Rv0890c	-0.5306	-0.542	-0.6412	-1.0696	-1.1983	Rv0890c	Probable transcriptional regulatory protein (probably LuxR-family)	regulatory proteins	NA	NA	0.0458	0.0321	0.00469	0.0101	0.000125
Rv0891c	-0.7551	-0.635	-0.4594	-1.1278	-0.8916	Rv0891c	Possible transcriptional regulatory protein	regulatory proteins	NA	NA	0.0235	0.0376	0.00977	0.0997	0.00454
Rv0892	-0.555	-1.0354	-0.8069	-1.0778	-1.4693	Rv0892	Probable monooxygenase	intermediary metabolism and respiration	NA	NA	0.134	0.0084	0.0316	0.0206	0.000664
Rv0898c	1.1865	0.608	0.1968	2.1559	1.577	Rv0898c	Conserved hypothetical protein	conserved hypotheticals	NA	NA	0.00166	0.0583	1.06e-05	0.532	4.81e-05
Rv0924c	-0.6936	-0.4655	-0.3596	-1.1094	-0.9534	mntH	Divalent cation-transport integral membrane protein MntH (BRAMP) (MRAMP)	cell wall and cell processes	NA	NA	0.0241	0.0799	0.00785	0.15	0.00208
Rv0942	0.5739	0.1831	0.1029	1.2932	0.4617	Rv0942	Hypothetical protein	conserved hypotheticals	NA	NA	0.0671	0.568	0.000983	0.74	0.0969
Rv0967	0.8943	0.1753	-0.7232	1.9884	0.181	csoR	Copper-sensitive operon repressor CsoR	regulatory proteins	NA	NA	0.0773	0.749	0.000942	0.113	0.692
Rv0968	1.1673	0.4308	-0.5949	2.1795	0.552	Rv0968	Conserved protein	conserved hypotheticals	NA	NA	0.0121	0.309	0.000142	0.135	0.143
Rv0969	1.19	-0.1037	-0.309	0.8564	0.2613	ctpV	Probable metal cation transporter P-type ATPase CtpV	cell wall and cell processes	NA	NA	0.00416	0.799	0.0273	0.364	0.424
Rv0972c	0.5773	-1.2334	-1.113	0.3554	-0.2682	fadE12	Acyl-CoA dehydrogenase FadE12	lipid metabolism	NA	NA	0.198	0.013	0.512	0.0164	0.537
Rv0973c	0.7733	-1.1564	-0.9064	0.1056	-0.0179	accA2	Probable acetyl-/propionyl-coenzyme A carboxylase alpha chain (alpha subunit) AccA2: biotin carboxylase + biotin carboxyl carrier protein (BCCP)	lipid metabolism	mtu00280	Valine, leucine and isoleucine degradation	0.16	0.0483	0.898	0.09	0.976
Rv0974c	0.7849	-1.1389	-1.325	-0.4014	-0.3356	accD2	Probable acetyl-/propionyl-CoA carboxylase (beta subunit) AccD2	lipid metabolism	NA	NA	0.0872	0.0217	0.529	0.00841	0.451
Rv0975c	0.5351	-1.5758	-1.7866	-0.4677	-0.2413	fadE13	Probable acyl-CoA dehydrogenase FadE13	lipid metabolism	mtu00071	Fatty acid degradation	0.301	0.00822	0.489	0.00356	0.632
Rv0976c	0.2722	-1.3277	-1.3194	-0.1013	-0.5335	Rv0976c	Conserved hypothetical protein	conserved hypotheticals	NA	NA	0.654	0.0251	0.9	0.0205	0.315
Rv0981	0.8226	0.755	0.8932	1.4069	1.402	mprA	Mycobacterial persistence regulator MRPA (two component response transcriptional regulatory protein)	regulatory proteins	mtu02020	Two-component system	0.00117	0.00174	1.45e-05	0.000298	2.87e-06
Rv0982	0.9441	0.1833	-0.0383	1.1587	0.9778	mprB	Two component sensor kinase MprB	regulatory proteins	mtu02020	Two-component system	0.00174	0.505	0.000287	0.886	0.000413
Rv0983	1.1736	0.053	-0.1056	0.6369	0.4807	pepD	Probable serine protease PepD (serine proteinase) (MTB32B)	intermediary metabolism and respiration	mtu02020	Two-component system	0.000787	0.872	0.0257	0.712	0.0566
Rv0984	1.228	0.6471	0.6682	0.8597	0.9841	moaB2	Possible pterin-4-alpha-carbinolamine dehydratase MoaB2 (PHS) (4-alpha- hydroxy-tetrahydropterin dehydratase) (pterin-4-a-carbinolamine dehydratase) (phenylalanine hydroxylase-stimulating protein) (PHS) (pterin carbinolamine dehydratase) (PCD)	intermediary metabolism and respiration	NA	NA	0.000233	0.0124	0.00373	0.00668	0.00026
Rv0990c	-1.3316	-1.0314	-1.0336	-1.6161	-2.2412	Rv0990c	Hypothetical protein	conserved hypotheticals	NA	NA	0.0841	0.147	0.093	0.121	0.00631
Rv0991c	-1.2267	-0.9059	-1.2394	-0.8123	-1.8414	Rv0991c	Conserved serine rich protein	conserved hypotheticals	NA	NA	0.0751	0.173	0.226	0.0504	0.00671
Rv0997	0.5004	0.8738	0.679	0.7124	1.1331	Rv0997	Hypothetical protein	conserved hypotheticals	NA	NA	0.135	0.00964	0.0749	0.027	0.000897
Rv1008	-0.5738	-0.3043	-0.4047	-1.2404	-0.7583	tatD	Probable deoxyribonuclease TatD (YJJV protein)	cell wall and cell processes	NA	NA	0.0841	0.301	0.00573	0.144	0.0165
Rv1010	-0.3165	-0.3645	-0.514	-1.1018	-1.0401	ksgA	Probable dimethyladenosine transferase KsgA (S-adenosylmethionine-6-N', N'-adenosyl(rRNA) dimethyltransferase) (16S rRNA dimethylase) (high level kasugamycin resistance protein KsgA) (kasugamycin dimethyltransferase)	information pathways	NA	NA	0.178	0.0938	0.00301	0.0179	0.000231
Rv1024	-0.3273	-0.1912	-0.3881	-1.0808	-0.6753	Rv1024	Possible conserved membrane protein	cell wall and cell processes	NA	NA	0.201	0.439	0.00507	0.0858	0.00791
Rv1025	-0.5767	-0.4898	-0.5157	-1.7589	-0.8137	Rv1025	Conserved protein	conserved hypotheticals	NA	NA	0.277	0.295	0.00659	0.24	0.0876
Rv1026	-0.5284	-0.8807	-0.9361	-1.3378	-1.1938	Rv1026	Conserved protein	virulence, detoxification, adaptation	mtu00230	Purine metabolism	0.0446	0.00165	0.0013	0.000782	0.000153
Rv1029	0.622	0.884	0.6143	0.9766	1.2879	kdpA	Probable potassium-transporting ATPase a chain KdpA (potassium-translocating ATPase a chain) (ATP phosphohydrolase [potassium-transporting] a chain) (potassium binding and translocating subunit A)	cell wall and cell processes	mtu02020	Two-component system	0.0405	0.00508	0.00614	0.0253	0.000107
Rv1039c	-1.1046	-0.267	-0.4378	-1.5864	-1.2209	PPE15	PPE family protein PPE15	PE/PPE	NA	NA	0.0251	0.537	0.0136	0.253	0.00863
Rv1040c	-1.7723	-0.6409	-1.0205	-0.6606	-1.3758	PE8	PE family protein PE8	PE/PPE	NA	NA	0.0021	0.105	0.181	0.0141	0.00358
Rv1045	-0.7415	-0.8239	-1.0988	-0.9726	-1.1967	Rv1045	Hypothetical protein	conserved hypotheticals	NA	NA	0.0342	0.0165	0.0234	0.00207	0.00101
Rv1057	0.6007	0.7491	0.5371	1.2047	1.4117	Rv1057	Conserved hypothetical protein	conserved hypotheticals	NA	NA	0.114	0.0477	0.00563	0.118	0.000536
Rv1065	0.9002	1.1061	1.3518	1.2285	1.535	Rv1065	Conserved hypothetical protein	conserved hypotheticals	NA	NA	0.00312	0.00074	0.000265	7.24e-05	1.12e-05
Rv1068c	0.3556	-0.3728	-0.3157	-2.0254	-1.2928	PE_PGRS20	PE-PGRS family protein PE_PGRS20	PE/PPE	NA	NA	0.562	0.526	0.00227	0.565	0.0198
Rv1075c	0.2716	0.1687	-0.5009	1.2275	0.3494	Rv1075c	Conserved exported protein	cell wall and cell processes	NA	NA	0.501	0.671	0.00603	0.153	0.31
Rv1078	-0.6172	-0.2693	-0.1378	-1.0319	-0.7066	pra	Probable proline-rich antigen homolog Pra	conserved hypotheticals	NA	NA	0.00198	0.115	4.3e-05	0.394	0.000218
Rv1082	0.5498	0.3697	0.3332	1.0411	0.8437	mca	Mycothiol conjugate amidase Mca (mycothiol S-conjugate amidase)	virulence, detoxification, adaptation	NA	NA	0.0114	0.0665	0.000104	0.0741	0.000177
Rv1083	0.7732	0.1702	0.1345	1.037	0.8201	Rv1083	Conserved hypothetical protein	conserved hypotheticals	NA	NA	0.0121	0.578	0.0038	0.632	0.00385
Rv1120c	-0.2583	-0.1431	-0.2967	-0.1722	-1.1723	Rv1120c	Conserved hypothetical protein	conserved hypotheticals	NA	NA	0.655	0.79	0.776	0.532	0.0196
Rv1121	-0.2757	-0.8701	-1.0536	-0.9204	-0.9756	zwf1	Probable glucose-6-phosphate 1-dehydrogenase Zwf1 (G6PD)	intermediary metabolism and respiration	mtu00030	Pentose phosphate pathway	0.362	0.00588	0.0172	0.00113	0.00161
Rv1123c	-0.2556	-0.503	-0.4878	-1.0798	-0.7321	bpoB	Possible peroxidase BpoB (non-haem peroxidase)	virulence, detoxification, adaptation	NA	NA	0.319	0.0348	0.00409	0.0312	0.00444
Rv1128c	1.1507	1.2084	0.8985	1.8924	1.8149	Rv1128c	Conserved hypothetical protein	insertion seqs and phages	NA	NA	0.000633	0.000337	1.01e-05	0.00203	2.77e-06
Rv1129c	2.7033	2.9621	2.5976	3.5325	3.5584	Rv1129c	Probable transcriptional regulator protein	regulatory proteins	NA	NA	3.01e-06	4.22e-06	2.92e-07	3.47e-06	8.09e-08
Rv1130	2.4631	3.0725	2.6099	3.5227	3.557	prpD	Possible methylcitrate dehydratase PrpD	intermediary metabolism and respiration	mtu00640	Propanoate metabolism	1.39e-05	4.55e-06	3.63e-07	4.95e-06	1.21e-07
Rv1131	2.8473	3.1463	2.5315	3.7245	3.6404	prpC	Probable methylcitrate synthase PrpC	intermediary metabolism and respiration	mtu00020	Citrate cycle (TCA cycle)	1.39e-05	8.3e-06	1.04e-06	2.07e-05	3.59e-07
Rv1144	0.7553	1.3354	1.6354	1.1315	1.5591	Rv1144	Probable short-chain type dehydrogenase/reductase	intermediary metabolism and respiration	NA	NA	0.000653	7.48e-06	9.9e-06	5.2e-07	1.97e-07
Rv1158c	-1.0133	-0.4671	-0.4768	-0.9476	-0.5938	Rv1158c	Conserved hypothetical ala-, pro-rich protein	conserved hypotheticals	NA	NA	0.00707	0.138	0.0282	0.108	0.0494
Rv1159A	1.0339	0.1762	0.1639	1.3118	1.3561	Rv1159A	Unknown protein	conserved hypotheticals	mtu00790	Folate biosynthesis	0.00277	0.591	0.000959	0.583	0.000104
Rv1168c	-1.7324	-0.447	-0.5204	-1.8111	-1.9279	PPE17	PPE family protein PPE17	PE/PPE	NA	NA	0.0422	0.607	0.0316	0.49	0.0128
Rv1169c	-2.295	-0.8169	-0.886	-1.9699	-2.3974	lipX	PE family protein. Possible lipase LipX.	PE/PPE	NA	NA	0.0249	0.398	0.0442	0.304	0.00959
Rv1180	0.8979	1.8899	2.145	1.7786	2.1702	pks3	Probable polyketide beta-ketoacyl synthase Pks3	lipid metabolism	NA	NA	0.00655	2.99e-05	2.6e-05	4.95e-06	1.52e-06
Rv1181	0.7781	1.6935	1.8903	1.6131	1.9658	pks4	Probable polyketide beta-ketoacyl synthase Pks4	lipid metabolism	NA	NA	0.0193	0.000113	5.5e-05	2.19e-05	5.99e-06
Rv1182	0.4706	1.3598	1.3581	1.3296	1.5574	papA3	Probable conserved polyketide synthase associated protein PapA3	lipid metabolism	NA	NA	0.0903	0.000201	9.22e-05	8.41e-05	1.16e-05
Rv1184c	0.5587	1.0044	1.0473	1.2394	1.5418	Rv1184c	Possible exported protein	cell wall and cell processes	NA	NA	0.022	0.000475	3.93e-05	0.000168	2.77e-06
Rv1185c	0.4673	0.6091	0.7317	0.9116	1.1239	fadD21	Probable fatty-acid-AMP ligase FadD21 (fatty-acid-AMP synthetase) (fatty-acid-AMP synthase)	lipid metabolism	NA	NA	0.0773	0.0249	0.00136	0.00593	0.000135
Rv1194c	0.3156	0.862	0.9616	1.1338	1.2398	Rv1194c	Conserved protein	conserved hypotheticals	NA	NA	0.254	0.00488	0.000336	0.00136	8.4e-05
Rv1218c	-1.0884	-0.6687	-0.4166	-0.0855	-0.272	Rv1218c	Probable tetronasin-transport ATP-binding protein ABC transporter	cell wall and cell processes	NA	NA	0.0241	0.111	0.882	0.285	0.486
Rv1219c	-1.3188	-1.0914	-1.0504	-0.8233	-1.2811	Rv1219c	Probable transcriptional regulatory protein	regulatory proteins	NA	NA	0.00198	0.00457	0.0571	0.00371	0.000899
Rv1220c	-1.1058	-0.8071	-0.6955	-1.4485	-0.9881	Rv1220c	Probable methyltransferase	intermediary metabolism and respiration	NA	NA	0.00959	0.0243	0.00677	0.0366	0.00884
Rv1239c	0.5676	1.2046	1.269	1.2807	1.4667	corA	Possible magnesium and cobalt transport transmembrane protein CorA	cell wall and cell processes	NA	NA	0.103	0.00213	0.00207	0.000964	0.000168
Rv1252c	-1.4904	-0.6611	-0.7166	-2.388	-1.448	lprE	Probable lipoprotein LprE	cell wall and cell processes	NA	NA	0.0232	0.198	0.00698	0.142	0.0147
Rv1271c	-0.2478	-0.745	-0.4761	-1.1264	-0.7164	Rv1271c	Conserved hypothetical secreted protein	cell wall and cell processes	NA	NA	0.459	0.0182	0.0157	0.0904	0.0199
Rv1284	0.6343	1.7347	1.8244	1.7124	1.6689	canA	Beta-carbonic anhydrase	intermediary metabolism and respiration	mtu00910	Nitrogen metabolism	0.0915	0.000337	0.000351	0.000106	0.000123
Rv1286	0.8769	0.8141	0.8389	1.412	1.2459	cysN	Probable bifunctional enzyme CysN/CysC: sulfate adenyltransferase (subunit 1) + adenylylsulfate kinase	intermediary metabolism and respiration	mtu00230	Purine metabolism	0.00283	0.00509	2.72e-05	0.00238	4.96e-05
Rv1291c	-0.2454	-0.3602	0.0783	-1.7861	0.0857	Rv1291c	Conserved hypothetical secreted protein	cell wall and cell processes	NA	NA	0.674	0.48	0.00385	0.876	0.865
Rv1296	-0.8628	-0.829	-0.9026	-1.358	-1.5589	thrB	Probable homoserine kinase ThrB	intermediary metabolism and respiration	mtu00260	Glycine, serine and threonine metabolism	0.118	0.108	0.0752	0.0671	0.00727
Rv1344	0.0987	0.427	0.789	1.4165	1.0714	mbtL	Acyl carrier protein (ACP) MbtL	lipid metabolism	mtu01100	Metabolic pathways	0.88	0.384	0.0106	0.0754	0.0187
Rv1361c	-1.0003	-0.2449	0.0907	-0.9138	-0.8209	PPE19	PPE family protein PPE19	PE/PPE	NA	NA	0.0146	0.537	0.0364	0.811	0.0191
Rv1372	0.7643	-0.7323	-0.5086	1.1632	0.7492	Rv1372	Conserved hypothetical protein	conserved hypotheticals	NA	NA	0.00999	0.0136	0.00111	0.0552	0.00549
Rv1381	-0.1968	-0.6185	-0.4888	-1.4095	-0.8122	pyrC	Probable dihydroorotase PyrC (DHOase)	intermediary metabolism and respiration	mtu00240	Pyrimidine metabolism	0.46	0.0147	0.000785	0.0341	0.00253
Rv1395	1.0967	0.2202	0.0599	0.9967	0.4653	Rv1395	Transcriptional regulatory protein	regulatory proteins	NA	NA	0.016	0.634	0.0524	0.892	0.24
Rv1403c	-0.2973	0.1538	-0.5647	1.155	-0.363	Rv1403c	Putative methyltransferase	intermediary metabolism and respiration	NA	NA	0.391	0.647	0.00314	0.0591	0.232
Rv1405c	-1.0667	-0.41	-0.9196	0.2947	-1.2021	Rv1405c	Putative methyltransferase	intermediary metabolism and respiration	NA	NA	0.00619	0.204	0.44	0.00679	0.00137
Rv1411c	0.5651	0.5495	0.6518	0.9833	1.0324	lprG	Conserved lipoprotein LprG	cell wall and cell processes	mtu05152	Tuberculosis	0.0074	0.00892	6.87e-05	0.00189	1.86e-05
Rv1460	1.44	0.1811	-0.1885	1.7096	1.026	Rv1460	Probable transcriptional regulatory protein	regulatory proteins	NA	NA	0.0175	0.764	0.00699	0.736	0.0414
Rv1461	1.3944	0.1339	0.2844	1.4916	1.1861	Rv1461	Conserved protein	conserved hypotheticals	NA	NA	0.00122	0.734	0.000331	0.386	0.0012
Rv1462	2.0234	0.4732	0.4232	1.5022	1.3407	Rv1462	Conserved hypothetical protein	conserved hypotheticals	NA	NA	1.26e-06	0.0524	2.13e-05	0.0599	1.31e-05
Rv1463	2.0919	0.6876	0.5654	1.5047	1.5227	Rv1463	Probable conserved ATP-binding protein ABC transporter	cell wall and cell processes	NA	NA	1.26e-06	0.0111	2.72e-05	0.0206	6.99e-06
Rv1464	2.2836	0.5877	0.4017	1.6163	1.3657	csd	Probable cysteine desulfurase Csd	intermediary metabolism and respiration	mtu00450	Selenocompound metabolism	1.26e-06	0.0302	2.26e-05	0.101	2.72e-05
Rv1465	2.1321	0.2585	0.0886	1.4359	1.1018	Rv1465	Possible nitrogen fixation related protein	intermediary metabolism and respiration	NA	NA	3.52e-05	0.499	0.00162	0.818	0.00279
Rv1466	1.7392	0.3885	0.2836	1.557	1.4322	Rv1466	Conserved protein	conserved hypotheticals	NA	NA	6e-06	0.11	2.77e-05	0.218	1.02e-05
Rv1467c	1.1144	0.9861	1.03	1.2415	1.3974	fadE15	Probable acyl-CoA dehydrogenase FadE15	lipid metabolism	NA	NA	0.000347	0.00074	9.37e-05	0.000298	9.73e-06
Rv1477	-0.8943	-0.6666	-0.5627	-1.0171	-0.8046	ripA	Peptidoglycan hydrolase	virulence, detoxification, adaptation	NA	NA	0.000351	0.00232	0.000338	0.00464	0.00023
Rv1481	-0.1558	-0.7264	-0.7793	-0.9484	-1.0296	Rv1481	Probable membrane protein	cell wall and cell processes	NA	NA	0.539	0.00507	0.00397	0.00199	0.000186
Rv1486c	0.6481	0.8099	0.7698	1.0731	0.9694	Rv1486c	Conserved hypothetical protein	conserved hypotheticals	NA	NA	0.00146	0.000223	3.09e-05	0.000165	1.22e-05
Rv1487	0.6055	0.8074	0.6303	0.8915	1.246	Rv1487	Conserved membrane protein	cell wall and cell processes	NA	NA	0.0328	0.00518	0.00781	0.0151	7.94e-05
Rv1489	0.7373	0.6889	0.7515	1.1163	1.1366	Rv1489	Conserved protein	conserved hypotheticals	NA	NA	0.00116	0.00136	6.79e-05	0.000466	7.14e-06
Rv1524	-0.5832	-0.2435	-0.3882	-1.2084	-0.9119	Rv1524	Probable glycosyltransferase	intermediary metabolism and respiration	NA	NA	0.0848	0.441	0.0101	0.176	0.00671
Rv1525	-0.5394	-0.647	-0.6333	-1.1831	-0.65	wbbL2	Possible rhamnosyl transferase WbbL2	conserved hypotheticals	NA	NA	0.126	0.0463	0.00929	0.0404	0.0456
Rv1528c	-0.8716	-0.3931	-0.3504	-0.3497	-1.4645	papA4	Probable conserved polyketide synthase associated protein PapA4	lipid metabolism	NA	NA	0.251	0.572	0.713	0.585	0.0472
Rv1536	0.2554	0.8309	1.3662	0.4371	1.1086	ileS	Isoleucyl-tRNA synthetase IleS	information pathways	mtu00970	Aminoacyl-tRNA biosynthesis	0.52	0.034	0.232	0.00145	0.00319
Rv1545	-0.0393	-0.2405	-0.2136	-1.2852	-0.1491	Rv1545	Hypothetical protein	conserved hypotheticals	NA	NA	0.964	0.741	0.083	0.755	0.826
Rv1561	0.9736	0.7651	1.092	1.3983	1.2687	vapC11	Possible toxin VapC11	virulence, detoxification, adaptation	NA	NA	0.00862	0.0242	0.00133	0.00208	0.000514
Rv1566c	-1.0115	-0.2959	-0.3672	-0.7325	-0.4152	Rv1566c	Possible Inv protein	virulence, detoxification, adaptation	NA	NA	0.000351	0.152	0.00881	0.0606	0.0349
Rv1571	-0.0296	-0.5091	-0.2181	-0.335	-1.2858	Rv1571	Conserved protein	conserved hypotheticals	NA	NA	0.967	0.35	0.601	0.684	0.021
Rv1574	1.0152	-0.1353	-0.7642	0.86	0.9107	Rv1574	Probable PhiRv1 phage related protein	insertion seqs and phages	NA	NA	0.0247	0.78	0.0621	0.0734	0.0238
Rv1576c	1.6436	-1.5051	-1.7036	0.5511	0.5249	Rv1576c	Probable PhiRv1 phage protein	insertion seqs and phages	NA	NA	0.00704	0.0157	0.379	0.00643	0.278
Rv1577c	0.9346	-1.5129	-1.7567	0.4017	0.2291	Rv1577c	Probable PhiRv1 phage protein	insertion seqs and phages	NA	NA	0.0867	0.0131	0.506	0.00464	0.646
Rv1578c	2.2565	0.758	-0.3366	2.667	2.1872	Rv1578c	Probable PhiRv1 phage protein	insertion seqs and phages	NA	NA	0.000241	0.0998	3.56e-05	0.483	6.87e-05
Rv1579c	1.0544	0.2862	-0.0066	0.7548	0.4856	Rv1579c	Probable PhiRv1 phage protein	insertion seqs and phages	NA	NA	0.0477	0.608	0.173	0.992	0.32
Rv1582c	0.5506	-0.7042	-1.0071	-0.5715	-0.6237	Rv1582c	Probable PhiRv1 phage protein	insertion seqs and phages	NA	NA	0.249	0.131	0.375	0.0312	0.166
Rv1591	-0.8939	-1.022	-0.8444	-1.3047	-1.3973	Rv1591	Probable transmembrane protein	cell wall and cell processes	NA	NA	0.00348	0.00118	0.000899	0.00289	4.21e-05
Rv1592c	-1.0948	-1.2268	-1.0051	-1.323	-1.4989	Rv1592c	Conserved hypothetical protein	conserved hypotheticals	NA	NA	0.00191	0.00082	0.000395	0.00207	4.48e-05
Rv1593c	0.1838	-1.3538	-1.3606	-0.4394	-0.8515	Rv1593c	Conserved protein	conserved hypotheticals	NA	NA	0.685	0.00427	0.28	0.00246	0.0231
Rv1598c	0.5089	0.4743	0.4121	1.2634	1.1654	Rv1598c	Conserved protein	conserved hypotheticals	NA	NA	0.0268	0.0292	6.78e-05	0.0411	1.85e-05
Rv1608c	0.3185	0.9625	1.0589	0.828	1.1175	bcpB	Probable peroxidoxin BcpB	virulence, detoxification, adaptation	NA	NA	0.18	0.000498	0.00396	0.000129	4.99e-05
Rv1613	-0.0334	-0.5116	-0.5803	-1.4444	-1.2521	trpA	Probable tryptophan synthase, alpha subunit TrpA	intermediary metabolism and respiration	mtu00260	Glycine, serine and threonine metabolism	0.928	0.08	0.00259	0.0373	0.000312
Rv1614	-0.3593	-0.7489	-0.8045	-1.5205	-1.3702	lgt	Possible prolipoprotein diacylglyceryl transferases Lgt	cell wall and cell processes	NA	NA	0.181	0.00881	0.000177	0.00368	3.77e-05
Rv1617	0.251	0.8546	1.0001	0.4424	0.7331	pykA	Probable pyruvate kinase PykA	intermediary metabolism and respiration	mtu00010	Glycolysis / Gluconeogenesis	0.293	0.00155	0.0654	0.000253	0.00162
Rv1622c	1.5166	0.4998	0.6753	1.742	1.8155	cydB	Probable integral membrane cytochrome D ubiquinol oxidase (subunit II) CydB (cytochrome BD-I oxidase subunit II)	intermediary metabolism and respiration	mtu00190	Oxidative phosphorylation	0.000553	0.139	0.00014	0.037	3.03e-05
Rv1623c	1.3289	0.4463	0.4715	1.5997	1.6001	cydA	Probable integral membrane cytochrome D ubiquinol oxidase (subunit I) CydA (cytochrome BD-I oxidase subunit I)	intermediary metabolism and respiration	mtu00190	Oxidative phosphorylation	0.000846	0.163	8.73e-05	0.111	4.81e-05
Rv1624c	0.702	0.755	0.7665	1.1051	1.305	Rv1624c	Probable conserved membrane protein	cell wall and cell processes	NA	NA	0.00663	0.00339	0.000516	0.00202	1.29e-05
Rv1632c	-0.8901	-0.723	-0.6497	-0.8382	-1.1946	Rv1632c	Hypothetical protein	conserved hypotheticals	NA	NA	0.000846	0.002	0.00576	0.00292	2.76e-05
Rv1638A	0.4887	0.7208	0.7547	1.0129	1.1503	Rv1638A	Conserved hypothetical protein	conserved hypotheticals	NA	NA	0.0449	0.00527	0.000738	0.00234	4.38e-05
Rv1646	0.3106	0.7768	0.8312	0.8517	1.1236	PE17	PE family protein PE17	PE/PPE	NA	NA	0.139	0.00147	0.000716	0.000483	1.69e-05
Rv1650	-0.1116	-0.4947	-0.6315	-1.1676	-0.9624	pheT	Probable phenylalanyl-tRNA synthetase, beta chain PheT	information pathways	mtu00970	Aminoacyl-tRNA biosynthesis	0.653	0.0271	0.00106	0.0052	0.000231
Rv1653	1.0469	0.34	0.2351	0.1215	0.3781	argJ	Probable glutamate N-acetyltransferase ArgJ	intermediary metabolism and respiration	mtu00220	Arginine biosynthesis	0.00327	0.28	0.788	0.434	0.197
Rv1654	1.0386	0.0227	-0.2313	-0.1587	0.0471	argB	Probable acetylglutamate kinase ArgB	intermediary metabolism and respiration	mtu00220	Arginine biosynthesis	0.00375	0.95	0.732	0.461	0.89
Rv1655	1.2407	0.2878	0.2879	-0.0125	0.1296	argD	Probable acetylornithine aminotransferase ArgD	intermediary metabolism and respiration	mtu00220	Arginine biosynthesis	0.0012	0.383	0.98	0.342	0.695
Rv1662	0.124	-0.6801	-1.0752	-0.6248	-0.4763	pks8	Probable polyketide synthase Pks8	lipid metabolism	NA	NA	0.803	0.0947	0.276	0.0121	0.225
Rv1665	0.7012	0.7059	0.9212	1.2791	1.5009	pks11	Chalcone synthase Pks11	lipid metabolism	NA	NA	0.0458	0.0395	0.00186	0.00715	0.000131
Rv1666c	0.732	0.7354	1.1735	1.0602	1.2215	cyp139	Probable cytochrome P450 139 Cyp139	intermediary metabolism and respiration	NA	NA	0.0434	0.0335	0.00997	0.00153	0.000806
Rv1670	1.0613	0.5052	0.2591	1.0983	1.2114	Rv1670	Conserved hypothetical protein	conserved hypotheticals	NA	NA	0.0112	0.18	0.013	0.489	0.00214
Rv1678	-0.3186	-0.5072	-0.4108	-0.3474	-1.1096	Rv1678	Probable integral membrane protein	cell wall and cell processes	NA	NA	0.352	0.0942	0.42	0.152	0.00252
Rv1679	-0.5133	-0.2681	-0.4037	-1.2185	-0.6087	fadE16	Possible acyl-CoA dehydrogenase FadE16	lipid metabolism	NA	NA	0.0672	0.285	0.00259	0.0897	0.0199
Rv1684	-0.5292	-0.3552	-0.7407	-0.9428	-1.2376	Rv1684	Conserved hypothetical protein	conserved hypotheticals	NA	NA	0.292	0.434	0.0875	0.0828	0.0126
Rv1685c	-1.3521	-1.447	-1.2351	-1.4978	-2.3228	Rv1685c	Conserved hypothetical protein	conserved hypotheticals	NA	NA	0.0116	0.00551	0.0276	0.00869	0.000269
Rv1686c	-2.0863	-2.1926	-1.9299	-2.1873	-3.0314	Rv1686c	Probable conserved integral membrane protein ABC transporter	cell wall and cell processes	NA	NA	0.0443	0.0223	0.111	0.0287	0.0074
Rv1687c	-2.5027	-2.4769	-2.1146	-2.368	-3.2717	Rv1687c	Probable conserved ATP-binding protein ABC transporter	cell wall and cell processes	NA	NA	0.0233	0.0166	0.0798	0.0233	0.00414
Rv1690	-1.02	-0.9665	-0.994	-1.8104	-1.7187	lprJ	Probable lipoprotein LprJ	cell wall and cell processes	NA	NA	0.0351	0.0234	0.004	0.0164	0.00129
Rv1706A	-0.1064	-1.5968	-1.5891	0.3814	-0.8887	Rv1706A	Conserved hypothetical protein	conserved hypotheticals	NA	NA	0.844	0.00211	0.476	0.00187	0.0402
Rv1709	-0.5374	-0.6026	-0.6383	-1.2142	-1.1322	scpA	Possible segregation and condensation protein ScpA	cell wall and cell processes	NA	NA	0.0398	0.0165	0.0029	0.00869	0.000189
Rv1712	-0.1856	-0.6774	-0.6717	-1.0061	-1.0375	cmk	Cytidylate kinase Cmk (CMP kinase) (cytidine monophosphate kinase) (ck)	intermediary metabolism and respiration	mtu00240	Pyrimidine metabolism	0.616	0.0372	0.0267	0.031	0.00459
Rv1713	-0.352	-0.6666	-0.6362	-0.5429	-1.0984	engA	Probable GTP-binding protein EngA	intermediary metabolism and respiration	NA	NA	0.426	0.0939	0.329	0.0926	0.0123
Rv1719	-0.1825	0.2704	-0.1668	-0.5306	-1.0244	Rv1719	Probable transcriptional regulatory protein	regulatory proteins	NA	NA	0.766	0.611	0.345	0.752	0.0445
Rv1723	-0.1839	-0.0445	-0.2789	-1.2467	-0.6847	Rv1723	Probable hydrolase	intermediary metabolism and respiration	NA	NA	0.601	0.897	0.00407	0.324	0.0292
Rv1754c	-0.9164	-0.4532	-0.3485	-1.0902	-0.7041	Rv1754c	Conserved protein	conserved hypotheticals	NA	NA	0.000233	0.0136	0.00016	0.0348	0.000371
Rv1761c	0.3231	1.0067	1.0783	0.9158	1.1773	Rv1761c	Possible exported protein	cell wall and cell processes	NA	NA	0.446	0.00958	0.0381	0.00468	0.00219
Rv1772	0.1915	0.3637	0.3659	0.7564	1.0009	Rv1772	Hypothetical protein	conserved hypotheticals	NA	NA	0.532	0.183	0.0216	0.15	0.000669
Rv1773c	0.1576	0.8271	1.1064	0.6255	1.1735	Rv1773c	Probable transcriptional regulatory protein	regulatory proteins	NA	NA	0.637	0.00662	0.0769	0.000532	0.000232
Rv1783	1.0359	0.9969	0.8712	1.1012	1.1909	eccC5	ESX conserved component EccC5. ESX-5 type VII secretion system protein.	cell wall and cell processes	NA	NA	3.35e-05	4.21e-05	6.31e-06	5.77e-05	1.52e-06
Rv1790	0.9226	2.4555	2.8182	1.9509	2.293	PPE27	PPE family protein PPE27	PE/PPE	NA	NA	0.0641	0.000113	0.00121	2.19e-05	6.74e-05
Rv1791	0.7922	1.2906	1.3269	1.7399	1.5336	PE19	PE family protein PE19	PE/PPE	NA	NA	0.00416	0.000134	4.01e-06	4.47e-05	5.73e-06
Rv1792	0.5435	0.8725	0.9914	1.0521	1.1693	esxM	ESAT-6 like protein EsxM	cell wall and cell processes	NA	NA	0.00717	0.000282	2.69e-05	4.32e-05	4.71e-06
Rv1794	0.3663	0.9707	1.1472	0.7552	0.8597	Rv1794	Conserved protein	conserved hypotheticals	NA	NA	0.109	0.000529	0.00225	6.85e-05	0.000399
Rv1795	0.3696	0.9808	1.1004	0.6812	0.8231	eccD5	ESX conserved component EccD5. ESX-5 type VII secretion system protein. Probable membrane protein.	cell wall and cell processes	NA	NA	0.0796	0.00026	0.00364	4.32e-05	0.000269
Rv1799	0.5035	0.2417	0.1718	0.7918	1.0296	lppT	Probable lipoprotein LppT	cell wall and cell processes	NA	NA	0.369	0.668	0.167	0.753	0.0336
Rv1808	0.5513	1.1729	1.1389	0.8306	1.313	PPE32	PPE family protein PPE32	PE/PPE	NA	NA	0.272	0.0183	0.129	0.0153	0.00569
Rv1809	0.7276	1.563	1.2698	1.3829	1.6541	PPE33	PPE family protein PPE33	PE/PPE	NA	NA	0.0198	7.25e-05	0.000307	0.000211	1.11e-05
Rv1815	-1.0328	-0.1631	-0.0062	-0.7449	-0.6963	Rv1815	Conserved protein	conserved hypotheticals	NA	NA	0.000433	0.477	0.0122	0.98	0.00245
Rv1846c	0.7784	0.1639	-0.0284	1.1454	1.074	blaI	Transcriptional repressor BlaI	regulatory proteins	mtu01501	beta-Lactam resistance	0.00311	0.509	0.000124	0.908	8.02e-05
Rv1854c	0.3903	-0.0067	-0.3025	1.0795	0.588	ndh	Probable NADH dehydrogenase Ndh	intermediary metabolism and respiration	mtu00190	Oxidative phosphorylation	0.122	0.978	0.000295	0.188	0.0113
Rv1880c	0.4309	0.3726	0.1968	1.0363	0.8551	cyp140	Probable cytochrome P450 140 Cyp140	intermediary metabolism and respiration	NA	NA	0.0444	0.0726	9.37e-05	0.304	0.000192
Rv1884c	-1.3529	-0.3955	-0.3055	-1.0397	-1.0626	rpfC	Probable resuscitation-promoting factor RpfC	cell wall and cell processes	NA	NA	3.89e-05	0.0723	0.000777	0.131	7.06e-05
Rv1885c	0.0802	0.8243	1.0156	0.2228	0.537	Rv1885c	Chorismate mutase	intermediary metabolism and respiration	mtu00400	Phenylalanine, tyrosine and tryptophan biosynthesis	0.738	0.000832	0.312	7.87e-05	0.00646
Rv1907c	1.6398	1.2197	1.3899	1.8423	1.7641	Rv1907c	Hypothetical protein	conserved hypotheticals	NA	NA	0.000233	0.00127	7.45e-05	0.000298	2.05e-05
Rv1908c	1.6935	1.228	1.1901	1.7164	1.759	katG	Catalase-peroxidase-peroxynitritase T KatG	virulence, detoxification, adaptation	mtu00360	Phenylalanine metabolism	9.13e-06	0.000172	3.48e-06	9.66e-05	1.4e-06
Rv1909c	1.8296	1.2852	0.9014	2.4409	2.062	furA	Ferric uptake regulation protein FurA (fur)	regulatory proteins	NA	NA	0.00024	0.00193	1.01e-05	0.0111	1.31e-05
Rv1910c	0.5403	0.802	0.6969	0.9725	1.0425	Rv1910c	Probable exported protein	cell wall and cell processes	NA	NA	0.083	0.00979	0.00923	0.0159	0.000938
Rv1929c	-0.1931	-0.9912	-1.0081	-0.396	-0.4807	Rv1929c	Conserved hypothetical protein	conserved hypotheticals	NA	NA	0.48	0.000945	0.213	0.000576	0.0437
Rv1940	1.1096	-0.0256	-0.3455	0.0966	0.0513	ribA1	Probable riboflavin biosynthesis protein RibA1 (GTP cyclohydrolase II)	intermediary metabolism and respiration	mtu00740	Riboflavin metabolism	0.0332	0.963	0.887	0.49	0.927
Rv1943c	0.7699	0.6868	0.6347	1.113	0.7223	mazE5	Possible antitoxin MazE5	virulence, detoxification, adaptation	NA	NA	0.0176	0.0235	0.00381	0.0261	0.0132
Rv1954c	2.4888	1.5569	1.3045	3.0445	2.7057	Rv1954c	Hypothetical protein	conserved hypotheticals	NA	NA	1.26e-06	0.000113	2.92e-07	0.000211	1.45e-07
Rv1955	1.7306	1.4454	1.1776	2.5852	2.0182	higB	Possible toxin HigB	virulence, detoxification, adaptation	NA	NA	0.000341	0.00082	6.24e-06	0.00212	1.49e-05
Rv1956	1.2759	1.2227	1.1397	1.7132	1.4455	higA	Possible antitoxin HigA	virulence, detoxification, adaptation	NA	NA	0.000347	0.00035	2.39e-05	0.000353	2.31e-05
Rv1957	0.8969	0.9889	1.0231	1.5479	1.1083	Rv1957	Hypothetical protein	conserved hypotheticals	NA	NA	0.00348	0.00165	5.17e-05	0.000814	0.000247
Rv1958c	0.6298	0.8391	0.8664	1.2307	0.9404	Rv1958c	Hypothetical protein	conserved hypotheticals	NA	NA	0.0859	0.0207	0.00452	0.0127	0.00671
Rv1959c	0.8646	1.3323	1.4356	1.7101	1.3722	parE1	Possible toxin ParE1	virulence, detoxification, adaptation	NA	NA	0.00141	3.15e-05	6.24e-06	9.14e-06	6.99e-06
Rv1960c	0.9214	0.9189	0.8294	1.5436	1.3779	parD1	Possible antitoxin ParD1	virulence, detoxification, adaptation	NA	NA	0.00663	0.00533	0.000282	0.00676	0.000104
Rv1968	1.603	0.0784	-0.4031	0.7591	0.4321	mce3C	Mce-family protein Mce3C	virulence, detoxification, adaptation	mtu02010	ABC transporters	0.00725	0.906	0.184	0.468	0.414
Rv1978	0.2525	0.8606	0.9597	1.0099	1.2275	Rv1978	Conserved protein	conserved hypotheticals	NA	NA	0.308	0.00138	0.000895	0.00037	2.31e-05
Rv1986	-0.0144	0.9115	1.253	0.4163	0.6722	Rv1986	Probable conserved integral membrane protein	cell wall and cell processes	NA	NA	0.967	0.0035	0.206	0.000168	0.0115
Rv1990c	0.4942	0.9642	0.7353	1.7737	1.1731	Rv1990c	Probable transcriptional regulatory protein	regulatory proteins	NA	NA	0.0718	0.00148	1.15e-05	0.0059	0.000116
Rv1991A	0.9145	0.2684	-0.1185	1.6961	0.8192	mazE6	Antitoxin MazE6	virulence, detoxification, adaptation	NA	NA	0.00277	0.314	2.6e-05	0.663	0.00259
Rv1991c	0.4716	0.4307	0.2244	1.156	0.6739	mazF6	Toxin MazF6	virulence, detoxification, adaptation	NA	NA	0.0612	0.0686	0.000444	0.317	0.00486
Rv1993c	0.693	-0.1634	-0.3467	1.2239	0.1466	Rv1993c	Conserved protein	conserved hypotheticals	NA	NA	0.0379	0.641	0.00271	0.252	0.647
Rv1996	-0.0334	-1.0351	-0.9658	-0.2951	-0.3907	Rv1996	Universal stress protein family protein	virulence, detoxification, adaptation	NA	NA	0.957	0.0381	0.535	0.0357	0.355
Rv1999c	0.0422	-0.2511	0.4744	-2.5542	-0.355	Rv1999c	Probable conserved integral membrane protein	cell wall and cell processes	NA	NA	0.957	0.687	0.00207	0.368	0.546
Rv2000	-0.0307	1.0579	1.1896	0.6584	1.0086	Rv2000	Unknown protein	conserved hypotheticals	NA	NA	0.939	0.00183	0.0566	0.000466	0.00116
Rv2018	0.5011	1.0788	1.0911	0.8322	0.967	Rv2018	Conserved protein	conserved hypotheticals	NA	NA	0.0698	0.000684	0.00923	0.000381	0.000664
Rv2025c	-0.019	1.3981	0.0064	2.1188	0.2524	Rv2025c	Conserved membrane protein	cell wall and cell processes	NA	NA	0.977	0.00785	0.000772	0.992	0.596
Rv2026c	0.8099	1.1653	1.199	0.8908	1.1014	Rv2026c	Universal stress protein family protein	virulence, detoxification, adaptation	NA	NA	0.0887	0.0128	0.0872	0.00814	0.0126
Rv2038c	-0.5183	-0.6268	-0.936	-1.3752	-1.148	Rv2038c	Probable sugar-transport ATP-binding protein ABC transporter	cell wall and cell processes	mtu02010	ABC transporters	0.246	0.114	0.0082	0.0214	0.00979
Rv2056c	-1.6636	-1.0724	-0.2392	-2.2154	-1.7461	rpsN2	30S ribosomal protein S14 RpsN2	information pathways	mtu03010	Ribosome	0.000248	0.00117	7.81e-05	0.354	3.99e-05
Rv2058c	-1.5928	-1.1307	-0.2585	-1.688	-1.7252	rpmB2	50S ribosomal protein L28 RpmB2	information pathways	mtu03010	Ribosome	0.00073	0.00254	0.00274	0.394	0.000153
Rv2083	-0.2788	-0.4821	-0.622	-1.0583	-1.1525	Rv2083	Conserved hypothetical protein	conserved hypotheticals	NA	NA	0.36	0.08	0.0144	0.0228	0.000792
Rv2101	-0.6034	-0.0966	-0.0984	-1.0059	-0.7251	helZ	Probable helicase HelZ	information pathways	NA	NA	0.00637	0.66	0.000341	0.614	0.00068
Rv2102	-0.3808	-0.1136	-0.1813	-1.432	-0.8015	Rv2102	Conserved hypothetical protein	conserved hypotheticals	NA	NA	0.0466	0.545	6.87e-05	0.27	0.000215
Rv2107	-0.1588	-0.6364	-1.001	0.0442	-0.0799	PE22	PE family protein PE22	PE/PPE	NA	NA	0.747	0.11	0.945	0.016	0.848
Rv2115c	1.1268	1.0089	0.9822	1.5642	1.6753	mpa	Mycobacterial proteasome ATPase Mpa	cell wall and cell processes	mtu03050	Proteasome	0.000108	0.000217	1.66e-06	0.000114	3.87e-07
Rv2124c	0.6466	1.1517	1.3654	1.11	1.283	metH	5-methyltetrahydrofolate--homocystein methyltransferase MetH (methionine synthase, vitamin-B12 dependent isozyme) (ms)	intermediary metabolism and respiration	mtu00270	Cysteine and methionine metabolism	0.0081	0.000139	6.92e-05	1.83e-05	1.03e-05
Rv2137c	0.5231	0.3136	0.4294	1.1193	1.2009	Rv2137c	Conserved hypothetical protein	conserved hypotheticals	NA	NA	0.0214	0.143	5.62e-05	0.0348	1.22e-05
Rv2169c	0.8996	0.6871	0.4898	1.3627	1.2556	Rv2169c	Probable conserved transmembrane protein	cell wall and cell processes	NA	NA	0.000347	0.00183	7.38e-06	0.0102	3.24e-06
Rv2230c	-0.094	-0.5005	-0.4192	-2.1809	-0.7326	Rv2230c	Conserved protein	conserved hypotheticals	NA	NA	0.88	0.277	0.0028	0.333	0.111
Rv2236c	-0.6189	-0.9523	-0.8998	-0.6618	-1.3166	cobD	Probable cobalamin biosynthesis transmembrane protein CobD	intermediary metabolism and respiration	mtu00860	Porphyrin metabolism	0.0474	0.00277	0.0586	0.00304	0.000289
Rv2240c	-0.5991	-0.5093	-0.5028	-1.2475	-0.9352	Rv2240c	Unknown protein	conserved hypotheticals	NA	NA	0.036	0.053	0.00373	0.042	0.00145
Rv2244	-0.9903	-0.9492	-1.0294	-1.0895	-1.2469	acpM	Meromycolate extension acyl carrier protein AcpM	lipid metabolism	mtu01100	Metabolic pathways	0.000409	0.000518	0.000114	0.000138	1.22e-05
Rv2245	-0.7188	-0.8716	-0.8723	-1.4451	-1.5022	kasA	3-oxoacyl-[acyl-carrier protein] synthase 1 KasA (beta-ketoacyl-ACP synthase) (KAS I)	lipid metabolism	NA	NA	0.00707	0.00202	2.51e-05	0.00131	5.73e-06
Rv2246	-0.2711	-0.673	-0.7377	-1.0679	-1.0762	kasB	3-oxoacyl-[acyl-carrier protein] synthase 2 KasB (beta-ketoacyl-ACP synthase) (KAS I)	lipid metabolism	NA	NA	0.264	0.00881	0.000358	0.00307	8.82e-05
Rv2248	0.0186	-0.4572	-0.4353	-1.041	-0.9352	Rv2248	Conserved hypothetical protein	conserved hypotheticals	NA	NA	0.961	0.102	0.0166	0.1	0.0028
Rv2257c	-0.4129	-0.4885	-0.4399	-1.1476	-1.0588	Rv2257c	Conserved protein	conserved hypotheticals	NA	NA	0.0897	0.0339	0.00271	0.0408	0.000238
Rv2268c	-1.01	0.0331	-0.2366	-0.6056	-0.2805	cyp128	Probable cytochrome P450 128 Cyp128	intermediary metabolism and respiration	NA	NA	0.0109	0.929	0.14	0.44	0.373
Rv2270	-1.0734	-0.7478	-1.0326	-1.0475	-1.1604	lppN	Probable lipoprotein LppN	cell wall and cell processes	NA	NA	0.0224	0.0572	0.0398	0.0114	0.00772
Rv2273	-0.8091	-0.2231	0.1931	-1.2689	-1.208	Rv2273	Probable conserved transmembrane protein	cell wall and cell processes	NA	NA	0.087	0.614	0.0159	0.629	0.00926
Rv2274c	-0.7573	0.0301	0.1135	-0.1003	-1.1081	mazF8	Possible toxin MazF8	virulence, detoxification, adaptation	NA	NA	0.134	0.951	0.86	0.804	0.0173
Rv2275	-0.2475	-0.5891	-0.3973	-1.2842	-0.9844	Rv2275	Conserved hypothetical protein	conserved hypotheticals	NA	NA	0.368	0.0257	0.00264	0.097	0.000864
Rv2276	-0.3709	-0.5757	-0.5489	-1.0943	-0.9501	cyp121	Cytochrome P450 121 Cyp121	intermediary metabolism and respiration	NA	NA	0.299	0.0892	0.0152	0.0832	0.0062
Rv2277c	-0.797	-0.6824	-0.7143	-1.2833	-1.4592	Rv2277c	Possible glycerolphosphodiesterase	intermediary metabolism and respiration	NA	NA	0.0342	0.0385	0.00842	0.0256	0.000611
Rv2282c	-0.7927	-0.4716	-0.5635	-1.2958	-1.2351	Rv2282c	Probable transcription regulator (LysR family)	regulatory proteins	NA	NA	0.234	0.434	0.0804	0.311	0.0472
Rv2298	0.4006	0.9589	1.0341	0.5332	0.7753	Rv2298	Conserved protein	conserved hypotheticals	NA	NA	0.0486	0.000172	0.0189	4.32e-05	0.000304
Rv2307c	-0.084	0.0476	0.2431	-1.7931	-0.1396	Rv2307c	Conserved hypothetical protein	conserved hypotheticals	NA	NA	0.905	0.934	0.00838	0.62	0.791
Rv2316	0.251	0.9087	1.1291	1.2384	0.6715	uspA	Probable sugar-transport integral membrane protein ABC transporter UspA	cell wall and cell processes	NA	NA	0.695	0.079	0.0256	0.0255	0.176
Rv2323c	1.0566	0.1794	-0.4061	1.9116	1.2323	Rv2323c	Conserved protein	conserved hypotheticals	NA	NA	0.0137	0.681	0.000299	0.292	0.00229
Rv2324	0.9303	-0.0473	-0.3325	1.0143	0.66	Rv2324	Probable transcriptional regulatory protein (probably AsnC-family)	regulatory proteins	NA	NA	0.023	0.919	0.0283	0.377	0.0648
Rv2350c	-1.0775	-0.6274	-0.7627	-0.8361	-1.0793	plcB	Membrane-associated phospholipase C 2 PlcB	intermediary metabolism and respiration	mtu00562	Inositol phosphate metabolism	0.000347	0.00888	0.00573	0.0017	8.72e-05
Rv2359	0.7136	0.7377	0.7626	1.2825	1.0416	zur	Probable zinc uptake regulation protein Zur	regulatory proteins	NA	NA	0.00459	0.00331	6.78e-05	0.00168	8.49e-05
Rv2387	0.2668	1.1518	1.4144	0.7141	0.9451	Rv2387	Conserved protein	conserved hypotheticals	NA	NA	0.331	0.000401	0.0152	3.6e-05	0.000619
Rv2391	-0.8167	-0.9196	-0.8906	-1.2695	-1.4336	sirA	Ferredoxin-dependent sulfite reductase SirA	intermediary metabolism and respiration	mtu00920	Sulfur metabolism	0.00283	0.00123	4.3e-05	0.000964	6.99e-06
Rv2392	-0.4025	-0.6902	-0.5059	-1.2111	-1.0173	cysH	Probable 3'-phosphoadenosine 5'-phosphosulfate reductase CysH (PAPS reductase, thioredoxin DEP.) (padops reductase) (3'- phosphoadenylylsulfate reductase) (PAPS sulfotransferase)	intermediary metabolism and respiration	mtu00920	Sulfur metabolism	0.134	0.0138	0.0012	0.0417	0.000495
Rv2393	-0.1909	-0.7044	-0.5824	-1.0584	-1.1947	che1	Ferrochelatase Che1	intermediary metabolism and respiration	NA	NA	0.463	0.00758	0.00305	0.0144	8.54e-05
Rv2395B	0.4697	0.718	0.9581	0.9705	1.125	aprB	Acid and phagosome regulated protein B AprB	conserved hypotheticals	NA	NA	0.0304	0.00253	0.000225	0.000141	1.69e-05
Rv2398c	-0.4998	-0.1356	-0.0984	-1.068	-0.9283	cysW	Probable sulfate-transport integral membrane protein ABC transporter CysW	cell wall and cell processes	mtu00920	Sulfur metabolism	0.132	0.686	0.0252	0.757	0.00595
Rv2417c	0.039	-0.5148	-0.4336	-0.4734	-1.1404	Rv2417c	Conserved protein	conserved hypotheticals	NA	NA	0.932	0.138	0.305	0.189	0.00489
Rv2430c	-0.7957	-1.4026	-1.2122	-1.5714	-1.5335	PPE41	PPE family protein PPE41	PE/PPE	NA	NA	0.00571	8.04e-05	0.000119	0.000129	1.16e-05
Rv2431c	-0.8165	-1.4793	-1.3718	-1.4441	-1.568	PE25	PE family protein PE25	PE/PPE	NA	NA	0.00335	3.44e-05	0.000136	3.02e-05	6.18e-06
Rv2432c	-0.8629	-1.5223	-1.4733	-1.2991	-1.5675	Rv2432c	Hypothetical protein	conserved hypotheticals	NA	NA	0.00335	3.56e-05	0.00119	2.68e-05	1.22e-05
Rv2434c	-0.478	-0.8473	-0.8027	-1.0841	-0.9275	Rv2434c	Probable conserved transmembrane protein	cell wall and cell processes	NA	NA	0.202	0.0198	0.0319	0.0195	0.0123
Rv2436	-0.2888	-0.7104	-0.9704	-1.2598	-0.6032	rbsK	Ribokinase RbsK	intermediary metabolism and respiration	mtu00030	Pentose phosphate pathway	0.454	0.0409	0.01	0.00732	0.0749
Rv2446c	0.0783	0.2073	0.1373	-1.9557	-0.242	Rv2446c	Probable conserved integral membrane protein	cell wall and cell processes	NA	NA	0.905	0.68	0.00172	0.775	0.615
Rv2460c	1.0517	0.7407	0.3484	1.0527	0.9324	clpP2	Probable ATP-dependent CLP protease proteolytic subunit 2 ClpP2 (endopeptidase CLP 2)	intermediary metabolism and respiration	NA	NA	0.00204	0.0171	0.00142	0.193	0.00161
Rv2461c	1.1523	0.9194	0.6349	1.2221	1.1735	clpP1	Probable ATP-dependent CLP protease proteolytic subunit 1 ClpP1 (endopeptidase CLP)	intermediary metabolism and respiration	NA	NA	0.00137	0.00638	0.000513	0.0275	0.00034
Rv2466c	-1.0954	-0.3463	-0.4443	-1.1547	-1.7764	Rv2466c	Conserved protein	conserved hypotheticals	NA	NA	0.219	0.718	0.225	0.597	0.0341
Rv2491	-0.1415	0.0196	-0.122	1.0853	-0.4498	Rv2491	Conserved hypothetical protein	conserved hypotheticals	NA	NA	0.816	0.968	0.0329	0.804	0.329
Rv2497c	1.1501	-0.4346	-0.9426	0.8666	0.5796	bkdA	Probable branched-chain keto acid dehydrogenase E1 component, alpha subunit BkdA	intermediary metabolism and respiration	mtu00280	Valine, leucine and isoleucine degradation	0.000351	0.0826	0.00263	0.000897	0.0131
Rv2498c	1.078	-0.2886	-0.8788	0.8475	0.4093	citE	Probable citrate (pro-3S)-lyase (beta subunit) CitE (citrase) (citratase) (citritase) (citridesmolase) (citrase aldolase)	intermediary metabolism and respiration	mtu02020	Two-component system	0.00191	0.349	0.0166	0.0062	0.134
Rv2500c	0.7632	-0.6487	-1.096	0.7175	0.1678	fadE19	Possible acyl-CoA dehydrogenase FadE19 (MMGC)	lipid metabolism	mtu00280	Valine, leucine and isoleucine degradation	0.00296	0.0087	0.00576	0.000114	0.417
Rv2501c	0.8843	-0.7452	-1.1367	0.7436	0.159	accA1	Probable acetyl-/propionyl-coenzyme A carboxylase alpha chain (alpha subunit) AccA1: biotin carboxylase + biotin carboxyl carrier protein (BCCP)	lipid metabolism	mtu00280	Valine, leucine and isoleucine degradation	0.00899	0.0232	0.0361	0.0015	0.594
Rv2557	1.0284	0.3968	0.256	1.7359	1.4069	Rv2557	Conserved protein	conserved hypotheticals	NA	NA	0.000625	0.101	5.14e-06	0.255	9.75e-06
Rv2558	0.9412	0.2581	0.1236	1.3884	1.2348	Rv2558	Conserved protein	conserved hypotheticals	NA	NA	0.00246	0.353	8.04e-05	0.643	8.49e-05
Rv2590	0.6658	1.0634	1.5594	1.2577	1.5615	fadD9	Probable fatty-acid-CoA ligase FadD9 (fatty-acid-CoA synthetase) (fatty-acid-CoA synthase)	lipid metabolism	NA	NA	0.0208	0.00112	0.000116	2.68e-05	1.02e-05
Rv2593c	-0.7435	-0.6404	-0.8931	-0.933	-1.3265	ruvA	Probable holliday junction DNA helicase RuvA	information pathways	mtu03440	Homologous recombination	0.13	0.139	0.0838	0.0385	0.00771
Rv2594c	-0.7082	-0.5725	-0.5458	-1.3864	-0.9839	ruvC	Probable crossover junction endodeoxyribonuclease RuvC (holliday junction nuclease) (holliday junction resolvase)	information pathways	mtu03440	Homologous recombination	0.0307	0.0528	0.004	0.0489	0.00248
Rv2599	-0.9221	-0.9257	-0.8412	-1.0748	-1.5366	Rv2599	Probable conserved membrane protein	cell wall and cell processes	NA	NA	0.0463	0.0259	0.0399	0.0314	0.00189
Rv2600	-0.3138	-1.0605	-1.228	-1.0882	-1.466	Rv2600	Probable conserved integral membrane protein	cell wall and cell processes	NA	NA	0.338	0.00227	0.0152	0.000661	0.00026
Rv2601	0.1074	-0.4095	-0.6094	-0.7472	-1.0932	speE	Probable spermidine synthase SpeE (putrescine aminopropyltransferase) (aminopropyltransferase) (SPDSY)	intermediary metabolism and respiration	mtu00270	Cysteine and methionine metabolism	0.804	0.235	0.0931	0.0692	0.0062
Rv2604c	-0.1778	-0.5616	-0.6867	-1.0459	-0.8301	snoP	Probable glutamine amidotransferase SnoP	intermediary metabolism and respiration	mtu00750	Vitamin B6 metabolism	0.531	0.0294	0.00621	0.0083	0.00337
Rv2620c	-0.3071	-0.5316	-0.6227	-1.0961	-0.688	Rv2620c	Probable conserved transmembrane protein	cell wall and cell processes	NA	NA	0.41	0.13	0.0185	0.0602	0.0372
Rv2621c	-0.2505	-0.5506	-0.7292	-0.4884	-1.035	Rv2621c	Possible transcriptional regulatory protein	regulatory proteins	NA	NA	0.485	0.101	0.177	0.0252	0.00278
Rv2632c	0.5443	1.2691	1.2912	1.39	1.6273	Rv2632c	Conserved protein	conserved hypotheticals	NA	NA	0.0385	0.000157	4.93e-05	5.91e-05	3.74e-06
Rv2633c	0.8016	1.6603	1.7032	1.7909	1.9681	Rv2633c	Hypothetical protein	conserved hypotheticals	NA	NA	0.00937	4.74e-05	1.06e-05	2.07e-05	2.26e-06
Rv2638	0.7639	0.7285	0.5079	1.1221	1.0512	Rv2638	Conserved hypothetical protein	conserved hypotheticals	NA	NA	0.00619	0.00726	0.000777	0.0329	0.0002
Rv2641	1.7528	1.2543	0.0962	3.4617	2.2342	cadI	Cadmium inducible protein CadI	conserved hypotheticals	NA	NA	0.00288	0.0175	1.22e-05	0.851	0.000177
Rv2642	1.2441	0.9553	-0.0643	2.4792	1.3007	Rv2642	Possible transcriptional regulatory protein (probably ArsR-family)	regulatory proteins	NA	NA	0.00211	0.00915	6.31e-06	0.866	0.000577
Rv2643	0.7292	0.1278	0.0733	1.3229	0.5931	arsC	Probable arsenic-transport integral membrane protein ArsC	cell wall and cell processes	NA	NA	0.0918	0.785	0.00769	0.867	0.119
Rv2650c	0.8622	-1.2318	-1.445	0.4604	-0.1819	Rv2650c	Possible PhiRv2 prophage protein	insertion seqs and phages	NA	NA	0.0614	0.0149	0.404	0.00557	0.694
Rv2651c	0.662	-1.7874	-1.8577	0.0762	-0.0281	Rv2651c	Possible PhiRv2 prophage protease	insertion seqs and phages	NA	NA	0.144	0.00183	0.902	0.00105	0.953
Rv2662	-1.0279	-1.0981	-0.7887	-1.058	-1.2093	Rv2662	Hypothetical protein	conserved hypotheticals	NA	NA	0.118	0.0705	0.234	0.154	0.0484
Rv2680	-0.9076	-0.6016	-0.6265	-1.0349	-0.9715	Rv2680	Conserved protein	conserved hypotheticals	NA	NA	0.000347	0.0033	0.000695	0.00168	4.74e-05
Rv2710	1.4357	0.645	0.2507	1.2966	0.9602	sigB	RNA polymerase sigma factor SigB	information pathways	NA	NA	0.00223	0.101	0.00228	0.498	0.00969
Rv2711	0.9736	0.8442	0.7794	1.1858	1.0253	ideR	Iron-dependent repressor and activator IdeR	regulatory proteins	NA	NA	0.000499	0.00135	3.91e-05	0.00145	7.71e-05
Rv2729c	0.7197	0.3607	0.1384	1.0565	0.9873	Rv2729c	Probable conserved integral membrane alanine valine and leucine rich protein	cell wall and cell processes	NA	NA	0.0258	0.231	0.0044	0.65	0.00162
Rv2739c	-0.7977	-0.8348	-0.5524	-1.6143	-1.2407	Rv2739c	Possible alanine rich transferase	intermediary metabolism and respiration	NA	NA	0.024	0.00966	0.000817	0.0526	0.000899
Rv2743c	1.2474	0.6142	0.6011	0.4122	0.5603	Rv2743c	Possible conserved transmembrane alanine rich protein	cell wall and cell processes	NA	NA	0.000494	0.034	0.211	0.0273	0.034
Rv2744c	1.2362	0.7693	0.6159	0.9793	0.7473	35kd_ag	Conserved 35 kDa alanine rich protein	conserved hypotheticals	NA	NA	0.00288	0.0372	0.00838	0.0635	0.0214
Rv2745c	1.3233	0.7342	0.3641	1.0122	0.6816	clgR	Transcriptional regulatory protein ClgR	regulatory proteins	NA	NA	0.0234	0.169	0.0619	0.466	0.144
Rv2761c	-0.2244	-0.7195	-0.818	-1.353	-1.3526	hsdS	Possible type I restriction/modification system specificity determinant HsdS (S protein)	information pathways	NA	NA	0.674	0.11	0.0437	0.0618	0.00951
Rv2763c	-0.6524	-0.7089	-0.6831	-0.702	-1.0274	dfrA	Dihydrofolate reductase DfrA (DHFR) (tetrahydrofolate dehydrogenase)	intermediary metabolism and respiration	mtu00670	One carbon pool by folate	0.0425	0.018	0.0792	0.0162	0.002
Rv2766c	0.2477	0.9919	1.206	0.6251	0.6107	Rv2766c	Probable short-chain type dehydrogenase/reductase	intermediary metabolism and respiration	NA	NA	0.339	0.000469	0.0358	5.47e-05	0.00884
Rv2771c	-0.4089	-0.6953	-1.2259	-0.7231	-0.7073	Rv2771c	Conserved hypothetical protein	conserved hypotheticals	NA	NA	0.211	0.0261	0.0839	0.000782	0.0229
Rv2779c	-0.8555	-0.9498	-1.0603	-0.9618	-1.3897	Rv2779c	Possible transcriptional regulatory protein (probably Lrp/AsnC-family)	regulatory proteins	NA	NA	0.00244	0.000626	0.00599	0.000168	2.6e-05
Rv2780	-0.7702	-2.1597	-2.1191	-1.3452	-2.0477	ald	Secreted L-alanine dehydrogenase Ald (40 kDa antigen) (TB43)	intermediary metabolism and respiration	mtu00250	Alanine, aspartate and glutamate metabolism	0.273	0.00772	0.0465	0.0052	0.00403
Rv2781c	-1.1693	-2.1845	-2.1138	-2.0341	-2.579	Rv2781c	Possible alanine rich oxidoreductase	intermediary metabolism and respiration	mtu00910	Nitrogen metabolism	0.0851	0.00572	0.0105	0.00424	0.000883
Rv2782c	-0.3449	-0.8658	-0.673	-1.1739	-1.0764	pepR	Probable zinc protease PepR	intermediary metabolism and respiration	NA	NA	0.152	0.0015	0.00135	0.0052	0.000151
Rv2787	-0.8558	-0.4481	-0.5196	-1.101	-0.8633	Rv2787	Conserved hypothetical alanine rich protein	conserved hypotheticals	NA	NA	0.000667	0.0261	0.000457	0.00856	0.00019
Rv2801A	0.1797	0.5206	0.0678	1.3545	0.3914	mazE9	Possible antitoxin MazE9	virulence, detoxification, adaptation	NA	NA	0.71	0.176	0.00488	0.871	0.301
Rv2808	-0.4192	-0.524	-0.4307	-1.4946	-0.3912	Rv2808	Hypothetical protein	conserved hypotheticals	NA	NA	0.319	0.16	0.0107	0.223	0.289
Rv2816c	-1.1789	-1.1014	-0.9668	-1.3914	-1.4204	Rv2816c	Conserved hypothetical protein	conserved hypotheticals	NA	NA	0.0139	0.0133	0.0237	0.0179	0.00229
Rv2817c	-0.796	-0.8607	-0.7925	-1.3215	-1.425	Rv2817c	Conserved hypothetical protein	conserved hypotheticals	NA	NA	0.0194	0.0101	0.00426	0.0109	0.000174
Rv2818c	0.953	1.2423	1.0562	1.5126	1.6133	Rv2818c	Hypothetical protein	unknown	NA	NA	0.000952	8.6e-05	2.69e-05	0.000168	2.43e-06
Rv2819c	0.6927	1.0305	0.8777	1.4092	1.2466	Rv2819c	Hypothetical protein	conserved hypotheticals	NA	NA	0.0134	0.000692	9.52e-05	0.00152	5.2e-05
Rv2820c	1.0001	1.665	1.8716	1.9251	2.1287	Rv2820c	Hypothetical protein	conserved hypotheticals	NA	NA	0.00211	2.66e-05	1.06e-05	4.95e-06	5.87e-07
Rv2821c	1.1581	1.701	1.8285	2.1653	2.2741	Rv2821c	Conserved hypothetical protein	conserved hypotheticals	NA	NA	0.000347	9.78e-06	1.11e-06	3.3e-06	1.21e-07
Rv2822c	1.4446	1.7477	1.9338	2.27	2.4702	Rv2822c	Hypothetical protein	conserved hypotheticals	NA	NA	0.000347	4.21e-05	6.24e-06	1.11e-05	3.91e-07
Rv2823c	1.1139	1.5008	1.8117	1.8523	2.0886	Rv2823c	Conserved protein	conserved hypotheticals	NA	NA	0.000347	2.66e-05	3.16e-06	3.3e-06	1.97e-07
Rv2824c	0.9585	1.2892	1.7961	1.6947	2.0903	Rv2824c	Hypothetical protein	conserved hypotheticals	NA	NA	0.00294	0.00026	4.22e-05	8.63e-06	8.56e-07
Rv2826c	0.7223	-0.6369	-1.0016	-0.0989	-0.1802	Rv2826c	Hypothetical protein	conserved hypotheticals	NA	NA	0.128	0.178	0.892	0.035	0.711
Rv2830c	-0.5544	-0.9659	-1.0632	-0.8631	-0.7034	vapB22	Possible antitoxin VapB22	virulence, detoxification, adaptation	NA	NA	0.2	0.0204	0.102	0.00992	0.0743
Rv2832c	-0.8832	-0.6143	-0.4844	-0.6869	-1.0524	ugpC	Probable Sn-glycerol-3-phosphate transport ATP-binding protein ABC transporter UgpC	cell wall and cell processes	mtu02010	ABC transporters	0.0872	0.166	0.252	0.249	0.0289
Rv2833c	-0.2004	-0.4109	-0.8507	-1.4173	-0.9213	ugpB	Probable Sn-glycerol-3-phosphate-binding lipoprotein UgpB	cell wall and cell processes	mtu02010	ABC transporters	0.75	0.435	0.022	0.0865	0.0775
Rv2838c	1.0838	0.7271	0.8056	0.5868	0.737	rbfA	Probable ribosome-binding factor a RbfA (P15B protein)	information pathways	NA	NA	0.000528	0.00769	0.0374	0.00245	0.00305
Rv2846c	-1.1329	-1.2816	-1.137	-1.0762	-1.254	efpA	Possible integral membrane efflux protein EfpA	cell wall and cell processes	NA	NA	0.00134	0.000498	0.00134	0.000776	0.000167
Rv2850c	0.343	-0.9005	-1.1422	-0.5102	-0.3709	Rv2850c	Possible magnesium chelatase	intermediary metabolism and respiration	mtu00860	Porphyrin metabolism	0.258	0.0061	0.181	0.000881	0.177
Rv2859c	-0.1367	-0.0959	0.0171	-1.1287	-0.3972	Rv2859c	Possible amidotransferase	intermediary metabolism and respiration	NA	NA	0.706	0.774	0.0128	0.959	0.179
Rv2865	0.5157	0.4862	-0.1455	1.4143	0.7413	relF	Antitoxin RelF	virulence, detoxification, adaptation	NA	NA	0.178	0.177	0.00219	0.701	0.0319
Rv2866	0.505	0.4736	0.251	1.5654	0.4962	relG	Toxin RelG	virulence, detoxification, adaptation	NA	NA	0.168	0.165	0.000695	0.456	0.131
Rv2873	2.0175	2.5225	2.7158	2.7426	2.5838	mpt83	Cell surface lipoprotein Mpt83 (lipoprotein P23)	cell wall and cell processes	NA	NA	0.016	0.00459	0.00263	0.00187	0.00161
Rv2874	1.1634	1.7208	2.2167	1.5584	1.5434	dipZ	Possible integral membrane C-type cytochrome biogenesis protein DipZ	intermediary metabolism and respiration	NA	NA	0.168	0.0408	0.0792	0.0093	0.043
Rv2875	2.824	3.4988	3.7841	3.071	3.3326	mpt70	Major secreted immunogenic protein Mpt70	cell wall and cell processes	NA	NA	0.0128	0.00347	0.00744	0.00145	0.00208
Rv2876	0.6152	1.0919	1.418	0.8091	0.9308	Rv2876	Possible conserved transmembrane protein	cell wall and cell processes	NA	NA	0.258	0.0429	0.152	0.00891	0.0521
Rv2877c	0.799	1.6567	2.1722	0.9773	1.3051	Rv2877c	Probable conserved integral membrane protein	cell wall and cell processes	NA	NA	0.32	0.0367	0.237	0.00736	0.0611
Rv2887	0.0847	-0.4509	-0.5134	-1.9186	-0.3268	Rv2887	Probable transcriptional regulatory protein	regulatory proteins	NA	NA	0.893	0.341	0.00673	0.247	0.485
Rv2924c	-0.1514	-0.4371	-0.5589	-1.7988	-0.5952	fpg	Probable formamidopyrimidine-DNA glycosylase Fpg (FAPY-DNA glycosylase)	information pathways	mtu03410	Base excision repair	0.797	0.364	0.0128	0.209	0.206
Rv2933	0.4488	-0.7639	-1.0156	-0.5666	-0.7236	ppsC	Phenolpthiocerol synthesis type-I polyketide synthase PpsC	lipid metabolism	NA	NA	0.0507	0.0027	0.0129	0.000153	0.00137
Rv2945c	-0.5846	-0.2896	-0.5184	-0.9113	-1.0015	lppX	Probable conserved lipoprotein LppX	cell wall and cell processes	NA	NA	0.0102	0.158	0.00141	0.0117	7.58e-05
Rv2946c	-0.5328	-0.5834	-0.7698	-1.1247	-1.2813	pks1	Probable polyketide synthase Pks1	lipid metabolism	NA	NA	0.0551	0.0342	0.00184	0.00528	8.49e-05
Rv2947c	-0.4602	-0.1375	-0.4283	-0.9243	-1.137	pks15	Probable polyketide synthase Pks15	lipid metabolism	NA	NA	0.05	0.572	0.00283	0.0419	6.09e-05
Rv2966c	-0.0218	-0.7165	-0.8495	-0.8259	-1.5919	Rv2966c	Possible methyltransferase (methylase)	intermediary metabolism and respiration	NA	NA	0.964	0.0545	0.0723	0.0221	0.000788
Rv2971	0.231	0.9049	1.1207	0.8569	1.0801	Rv2971	Probable oxidoreductase	intermediary metabolism and respiration	NA	NA	0.341	0.00115	0.00104	0.000107	7.53e-05
Rv2972c	0.7828	1.2258	1.34	0.8736	1.1168	Rv2972c	Possible conserved membrane or exported protein	cell wall and cell processes	NA	NA	0.00862	0.000286	0.00857	6.81e-05	0.000226
Rv2973c	-0.2281	-0.576	-0.5035	-1.0083	-0.9168	recG	Probable ATP-dependent DNA helicase RecG	information pathways	mtu03440	Homologous recombination	0.483	0.0477	0.0141	0.0645	0.00471
Rv2974c	-0.3976	-0.5173	-0.3579	-1.242	-0.8624	Rv2974c	Conserved hypothetical alanine rich protein	conserved hypotheticals	NA	NA	0.405	0.218	0.0198	0.375	0.0479
Rv2980	-0.2969	-0.4722	-0.3181	-1.227	-1.2444	Rv2980	Possible conserved secreted protein	cell wall and cell processes	NA	NA	0.52	0.235	0.0277	0.404	0.0077
Rv3000	0.9836	2.1489	2.6237	1.8248	2.1844	Rv3000	Possible conserved transmembrane protein	cell wall and cell processes	NA	NA	0.0551	0.000498	0.00261	6.49e-05	0.000163
Rv3001c	1.0425	1.7924	2.101	1.7471	2.0228	ilvC	Probable KETOL-acid reductoisomerase IlvC (acetohydroxy-acid isomeroreductase) (alpha-keto-beta-hydroxylacil reductoisomerase)	intermediary metabolism and respiration	mtu00290	Valine, leucine and isoleucine biosynthesis	0.0129	0.000419	0.000294	6.49e-05	4.14e-05
Rv3002c	1.1161	1.9849	2.3335	1.9821	2.3735	ilvN	Probable acetolactate synthase (small subunit) IlvN (acetohydroxy-acid synthase) (AHAS) (ALS)	intermediary metabolism and respiration	mtu00290	Valine, leucine and isoleucine biosynthesis	0.0106	0.000266	0.000162	3.6e-05	1.31e-05
Rv3003c	0.8204	1.6435	2.0263	1.4469	1.9009	ilvB1	Acetolactate synthase (large subunit) IlvB1 (acetohydroxy-acid synthase)	intermediary metabolism and respiration	mtu00290	Valine, leucine and isoleucine biosynthesis	0.0159	0.000166	0.000199	1.69e-05	9.67e-06
Rv3012c	-0.9176	-0.3696	-0.181	-1.0099	-1.1279	gatC	Probable glutamyl-tRNA(GLN) amidotransferase (subunit C) GatC (Glu-ADT subunit C)	information pathways	mtu00970	Aminoacyl-tRNA biosynthesis	0.0156	0.231	0.0178	0.552	0.00249
Rv3016	0.5147	0.744	0.1521	1.459	0.9784	lpqA	Probable lipoprotein LpqA	cell wall and cell processes	NA	NA	0.0521	0.00715	4.74e-05	0.537	0.000402
Rv3019c	-0.4786	0.1995	0.2648	1.246	-0.1623	esxR	Secreted ESAT-6 like protein EsxR (TB10.3) (ESAT-6 like protein 9)	cell wall and cell processes	mtu05152	Tuberculosis	0.437	0.732	0.0277	0.61	0.768
Rv3039c	-0.3818	-0.9466	-0.7618	-0.6934	-1.2355	echA17	Probable enoyl-CoA hydratase EchA17 (crotonase) (unsatured acyl-CoA hydratase) (enoyl hydrase)	lipid metabolism	mtu00071	Fatty acid degradation	0.327	0.0128	0.164	0.0276	0.00298
Rv3040c	-0.3773	-0.4689	-0.7283	-0.8198	-1.0827	Rv3040c	Conserved protein	conserved hypotheticals	NA	NA	0.353	0.19	0.0947	0.0393	0.00803
Rv3059	0.7063	0.7121	0.6042	1.476	1.3051	cyp136	Probable cytochrome P450 136 Cyp136	intermediary metabolism and respiration	NA	NA	0.0013	0.00115	1.66e-06	0.0022	1.52e-06
Rv3065	0.6475	-0.1157	-0.3463	1.2259	0.6402	mmr	Multidrugs-transport integral membrane protein Mmr	cell wall and cell processes	NA	NA	0.114	0.797	0.00952	0.375	0.0825
Rv3079c	0.5662	0.1485	-0.1409	1.081	0.8072	Rv3079c	Conserved protein	conserved hypotheticals	NA	NA	0.0446	0.611	0.00177	0.597	0.00282
Rv3087	1.2189	0.5104	-0.2434	1.8593	1.4944	Rv3087	Possible triacylglycerol synthase (diacylglycerol acyltransferase)	lipid metabolism	mtu00561	Glycerolipid metabolism	0.00938	0.221	0.000774	0.564	0.000978
Rv3088	0.6728	0.1096	-0.3874	1.3402	0.8928	tgs4	Putative triacylglycerol synthase (diacylglycerol acyltransferase) Tgs4	lipid metabolism	mtu00561	Glycerolipid metabolism	0.067	0.781	0.00246	0.247	0.00897
Rv3089	0.4671	-0.1309	-0.4117	1.0691	0.5032	fadD13	Probable chain -fatty-acid-CoA ligase FadD13 (fatty-acyl-CoA synthetase)	lipid metabolism	NA	NA	0.134	0.696	0.00378	0.149	0.0682
Rv3109	-1.1766	-0.6676	-1.1647	-1.5188	-1.5506	moaA1	Probable molybdenum cofactor biosynthesis protein A MoaA1	intermediary metabolism and respiration	mtu00790	Folate biosynthesis	0.0924	0.267	0.0344	0.0515	0.0178
Rv3122	0.1391	-0.8931	-1.1166	-0.2653	-0.9022	Rv3122	Hypothetical protein	conserved hypotheticals	NA	NA	0.638	0.00289	0.442	0.000469	0.00254
Rv3139	-1.0078	-1.5943	-1.1573	-0.6179	-1.2751	fadE24	Probable acyl-CoA dehydrogenase FadE24	lipid metabolism	NA	NA	0.0496	0.00572	0.183	0.0182	0.00791
Rv3140	-0.4823	-1.1258	-0.6267	-0.5513	-0.8609	fadE23	Probable acyl-CoA dehydrogenase FadE23	lipid metabolism	mtu00071	Fatty acid degradation	0.181	0.00572	0.108	0.0615	0.0106
Rv3151	-0.2618	-0.7211	-0.7631	-1.0297	-0.9354	nuoG	Probable NADH dehydrogenase I (chain G) NuoG (NADH-ubiquinone oxidoreductase chain G)	intermediary metabolism and respiration	mtu00190	Oxidative phosphorylation	0.555	0.0802	0.0362	0.0492	0.0173
Rv3154	-0.3108	-0.9198	-1.051	-1.5699	-1.2313	nuoJ	Probable NADH dehydrogenase I (chain J) NuoJ (NADH-ubiquinone oxidoreductase chain J)	intermediary metabolism and respiration	mtu00190	Oxidative phosphorylation	0.472	0.0274	0.013	0.0108	0.00453
Rv3155	-0.455	-0.7188	-0.9821	-1.193	-1.1216	nuoK	Probable NADH dehydrogenase I (chain K) NuoK (NADH-ubiquinone oxidoreductase chain K)	intermediary metabolism and respiration	mtu00190	Oxidative phosphorylation	0.148	0.0206	0.0115	0.00262	0.00124
Rv3156	-0.1702	-0.8311	-0.9642	-1.0994	-1.3409	nuoL	Probable NADH dehydrogenase I (chain L) NuoL (NADH-ubiquinone oxidoreductase chain L)	intermediary metabolism and respiration	mtu00190	Oxidative phosphorylation	0.732	0.057	0.0589	0.0226	0.00406
Rv3157	-0.1937	-0.7346	-1.0742	-1.2497	-1.1308	nuoM	Probable NADH dehydrogenase I (chain M) NUOK (NADH-ubiquinone oxidoreductase chain M)	intermediary metabolism and respiration	mtu00190	Oxidative phosphorylation	0.668	0.0724	0.0215	0.00998	0.0065
Rv3158	-0.2243	-0.592	-0.7776	-1.0772	-0.9906	nuoN	Probable NADH dehydrogenase I (chain N) NuoN (NADH-ubiquinone oxidoreductase chain N)	intermediary metabolism and respiration	mtu00190	Oxidative phosphorylation	0.495	0.0553	0.00854	0.011	0.00207
Rv3180c	0.6467	0.6763	0.5087	1.27	1.1371	Rv3180c	Hypothetical alanine rich protein	conserved hypotheticals	NA	NA	0.0278	0.0165	0.000651	0.0474	0.000231
Rv3181c	1.1594	0.7998	0.3861	1.7206	1.6792	Rv3181c	Conserved protein	conserved hypotheticals	NA	NA	0.00156	0.013	8.81e-05	0.185	1.85e-05
Rv3182	0.4028	-0.7087	-1.3338	0.6798	-0.0324	Rv3182	Conserved hypothetical protein	conserved hypotheticals	NA	NA	0.272	0.0502	0.102	0.00145	0.932
Rv3188	0.8548	0.9857	0.4682	2.2638	1.4094	Rv3188	Conserved hypothetical protein	conserved hypotheticals	NA	NA	0.00333	0.00107	1.04e-06	0.0514	1.53e-05
Rv3189	0.2084	0.5032	0.3044	1.1435	0.717	Rv3189	Conserved hypothetical protein	conserved hypotheticals	NA	NA	0.403	0.0333	0.000234	0.155	0.0023
Rv3197	0.8669	0.8469	1.0562	1.4041	1.4406	Rv3197	Probable conserved ATP-binding protein ABC transporter	cell wall and cell processes	NA	NA	0.000351	0.000401	1.88e-06	3.02e-05	6.93e-07
Rv3218	0.0987	0.8101	1.0577	0.3339	0.6185	Rv3218	Conserved protein	conserved hypotheticals	NA	NA	0.801	0.0133	0.394	0.00168	0.0349
Rv3229c	-2.1152	-0.5342	-0.5652	-1.6769	-2.2782	desA3	Possible linoleoyl-CoA desaturase (delta(6)-desaturase)	lipid metabolism	mtu01040	Biosynthesis of unsaturated fatty acids	0.0278	0.565	0.0941	0.488	0.00989
Rv3230c	-1.8439	-0.7019	-1.1466	-1.2728	-2.0987	Rv3230c	Hypothetical oxidoreductase	intermediary metabolism and respiration	mtu01040	Biosynthesis of unsaturated fatty acids	0.00416	0.167	0.0582	0.0236	0.000899
Rv3241c	0.6298	0.788	0.7261	1.0834	1.2666	Rv3241c	Conserved protein	information pathways	NA	NA	0.00292	0.000575	2.69e-05	0.000647	2.43e-06
Rv3249c	0.1676	0.508	1.0345	0.3193	0.0152	Rv3249c	Possible transcriptional regulatory protein (probably TetR-family)	regulatory proteins	NA	NA	0.778	0.337	0.562	0.0393	0.977
Rv3270	-1.4482	-1.1141	-0.884	-1.5628	-2.2204	ctpC	Probable metal cation-transporting P-type ATPase C CtpC	cell wall and cell processes	NA	NA	0.159	0.272	0.151	0.343	0.0232
Rv3271c	-0.7838	-0.4101	-0.3363	-1.1204	-1.2264	Rv3271c	Probable conserved integral membrane protein	cell wall and cell processes	NA	NA	0.166	0.456	0.124	0.501	0.0243
Rv3288c	0.5419	-0.1132	-0.0559	1.1384	0.8692	usfY	Putative protein UsfY	conserved hypotheticals	NA	NA	0.0988	0.755	0.00207	0.867	0.00571
Rv3290c	0.6363	0.0661	0.2037	1.0243	0.9255	lat	Probable L-lysine-epsilon aminotransferase Lat (L-lysine aminotransferase) (lysine 6-aminotransferase)	intermediary metabolism and respiration	NA	NA	0.101	0.884	0.0082	0.584	0.0104
Rv3304	-0.6411	-0.4547	-0.3365	-0.9934	-1.1134	Rv3304	Conserved protein	conserved hypotheticals	NA	NA	0.0135	0.0444	0.0051	0.107	0.000154
Rv3307	-0.5814	-0.5573	-0.5127	-1.0486	-1.011	deoD	Probable purine nucleoside phosphorylase DeoD (inosine phosphorylase) (PNP)	intermediary metabolism and respiration	mtu00230	Purine metabolism	0.0247	0.0183	0.00291	0.0209	0.000413
Rv3308	-0.4187	-0.571	-0.5826	-1.3499	-1.2176	pmmB	Probable phosphomannomutase PmmB (phosphomannose mutase)	intermediary metabolism and respiration	mtu00051	Fructose and mannose metabolism	0.203	0.0603	0.00533	0.0449	0.00115
Rv3312A	0.2701	1.0349	1.298	0.9112	1.1558	Rv3312A	Secreted protein antigen	cell wall and cell processes	NA	NA	0.26	0.000401	0.00106	3.02e-05	3.99e-05
Rv3330	-0.9181	-0.5322	-0.5862	-1.0508	-0.9615	dacB1	Probable penicillin-binding protein DacB1 (D-alanyl-D-alanine carboxypeptidase) (DD-peptidase) (DD-carboxypeptidase) (PBP) (DD-transpeptidase) (serine-type D-ala-D-ala carboxypeptidase) (D-amino acid hydrolase)	cell wall and cell processes	mtu00550	Peptidoglycan biosynthesis	0.000607	0.0128	0.00125	0.0052	0.000133
Rv3332	-1.4014	-0.8565	-0.9003	-1.2934	-2.2376	nagA	Probable N-acetylglucosamine-6-phosphate deacetylase NagA (GlcNAc 6-P deacetylase)	cell wall and cell processes	mtu00520	Amino sugar and nucleotide sugar metabolism	0.00277	0.0178	0.00776	0.0112	4.14e-05
Rv3334	0.4925	0.0342	-0.3311	1.682	0.9924	Rv3334	Probable transcriptional regulatory protein (probably MerR-family)	regulatory proteins	NA	NA	0.373	0.954	0.00576	0.513	0.0428
Rv3340	-0.6524	-1.0174	-0.7955	-1.4269	-1.3299	metC	Probable O-acetylhomoserine sulfhydrylase MetC (homocysteine synthase) (O-acetylhomoserine (thiol)-lyase) (OAH sulfhydrylase) (O-acetyl-L-homoserine sulfhydrylase)	intermediary metabolism and respiration	mtu00270	Cysteine and methionine metabolism	0.146	0.0294	0.00673	0.0574	0.00345
Rv3342	1.0115	0.1084	0.1443	0.0575	0.0614	Rv3342	Possible methyltransferase (methylase)	intermediary metabolism and respiration	NA	NA	0.00793	0.78	0.917	0.679	0.864
Rv3354	0.2387	1.3384	1.4394	1.3169	1.5058	Rv3354	Conserved hypothetical protein	conserved hypotheticals	NA	NA	0.5	0.00045	0.0013	0.000138	6.32e-05
Rv3355c	0.2036	0.8759	0.8474	0.7969	1.0718	Rv3355c	Probable integral membrane protein	cell wall and cell processes	NA	NA	0.374	0.000544	0.00375	0.000466	3.99e-05
Rv3357	1.0364	0.6483	0.955	1.9849	1.2049	relJ	Antitoxin RelJ	virulence, detoxification, adaptation	NA	NA	0.0606	0.215	0.0012	0.0533	0.0169
Rv3358	0.4772	0.6382	0.586	1.3771	0.3739	relK	Toxin RelK	virulence, detoxification, adaptation	NA	NA	0.427	0.231	0.0196	0.248	0.483
Rv3371	-1.4694	-0.7821	-0.6442	-1.0328	-0.987	Rv3371	Possible triacylglycerol synthase (diacylglycerol acyltransferase)	lipid metabolism	mtu00561	Glycerolipid metabolism	0.00185	0.0455	0.0218	0.0694	0.00811
Rv3375	-0.3636	-0.5167	-0.4656	-1.1214	-0.8252	amiD	Probable amidase AmiD (acylamidase) (acylase)	intermediary metabolism and respiration	mtu00330	Arginine and proline metabolism	0.181	0.0424	0.00454	0.0513	0.00369
Rv3393	-0.8129	-0.5951	-0.3946	-1.2896	-1.1347	iunH	Probable nucleoside hydrolase IunH (purine nucleosidase)	intermediary metabolism and respiration	mtu00230	Purine metabolism	0.0726	0.128	0.0157	0.288	0.0102
Rv3397c	-0.2482	-0.7631	-0.4764	-0.4616	-1.0414	phyA	Probable phytoene synthase PhyA	intermediary metabolism and respiration	mtu00906	Carotenoid biosynthesis	0.605	0.0658	0.389	0.216	0.0198
Rv3406	0.9984	0.5966	0.6174	1.1877	0.6951	Rv3406	Probable dioxygenase	intermediary metabolism and respiration	NA	NA	0.0532	0.22	0.0402	0.177	0.124
Rv3415c	0.0185	0.2619	1.0281	0.8806	0.6841	Rv3415c	Conserved hypothetical protein	conserved hypotheticals	NA	NA	0.975	0.574	0.0547	0.0139	0.0875
Rv3417c	0.0225	-0.5189	-0.7768	-0.9372	-1.4665	groEL1	60 kDa chaperonin 1 GroEL1 (protein CPN60-1) (GroEL protein 1)	virulence, detoxification, adaptation	mtu03018	RNA degradation	0.967	0.245	0.0404	0.0625	0.00172
Rv3418c	-0.5422	-0.9708	-1.2747	-0.7644	-1.8595	groES	10 kDa chaperonin GroES (protein CPN10) (protein GroES) (BCG-a heat shock protein) (10 kDa antigen)	virulence, detoxification, adaptation	NA	NA	0.334	0.0786	0.139	0.0186	0.00157
Rv3447c	-0.6206	-0.4889	-0.4754	-1.0102	-0.5319	eccC4	ESX conserved component EccC4. ESX-4 type VII secretion system protein. Probable membrane protein.	cell wall and cell processes	NA	NA	0.0778	0.114	0.0146	0.11	0.0876
Rv3455c	0.2347	0.3296	0.6107	-1.0069	-0.1771	truA	Probable tRNA pseudouridine synthase a TruA (pseudouridylate synthase I) (pseudouridine synthase I) (uracil hydrolyase)	information pathways	NA	NA	0.396	0.196	0.00948	0.0151	0.475
Rv3457c	0.4356	0.8117	1.1114	0.325	0.5382	rpoA	Probable DNA-directed RNA polymerase (alpha chain) RpoA (transcriptase alpha chain) (RNA polymerase alpha subunit) (DNA-directed RNA nucleotidyltransferase)	information pathways	mtu03020	RNA polymerase	0.203	0.0243	0.323	0.00272	0.0722
Rv3463	-2.0267	-0.205	-0.3002	-1.8996	-2.2054	Rv3463	Conserved protein	conserved hypotheticals	NA	NA	0.0477	0.833	0.111	0.739	0.0198
Rv3469c	-0.131	-0.6818	-1.0144	0.1323	-0.9048	mhpE	Probable 4-hydroxy-2-oxovalerate aldolase MhpE (HOA)	intermediary metabolism and respiration	mtu00360	Phenylalanine metabolism	0.757	0.0525	0.777	0.0066	0.0149
Rv3473c	-0.5951	-0.1032	0.2156	-0.1813	-1.1847	bpoA	Possible peroxidase BpoA (non-haem peroxidase)	virulence, detoxification, adaptation	NA	NA	0.199	0.82	0.732	0.593	0.00887
Rv3486	0.1881	0.6333	1.0429	0.5482	0.8026	Rv3486	Conserved protein	conserved hypotheticals	NA	NA	0.555	0.0348	0.0772	0.00134	0.00478
Rv3487c	0.6428	1.0398	1.451	1.0858	1.4834	lipF	Probable esterase/lipase LipF	intermediary metabolism and respiration	NA	NA	0.0167	0.000739	0.000302	2.68e-05	8.49e-06
Rv3493c	-0.1697	-0.0595	-0.1085	-1.3834	-0.6678	Rv3493c	Conserved hypothetical Mce associated alanine and valine rich protein	conserved hypotheticals	NA	NA	0.685	0.885	0.0142	0.768	0.0591
Rv3494c	-0.3131	-0.4707	-0.7668	-1.1148	-0.9107	mce4F	Mce-family protein Mce4F	virulence, detoxification, adaptation	mtu02010	ABC transporters	0.434	0.197	0.0389	0.0325	0.0147
Rv3506	-0.2776	-0.265	-0.5365	-1.6427	-0.9073	fadD17	Fatty-acid-CoA synthetase FadD17 (fatty-acid-CoA synthase) (fatty-acid-CoA ligase)	lipid metabolism	NA	NA	0.56	0.539	0.00614	0.168	0.0363
Rv3517	-0.942	-0.4713	-0.1605	-1.2866	-1.4492	Rv3517	Conserved hypothetical protein	conserved hypotheticals	NA	NA	0.0904	0.34	0.0666	0.751	0.0111
Rv3518c	-0.6891	-0.2499	-0.2012	-1.0756	-1.5053	cyp142	Probable cytochrome P450 monooxygenase 142 Cyp142	intermediary metabolism and respiration	mtu00984	Steroid degradation	0.168	0.625	0.0934	0.665	0.00497
Rv3522	-0.7057	-0.3421	-0.2171	-1.0332	-1.0043	ltp4	Possible lipid transfer protein or keto acyl-CoA thiolase Ltp4	lipid metabolism	NA	NA	0.027	0.21	0.0136	0.408	0.00203
Rv3525c	-0.9671	-0.2978	-0.3363	-1.237	-0.7596	Rv3525c	Possible siderophore-binding protein	intermediary metabolism and respiration	NA	NA	0.0469	0.489	0.0294	0.396	0.0707
Rv3549c	-0.4442	-1.334	-1.2092	-0.8161	-1.177	Rv3549c	Probable short-chain type dehydrogenase/reductase	intermediary metabolism and respiration	NA	NA	0.353	0.00788	0.184	0.00942	0.0131
Rv3550	-0.8211	-1.0104	-1.0319	-0.3665	-2.0311	echA20	Probable enoyl-CoA hydratase EchA20 (enoyl hydrase) (unsaturated acyl-CoA hydratase) (crotonase)	lipid metabolism	NA	NA	0.24	0.102	0.661	0.0843	0.00808
Rv3560c	-0.2827	-0.3127	0.0424	-1.3443	-0.6409	fadE30	Probable acyl-CoA dehydrogenase FadE30	lipid metabolism	NA	NA	0.634	0.551	0.0307	0.937	0.199
Rv3571	-0.9703	-0.5387	-0.2184	-0.6214	-1.1774	kshB	Reductase component of 3-ketosteroid-9-alpha-hydroxylase KshB	intermediary metabolism and respiration	mtu00984	Steroid degradation	0.048	0.229	0.257	0.616	0.0109
Rv3577	-0.3091	-0.3351	-0.4125	-1.6735	-1.0524	Rv3577	Conserved hypothetical protein	conserved hypotheticals	NA	NA	0.361	0.265	0.000777	0.146	0.00297
Rv3578	-0.219	-0.5615	-0.6847	-1.1942	-0.9912	arsB2	Possible arsenical pump integral membrane protein ArsB2	cell wall and cell processes	NA	NA	0.483	0.0463	0.00611	0.0145	0.00226
Rv3587c	-0.7083	-0.3725	-0.4157	-1.0575	-0.7292	Rv3587c	Probable conserved membrane protein	cell wall and cell processes	NA	NA	0.0054	0.0991	0.000935	0.0504	0.00183
Rv3589	-0.5663	-0.419	-0.4254	-1.3274	-0.9012	mutY	Probable adenine glycosylase MutY	information pathways	mtu03410	Base excision repair	0.124	0.204	0.00881	0.174	0.0127
Rv3597c	0.2942	0.1802	-0.1161	1.0276	0.1388	lsr2	Iron-regulated H-NS-like protein Lsr2	information pathways	NA	NA	0.212	0.457	0.000457	0.608	0.515
Rv3609c	1.0953	0.1461	0.0977	1.2245	0.9844	folE	GTP cyclohydrolase I FolE (GTP-ch-I)	intermediary metabolism and respiration	mtu00790	Folate biosynthesis	0.000248	0.542	9.31e-05	0.664	0.000131
Rv3614c	0.415	0.9848	1.1146	0.9282	1.1397	espD	ESX-1 secretion-associated protein EspD	cell wall and cell processes	NA	NA	0.0691	0.000453	0.000312	7.87e-05	3.04e-05
Rv3615c	0.541	1.0802	1.3126	1.0909	1.2701	espC	ESX-1 secretion-associated protein EspC	cell wall and cell processes	NA	NA	0.023	0.00026	8.04e-05	2.47e-05	1.22e-05
Rv3616c	0.6242	1.2964	1.5638	1.2385	1.4687	espA	ESX-1 secretion-associated protein A, EspA	cell wall and cell processes	NA	NA	0.00982	4.74e-05	2.51e-05	4.95e-06	3.05e-06
Rv3647c	-0.5011	-0.6891	-0.3901	-1.6851	-1.2051	Rv3647c	Conserved hypothetical protein	conserved hypotheticals	NA	NA	0.132	0.029	0.00142	0.171	0.00131
Rv3652	-0.6111	-0.497	-0.6827	-0.4641	-1.0858	PE_PGRS60	PE-PGRS family-related protein PE_PGRS60	PE/PPE	NA	NA	0.314	0.363	0.464	0.179	0.048
Rv3660c	-1.083	-0.8859	-0.3983	-1.5122	-1.3982	Rv3660c	Conserved hypothetical protein	virulence, detoxification, adaptation	NA	NA	0.0131	0.0192	0.0105	0.232	0.00157
Rv3664c	-0.3011	-0.4182	-0.4434	-1.0174	-0.4529	dppC	Probable dipeptide-transport integral membrane protein ABC transporter DppC	cell wall and cell processes	mtu01501	beta-Lactam resistance	0.477	0.256	0.0226	0.203	0.212
Rv3704c	0.5724	1.08	1.3326	1.0824	1.2392	gshA	Glutamate--cysteine ligase GshA (gamma-glutamylcysteine synthetase) (gamma-ECS) (GCS) (gamma-glutamyl-L-cysteine synthetase)	intermediary metabolism and respiration	mtu00270	Cysteine and methionine metabolism	0.0251	0.000363	0.000513	3.02e-05	3.03e-05
Rv3710	1.1857	1.7482	1.9834	1.848	2.1442	leuA	2-isopropylmalate synthase LeuA (alpha-isopropylmalate synthase) (alpha-IPM synthetase) (IPMS)	intermediary metabolism and respiration	mtu00290	Valine, leucine and isoleucine biosynthesis	0.000347	1.01e-05	1.88e-06	2.96e-06	2.33e-07
Rv3711c	0.9944	1.2784	1.4703	1.4173	1.7439	dnaQ	Probable DNA polymerase III (epsilon subunit) DnaQ	information pathways	mtu03030	DNA replication	0.000351	4.21e-05	1.06e-05	6.39e-06	3.91e-07
Rv3712	-0.859	-0.0914	-0.1328	-1.3347	-0.9441	Rv3712	Possible ligase	intermediary metabolism and respiration	mtu00550	Peptidoglycan biosynthesis	0.0176	0.784	0.0073	0.66	0.00562
Rv3713	-0.2623	-0.362	0.0468	-1.0055	-0.7841	cobQ2	Possible cobyric acid synthase CobQ2	intermediary metabolism and respiration	mtu00550	Peptidoglycan biosynthesis	0.397	0.186	0.0128	0.869	0.00945
Rv3718c	-0.5211	-0.202	-0.3635	-1.1869	-0.4985	Rv3718c	Conserved protein	conserved hypotheticals	NA	NA	0.11	0.509	0.00621	0.189	0.0886
Rv3734c	0.4337	0.6656	0.5976	1.035	0.9408	tgs2	Putative triacylglycerol synthase (diacylglycerol acyltransferase) Tgs2	lipid metabolism	mtu00561	Glycerolipid metabolism	0.0377	0.00347	8.46e-05	0.00422	6.86e-05
Rv3750c	0.1757	0.5863	0.5563	1.0318	0.9862	Rv3750c	Possible excisionase	insertion seqs and phages	NA	NA	0.497	0.0217	0.000274	0.0181	0.000221
Rv3763	-1.0439	-0.7199	-0.454	-0.9835	-0.9589	lpqH	19 kDa lipoprotein antigen precursor LpqH	cell wall and cell processes	mtu05152	Tuberculosis	0.00112	0.00817	0.00659	0.0525	0.000684
Rv3765c	0.2033	0.7985	0.9967	0.616	1.0037	tcrX	Probable two component transcriptional regulatory protein TcrX	regulatory proteins	NA	NA	0.503	0.00585	0.0654	0.000833	0.000603
Rv3766	1.2189	1.5871	1.9514	1.9754	2.0941	Rv3766	Hypothetical protein	conserved hypotheticals	NA	NA	0.00167	0.000201	3.56e-05	2.07e-05	4.89e-06
Rv3767c	1.1626	1.7577	2.1177	1.9707	2.3163	Rv3767c	Possible S-adenosylmethionine-dependent methyltransferase	lipid metabolism	NA	NA	0.000233	5.69e-06	1.1e-06	5.2e-07	8.09e-08
Rv3771c	-0.5622	-0.2376	0.0474	-1.0268	-0.4136	Rv3771c	Conserved hypothetical protein	conserved hypotheticals	NA	NA	0.102	0.456	0.0213	0.88	0.174
Rv3778c	0.3431	0.8955	1.2331	0.6824	1.0107	Rv3778c	Possible aminotransferase	intermediary metabolism and respiration	NA	NA	0.134	0.000874	0.00803	3.43e-05	0.000102
Rv3787c	-0.5309	-0.1908	-0.3686	-1.5259	-0.805	Rv3787c	Conserved hypothetical protein	conserved hypotheticals	NA	NA	0.15	0.591	0.00198	0.238	0.0222
Rv3792	-0.499	-0.3094	-0.4451	-1.042	-1.0472	aftA	Arabinofuranosyltransferase AftA	cell wall and cell processes	mtu00572	Arabinogalactan biosynthesis - Mycobacterium	0.0704	0.212	0.00813	0.0613	0.000664
Rv3793	-0.609	-0.4319	-0.492	-0.858	-1.0447	embC	Integral membrane indolylacetylinositol arabinosyltransferase EmbC (arabinosylindolylacetylinositol synthase)	cell wall and cell processes	mtu00571	Lipoarabinomannan (LAM) biosynthesis	0.0148	0.0567	0.00574	0.0233	0.000142
Rv3794	-0.7301	-0.3464	-0.3362	-1.2885	-1.1577	embA	Integral membrane indolylacetylinositol arabinosyltransferase EmbA (arabinosylindolylacetylinositol synthase)	cell wall and cell processes	mtu00572	Arabinogalactan biosynthesis - Mycobacterium	0.00294	0.101	0.000128	0.0896	2.64e-05
Rv3795	-0.5789	-0.3486	-0.4078	-1.4116	-1.1177	embB	Integral membrane indolylacetylinositol arabinosyltransferase EmbB (arabinosylindolylacetylinositol synthase)	cell wall and cell processes	mtu00572	Arabinogalactan biosynthesis - Mycobacterium	0.00896	0.081	4.28e-05	0.0326	1.96e-05
Rv3807c	-0.2518	-0.5403	-0.5816	-0.9142	-1.3533	Rv3807c	Possible conserved transmembrane protein	cell wall and cell processes	NA	NA	0.45	0.0665	0.0262	0.0402	0.000461
Rv3822	0.4442	1.0915	1.3267	1.2789	1.64	Rv3822	Conserved hypothetical protein	conserved hypotheticals	NA	NA	0.0738	0.000401	4.3e-05	3.96e-05	2.77e-06
Rv3824c	0.7099	1.6584	1.6625	1.6086	1.818	papA1	Conserved polyketide synthase associated protein PapA1	lipid metabolism	NA	NA	0.0739	0.00082	0.000523	0.000466	0.000111
Rv3825c	0.9328	1.638	1.8808	1.5457	1.8485	pks2	Polyketide synthase Pks2	lipid metabolism	NA	NA	0.0129	0.00035	0.000201	5.47e-05	2.72e-05
Rv3833	-0.9007	-0.5856	-0.8826	-0.6656	-1.2628	Rv3833	Transcriptional regulatory protein (probably AraC-family)	regulatory proteins	NA	NA	0.13	0.301	0.321	0.0975	0.0251
Rv3850	0.1788	0.7682	1.066	0.4597	0.6601	Rv3850	Conserved protein	conserved hypotheticals	NA	NA	0.487	0.0031	0.102	0.000138	0.00444
Rv3859c	0.9229	0.9254	0.96	1.0073	1.1147	gltB	Probable ferredoxin-dependent glutamate synthase [NADPH] (large subunit) GltB (L-glutamate synthase) (L-glutamate synthetase) (NADH-glutamate synthase) (glutamate synthase (NADH))(NADPH-GOGAT)	intermediary metabolism and respiration	mtu00250	Alanine, aspartate and glutamate metabolism	0.000276	0.000218	3.56e-05	6.85e-05	8.49e-06
Rv3865	0.7555	0.3944	0.2697	1.1584	0.95	espF	ESX-1 secretion-associated protein EspF	cell wall and cell processes	NA	NA	0.00198	0.0618	5.88e-05	0.165	9.34e-05
Rv3872	0.823	0.4776	-0.0227	1.411	0.6229	PE35	PE family-related protein PE35	PE/PPE	NA	NA	0.000347	0.0125	1.66e-06	0.902	0.000792
Rv3873	0.737	0.4681	0.3452	1.0242	0.69	PPE68	PPE family protein PPE68	PE/PPE	NA	NA	0.00137	0.0218	5.06e-05	0.0572	0.000681
Rv3881c	0.5709	0.7947	0.8946	1.0688	1.0807	espB	Secreted ESX-1 substrate protein B, EspB. Conserved alanine and glycine rich protein	cell wall and cell processes	NA	NA	0.00383	0.000386	1.72e-05	6.81e-05	5.99e-06
Rv3892c	0.3457	1.1333	1.2236	0.2012	0.8153	PPE69	PPE family protein PPE69	PE/PPE	NA	NA	0.461	0.00915	0.736	0.00424	0.0394
Rv3909	-0.2547	-0.1241	-0.1753	-1.0287	-0.5629	Rv3909	Conserved protein	conserved hypotheticals	NA	NA	0.145	0.492	0.000148	0.268	0.00162
Rv3920c	-0.3022	-0.7698	-0.8274	-1.4822	-1.6858	Rv3920c	Conserved protein similar to jag protein	conserved hypotheticals	NA	NA	0.416	0.0316	0.00698	0.0162	0.000185
Rv3921c	-0.6461	-0.8185	-0.8369	-1.7872	-1.7762	Rv3921c	Probable conserved transmembrane protein	cell wall and cell processes	mtu02024	Quorum sensing	0.0354	0.0101	6.63e-05	0.00574	9.67e-06
Rv3922c	-0.4141	-0.4831	-0.4089	-1.5346	-1.5772	Rv3922c	Possible hemolysin	virulence, detoxification, adaptation	NA	NA	0.0654	0.0271	0.000153	0.0412	3.79e-06
Rv3923c	-0.361	-0.0977	0.0595	-1.1512	-0.8473	rnpA	Ribonuclease P protein component RnpA (RNaseP protein) (RNase P protein) (protein C5)	information pathways	NA	NA	0.176	0.745	0.000715	0.826	0.0016

## Sheet: Table S4b
Supplementary Table 4b (Table S4b): DEGs under all treatment conditions (Only identified DEGs of indicated conditions were labelled with Log fold change and P-value, others were labelled with NA). Locus in orange: common DEGs shared between all treatments
Locus	Name	BDQ-logFC	BDQ-Pvalue	LYN1D-logFC	LYN1D-Pvalue	BDQ-LYN1D-logFC	BDQ-LYN1D-Pvalue	LYN3D-logFC	LYN3D-Pvalue	BDQ-LYN3D-logFC	BDQ-LYN3D-Pvalue
Rv0027	Rv0027	NA	NA	NA	NA	1.411	0.000127	NA	NA	1	0.000426
Rv0028	Rv0028	NA	NA	NA	NA	1.0446	0.000457	NA	NA	1.2278	1.22e-05
Rv0040c	mtc28	-1.0675	0.000233	NA	NA	NA	NA	NA	NA	NA	NA
Rv0054	ssb	NA	NA	NA	NA	NA	NA	1.1101	0.00147	NA	NA
Rv0056	rplI	NA	NA	NA	NA	NA	NA	1.0109	0.00189	NA	NA
Rv0062	celA1	NA	NA	NA	NA	-1.3086	0.00304	NA	NA	-1.1634	0.000314
Rv0064	Rv0064	1.0986	0.00266	NA	NA	1.1892	0.00106	NA	NA	NA	NA
Rv0069c	sdaA	NA	NA	NA	NA	-1.0367	0.00531	NA	NA	NA	NA
Rv0083	Rv0083	NA	NA	NA	NA	-1.2757	0.00786	NA	NA	-1.1804	0.000613
Rv0084	hycD	NA	NA	NA	NA	-1.3306	0.0139	NA	NA	-1.107	0.0041
Rv0087	hycE	NA	NA	NA	NA	-1.0931	0.0035	NA	NA	-1.0335	0.000349
Rv0095c	Rv0095c	NA	NA	NA	NA	1.5484	0.00579	NA	NA	NA	NA
Rv0100	Rv0100	NA	NA	NA	NA	-1.3667	0.0297	NA	NA	-1.1934	0.0229
Rv0101	nrp	NA	NA	-1.1078	4.74e-05	-1.2886	1.69e-05	-1.1716	1.85e-05	-1.1667	7.42e-06
Rv0112	gca	NA	NA	1.5063	0.000457	NA	NA	1.7409	7.39e-05	1.3942	0.000232
Rv0113	gmhA	NA	NA	1.4796	0.000743	1.1457	0.00768	1.6362	0.000192	1.3898	0.000438
Rv0114	gmhB	NA	NA	1.6419	0.000419	1.3228	0.00576	1.8393	9.66e-05	1.2402	0.00177
Rv0115	hddA	NA	NA	1.528	0.000891	1.1431	0.0157	1.6209	0.000374	1.2008	0.00261
Rv0116c	ldtA	NA	NA	NA	NA	1.2849	8.22e-06	NA	NA	1.0124	1.51e-05
Rv0117	oxyS	1.157	0.000529	NA	NA	NA	NA	NA	NA	1.1694	0.000143
Rv0118c	oxcA	2.3448	0.000503	NA	NA	2.1366	0.000772	NA	NA	2.2166	0.000195
Rv0119	fadD7	1.2921	0.00318	NA	NA	NA	NA	NA	NA	1.046	0.00589
Rv0122	Rv0122	NA	NA	NA	NA	1.6421	4.45e-05	NA	NA	1.2273	0.000125
Rv0147	Rv0147	NA	NA	NA	NA	1.0782	1.06e-05	NA	NA	1.0639	5.38e-06
Rv0165c	mce1R	NA	NA	NA	NA	NA	NA	1.0524	0.000147	NA	NA
Rv0169	mce1A	NA	NA	NA	NA	-1.2709	0.0129	NA	NA	NA	NA
Rv0171	mce1C	NA	NA	NA	NA	-1.2483	0.00711	NA	NA	-1.2799	0.00166
Rv0172	mce1D	NA	NA	NA	NA	-1.3298	0.00114	NA	NA	-1.1374	0.000655
Rv0173	lprK	NA	NA	NA	NA	-1.0268	0.0365	NA	NA	-1.0196	0.0133
Rv0174	mce1F	NA	NA	NA	NA	-1.0965	0.00199	NA	NA	-1.0071	0.00127
Rv0179c	lprO	-1.0083	7.21e-05	NA	NA	NA	NA	NA	NA	NA	NA
Rv0186	bglS	NA	NA	-1.2005	0.0149	NA	NA	-1.2238	0.00884	-1.0776	0.0124
Rv0186A	mymT	1.0474	0.0278	NA	NA	2.1324	0.000201	NA	NA	NA	NA
Rv0188	Rv0188	1.3549	7.92e-05	NA	NA	1.6311	9.9e-06	NA	NA	1.3602	1.22e-05
Rv0211	pckA	NA	NA	NA	NA	1.5224	1.06e-05	NA	NA	1.4999	6.99e-06
Rv0225	Rv0225	NA	NA	NA	NA	NA	NA	NA	NA	-1.1862	0.000899
Rv0226c	Rv0226c	NA	NA	NA	NA	-1.782	0.00347	NA	NA	NA	NA
Rv0236c	aftD	NA	NA	NA	NA	-1.0132	0.000826	NA	NA	NA	NA
Rv0244c	fadE5	1.1937	0.0293	NA	NA	1.7357	0.00253	1.1451	0.0233	1.8713	0.00096
Rv0251c	hsp	2.9815	0.0126	NA	NA	2.4753	0.0189	NA	NA	2.0073	0.0348
Rv0258c	Rv0258c	NA	NA	NA	NA	1.0406	0.0229	NA	NA	NA	NA
Rv0260c	Rv0260c	-1.7585	0.0067	-1.3873	0.0125	NA	NA	-1.8159	0.00212	-1.8201	0.00177
Rv0262c	aac	NA	NA	NA	NA	NA	NA	NA	NA	1.058	0.0014
Rv0263c	Rv0263c	NA	NA	NA	NA	1.0099	0.000846	NA	NA	1.1305	3.86e-05
Rv0264c	Rv0264c	NA	NA	1.4899	0.000347	1.2756	0.0034	1.37	0.000399	1.7125	3.45e-05
Rv0270	fadD2	NA	NA	NA	NA	1.0567	0.000262	NA	NA	1.0837	8.51e-05
Rv0274	Rv0274	NA	NA	NA	NA	1.0137	0.0012	NA	NA	NA	NA
Rv0275c	Rv0275c	NA	NA	NA	NA	1.02	0.000288	NA	NA	NA	NA
Rv0283	eccB3	1.0507	0.000241	NA	NA	NA	NA	NA	NA	NA	NA
Rv0303	Rv0303	NA	NA	NA	NA	NA	NA	NA	NA	-1.0261	0.00353
Rv0306	Rv0306	1.4277	0.00057	1.7849	6.04e-05	1.9525	4.82e-05	1.8208	3.02e-05	2.067	5.38e-06
Rv0307c	Rv0307c	NA	NA	1.0837	0.000956	1.56	0.000119	NA	NA	1.3217	8.54e-05
Rv0311	Rv0311	1.2314	0.000352	NA	NA	1.9684	6.31e-06	NA	NA	1.7203	4.71e-06
Rv0312	Rv0312	-1.0103	0.00288	NA	NA	NA	NA	NA	NA	NA	NA
Rv0336	Rv0336	NA	NA	NA	NA	1.1818	3.78e-06	NA	NA	1.2674	3.87e-07
Rv0341	iniB	NA	NA	-1.4832	0.0031	NA	NA	NA	NA	NA	NA
Rv0344c	lpqJ	NA	NA	NA	NA	NA	NA	NA	NA	-1.0994	0.00347
Rv0358	Rv0358	NA	NA	NA	NA	NA	NA	NA	NA	-1.4583	0.00371
Rv0367c	Rv0367c	NA	NA	NA	NA	1.4569	0.00128	NA	NA	NA	NA
Rv0370c	Rv0370c	NA	NA	NA	NA	NA	NA	-1.0099	0.0322	NA	NA
Rv0378	Rv0378	NA	NA	NA	NA	NA	NA	-1.1432	0.0147	NA	NA
Rv0390	Rv0390	NA	NA	NA	NA	NA	NA	1.336	7.24e-05	NA	NA
Rv0396	Rv0396	NA	NA	NA	NA	-1.7801	0.00881	NA	NA	-1.5164	0.0128
Rv0405	pks6	NA	NA	NA	NA	NA	NA	NA	NA	-1.002	1.32e-05
Rv0421c	Rv0421c	NA	NA	NA	NA	-2.0292	0.00573	-1.0474	0.0364	NA	NA
Rv0430	Rv0430	NA	NA	NA	NA	-1.0948	0.000513	NA	NA	NA	NA
Rv0440	groEL2	NA	NA	NA	NA	-1.0599	0.0399	NA	NA	-1.7663	0.00175
Rv0447c	ufaA1	NA	NA	NA	NA	NA	NA	1.1089	0.00207	NA	NA
Rv0448c	Rv0448c	NA	NA	NA	NA	NA	NA	1.4116	0.0145	1.0979	0.0447
Rv0449c	Rv0449c	1.3821	0.00912	1.3471	0.0087	1.327	0.0159	1.9547	0.000466	1.3938	0.00398
Rv0459	Rv0459	NA	NA	NA	NA	-1.1723	0.00145	NA	NA	NA	NA
Rv0467	icl1	1.5241	0.00113	1.0861	0.00912	2.2813	2.09e-05	1.2375	0.00264	2.4573	6.43e-06
Rv0468	fadB2	NA	NA	NA	NA	1.3873	4.22e-05	NA	NA	1.6037	5.38e-06
Rv0499	Rv0499	NA	NA	NA	NA	-1.4052	0.0424	NA	NA	NA	NA
Rv0503c	cmaA2	NA	NA	NA	NA	NA	NA	1.0982	9.92e-05	NA	NA
Rv0515	Rv0515	NA	NA	1.0572	1.01e-05	1.246	1.66e-06	1.0516	4.95e-06	1.5066	8.09e-08
Rv0516c	Rv0516c	NA	NA	1.2336	2.56e-05	1.3258	6.62e-06	1.2263	1.11e-05	1.8011	1.21e-07
Rv0528	Rv0528	NA	NA	-1.0803	0.00551	NA	NA	-1.2279	0.00166	NA	NA
Rv0532	PE_PGRS6	NA	NA	NA	NA	-1.3018	0.00264	NA	NA	NA	NA
Rv0549c	vapC3	1.3521	0.000616	NA	NA	1.333	0.00136	NA	NA	1.2722	0.00032
Rv0550c	vapB3	1.1653	0.029	NA	NA	1.9307	0.00147	NA	NA	NA	NA
Rv0553	menC	NA	NA	NA	NA	-1.2369	0.0059	NA	NA	NA	NA
Rv0560c	Rv0560c	1.6759	5.74e-06	NA	NA	1.5139	2.51e-05	NA	NA	1.0228	0.000152
Rv0563	htpX	1.6424	0.00137	NA	NA	1.3752	0.00339	NA	NA	NA	NA
Rv0564c	gpdA1	1.2896	0.0031	NA	NA	NA	NA	NA	NA	NA	NA
Rv0580c	Rv0580c	1.0974	0.000347	NA	NA	1.4565	2.69e-05	NA	NA	1.5382	2.87e-06
Rv0592	mce2D	NA	NA	NA	NA	-1.3283	0.0356	NA	NA	NA	NA
Rv0600c	Rv0600c	NA	NA	NA	NA	NA	NA	NA	NA	-1.1839	0.0197
Rv0608	vapB28	NA	NA	NA	NA	1.0392	0.000457	NA	NA	NA	NA
Rv0609	vapC28	NA	NA	NA	NA	1.0227	0.00308	NA	NA	NA	NA
Rv0614	Rv0614	NA	NA	NA	NA	-2.2138	0.00314	NA	NA	NA	NA
Rv0618	galTa	NA	NA	NA	NA	NA	NA	NA	NA	-1.3047	0.00161
Rv0623	vapB30	NA	NA	NA	NA	1.0799	0.0231	NA	NA	NA	NA
Rv0651	rplJ	NA	NA	NA	NA	NA	NA	1.3074	0.00145	NA	NA
Rv0652	rplL	NA	NA	NA	NA	NA	NA	1.1682	0.00482	NA	NA
Rv0653c	Rv0653c	NA	NA	NA	NA	NA	NA	1.0549	0.00189	NA	NA
Rv0656c	vapC6	NA	NA	NA	NA	NA	NA	1.1983	0.000218	NA	NA
Rv0670	end	1.047	0.00112	NA	NA	1.2509	0.00021	NA	NA	1.0937	0.000218
Rv0678	Rv0678	NA	NA	NA	NA	1.2087	0.000282	NA	NA	1.0853	0.000193
Rv0690c	Rv0690c	NA	NA	NA	NA	-1.0709	0.00354	NA	NA	NA	NA
Rv0695	Rv0695	NA	NA	NA	NA	-1.03	0.00601	NA	NA	-1.0758	0.00022
Rv0696	Rv0696	NA	NA	NA	NA	-1.804	0.0038	NA	NA	-1.688	0.000341
Rv0697	Rv0697	NA	NA	NA	NA	-1.8509	0.00697	-1.0873	0.0389	-1.1936	0.0349
Rv0698	Rv0698	NA	NA	NA	NA	NA	NA	NA	NA	-1.3174	0.000355
Rv0700	rpsJ	NA	NA	NA	NA	-1.186	0.000282	NA	NA	NA	NA
Rv0701	rplC	NA	NA	NA	NA	-1.2814	0.00326	NA	NA	NA	NA
Rv0702	rplD	NA	NA	NA	NA	-1.3775	0.00199	NA	NA	-1.0655	0.00337
Rv0703	rplW	NA	NA	NA	NA	-1.1476	0.00508	NA	NA	NA	NA
Rv0704	rplB	NA	NA	NA	NA	-1.0118	0.0163	NA	NA	NA	NA
Rv0705	rpsS	NA	NA	NA	NA	-1.2926	0.00373	NA	NA	NA	NA
Rv0706	rplV	NA	NA	NA	NA	-1.3185	0.00649	NA	NA	NA	NA
Rv0707	rpsC	NA	NA	NA	NA	-1.2046	0.00781	NA	NA	NA	NA
Rv0714	rplN	NA	NA	NA	NA	-1.0938	0.000421	NA	NA	NA	NA
Rv0715	rplX	NA	NA	NA	NA	-1.4521	0.00016	NA	NA	NA	NA
Rv0726c	Rv0726c	NA	NA	1.1861	0.000401	1.0432	0.00116	1.2833	0.000106	1.108	0.000197
Rv0743c	Rv0743c	NA	NA	NA	NA	1.2909	0.000664	NA	NA	NA	NA
Rv0744c	Rv0744c	NA	NA	1.0153	0.00851	1.9551	8.81e-05	NA	NA	1.0626	0.00388
Rv0754	PE_PGRS11	1.1164	0.0241	NA	NA	1.2614	0.0189	NA	NA	NA	NA
Rv0757	phoP	NA	NA	NA	NA	1.1543	0.0013	NA	NA	NA	NA
Rv0762c	Rv0762c	1.0535	0.0121	NA	NA	1.0612	0.0237	NA	NA	NA	NA
Rv0763c	Rv0763c	1.6077	0.00137	NA	NA	1.9046	0.000398	NA	NA	1.0647	0.0106
Rv0768	aldA	NA	NA	NA	NA	NA	NA	NA	NA	-2.2712	0.0208
Rv0771	Rv0771	NA	NA	NA	NA	NA	NA	1.0287	0.0349	NA	NA
Rv0772	purD	NA	NA	NA	NA	-1.0194	0.00665	NA	NA	NA	NA
Rv0779c	Rv0779c	NA	NA	NA	NA	-1.3785	0.0249	NA	NA	NA	NA
Rv0785	Rv0785	NA	NA	NA	NA	-1.1635	0.00493	NA	NA	NA	NA
Rv0791c	Rv0791c	NA	NA	NA	NA	NA	NA	NA	NA	-1.6812	0.0409
Rv0792c	Rv0792c	NA	NA	NA	NA	NA	NA	NA	NA	-1.503	0.0464
Rv0804	Rv0804	NA	NA	NA	NA	-1.3858	0.0267	NA	NA	NA	NA
Rv0807	Rv0807	NA	NA	NA	NA	1.0775	0.00793	NA	NA	NA	NA
Rv0821c	phoY2	NA	NA	NA	NA	1.3355	1.85e-06	NA	NA	1.2718	9.31e-07
Rv0827c	kmtR	NA	NA	NA	NA	1.223	0.00857	NA	NA	NA	NA
Rv0833	PE_PGRS13	NA	NA	NA	NA	-1.3242	0.00962	NA	NA	NA	NA
Rv0838	lpqR	NA	NA	NA	NA	-1.0429	0.026	NA	NA	NA	NA
Rv0848	cysK2	NA	NA	-1.0345	0.0221	NA	NA	NA	NA	-1.3	0.00438
Rv0873	fadE10	NA	NA	NA	NA	1.0377	3.56e-05	NA	NA	1.0935	9.67e-06
Rv0880	Rv0880	NA	NA	NA	NA	-1.7462	0.0274	NA	NA	NA	NA
Rv0881	Rv0881	NA	NA	NA	NA	-1.209	0.00148	NA	NA	NA	NA
Rv0885	Rv0885	-1.5756	0.00392	-1.2281	0.0162	NA	NA	NA	NA	NA	NA
Rv0886	fprB	-1.1268	0.00592	NA	NA	NA	NA	NA	NA	NA	NA
Rv0890c	Rv0890c	NA	NA	NA	NA	-1.0696	0.00469	NA	NA	-1.1983	0.000125
Rv0891c	Rv0891c	NA	NA	NA	NA	-1.1278	0.00977	NA	NA	NA	NA
Rv0892	Rv0892	NA	NA	-1.0354	0.0084	-1.0778	0.0316	NA	NA	-1.4693	0.000664
Rv0898c	Rv0898c	1.1865	0.00166	NA	NA	2.1559	1.06e-05	NA	NA	1.577	4.81e-05
Rv0924c	mntH	NA	NA	NA	NA	-1.1094	0.00785	NA	NA	NA	NA
Rv0942	Rv0942	NA	NA	NA	NA	1.2932	0.000983	NA	NA	NA	NA
Rv0967	csoR	NA	NA	NA	NA	1.9884	0.000942	NA	NA	NA	NA
Rv0968	Rv0968	1.1673	0.0121	NA	NA	2.1795	0.000142	NA	NA	NA	NA
Rv0969	ctpV	1.19	0.00416	NA	NA	NA	NA	NA	NA	NA	NA
Rv0972c	fadE12	NA	NA	-1.2334	0.013	NA	NA	-1.113	0.0164	NA	NA
Rv0973c	accA2	NA	NA	-1.1564	0.0483	NA	NA	NA	NA	NA	NA
Rv0974c	accD2	NA	NA	-1.1389	0.0217	NA	NA	-1.325	0.00841	NA	NA
Rv0975c	fadE13	NA	NA	-1.5758	0.00822	NA	NA	-1.7866	0.00356	NA	NA
Rv0976c	Rv0976c	NA	NA	-1.3277	0.0251	NA	NA	-1.3194	0.0205	NA	NA
Rv0981	mprA	NA	NA	NA	NA	1.4069	1.45e-05	NA	NA	1.402	2.87e-06
Rv0982	mprB	NA	NA	NA	NA	1.1587	0.000287	NA	NA	NA	NA
Rv0983	pepD	1.1736	0.000787	NA	NA	NA	NA	NA	NA	NA	NA
Rv0984	moaB2	1.228	0.000233	NA	NA	NA	NA	NA	NA	NA	NA
Rv0990c	Rv0990c	NA	NA	NA	NA	NA	NA	NA	NA	-2.2412	0.00631
Rv0991c	Rv0991c	NA	NA	NA	NA	NA	NA	NA	NA	-1.8414	0.00671
Rv0997	Rv0997	NA	NA	NA	NA	NA	NA	NA	NA	1.1331	0.000897
Rv1008	tatD	NA	NA	NA	NA	-1.2404	0.00573	NA	NA	NA	NA
Rv1010	ksgA	NA	NA	NA	NA	-1.1018	0.00301	NA	NA	-1.0401	0.000231
Rv1024	Rv1024	NA	NA	NA	NA	-1.0808	0.00507	NA	NA	NA	NA
Rv1025	Rv1025	NA	NA	NA	NA	-1.7589	0.00659	NA	NA	NA	NA
Rv1026	Rv1026	NA	NA	NA	NA	-1.3378	0.0013	NA	NA	-1.1938	0.000153
Rv1029	kdpA	NA	NA	NA	NA	NA	NA	NA	NA	1.2879	0.000107
Rv1039c	PPE15	-1.1046	0.0251	NA	NA	-1.5864	0.0136	NA	NA	-1.2209	0.00863
Rv1040c	PE8	-1.7723	0.0021	NA	NA	NA	NA	-1.0205	0.0141	-1.3758	0.00358
Rv1045	Rv1045	NA	NA	NA	NA	NA	NA	-1.0988	0.00207	-1.1967	0.00101
Rv1057	Rv1057	NA	NA	NA	NA	1.2047	0.00563	NA	NA	1.4117	0.000536
Rv1065	Rv1065	NA	NA	1.1061	0.00074	1.2285	0.000265	1.3518	7.24e-05	1.535	1.12e-05
Rv1068c	PE_PGRS20	NA	NA	NA	NA	-2.0254	0.00227	NA	NA	-1.2928	0.0198
Rv1075c	Rv1075c	NA	NA	NA	NA	1.2275	0.00603	NA	NA	NA	NA
Rv1078	pra	NA	NA	NA	NA	-1.0319	4.3e-05	NA	NA	NA	NA
Rv1082	mca	NA	NA	NA	NA	1.0411	0.000104	NA	NA	NA	NA
Rv1083	Rv1083	NA	NA	NA	NA	1.037	0.0038	NA	NA	NA	NA
Rv1120c	Rv1120c	NA	NA	NA	NA	NA	NA	NA	NA	-1.1723	0.0196
Rv1121	zwf1	NA	NA	NA	NA	NA	NA	-1.0536	0.00113	NA	NA
Rv1123c	bpoB	NA	NA	NA	NA	-1.0798	0.00409	NA	NA	NA	NA
Rv1128c	Rv1128c	1.1507	0.000633	1.2084	0.000337	1.8924	1.01e-05	NA	NA	1.8149	2.77e-06
Rv1129c	Rv1129c	2.7033	3.01e-06	2.9621	4.22e-06	3.5325	2.92e-07	2.5976	3.47e-06	3.5584	8.09e-08
Rv1130	prpD	2.4631	1.39e-05	3.0725	4.55e-06	3.5227	3.63e-07	2.6099	4.95e-06	3.557	1.21e-07
Rv1131	prpC	2.8473	1.39e-05	3.1463	8.3e-06	3.7245	1.04e-06	2.5315	2.07e-05	3.6404	3.59e-07
Rv1144	Rv1144	NA	NA	1.3354	7.48e-06	1.1315	9.9e-06	1.6354	5.2e-07	1.5591	1.97e-07
Rv1158c	Rv1158c	-1.0133	0.00707	NA	NA	NA	NA	NA	NA	NA	NA
Rv1159A	Rv1159A	1.0339	0.00277	NA	NA	1.3118	0.000959	NA	NA	1.3561	0.000104
Rv1168c	PPE17	-1.7324	0.0422	NA	NA	-1.8111	0.0316	NA	NA	-1.9279	0.0128
Rv1169c	lipX	-2.295	0.0249	NA	NA	-1.9699	0.0442	NA	NA	-2.3974	0.00959
Rv1180	pks3	NA	NA	1.8899	2.99e-05	1.7786	2.6e-05	2.145	4.95e-06	2.1702	1.52e-06
Rv1181	pks4	NA	NA	1.6935	0.000113	1.6131	5.5e-05	1.8903	2.19e-05	1.9658	5.99e-06
Rv1182	papA3	NA	NA	1.3598	0.000201	1.3296	9.22e-05	1.3581	8.41e-05	1.5574	1.16e-05
Rv1184c	Rv1184c	NA	NA	1.0044	0.000475	1.2394	3.93e-05	1.0473	0.000168	1.5418	2.77e-06
Rv1185c	fadD21	NA	NA	NA	NA	NA	NA	NA	NA	1.1239	0.000135
Rv1194c	Rv1194c	NA	NA	NA	NA	1.1338	0.000336	NA	NA	1.2398	8.4e-05
Rv1218c	Rv1218c	-1.0884	0.0241	NA	NA	NA	NA	NA	NA	NA	NA
Rv1219c	Rv1219c	-1.3188	0.00198	-1.0914	0.00457	NA	NA	-1.05037	0.00371	-1.2811	0.000899
Rv1220c	Rv1220c	-1.1058	0.00959	NA	NA	-1.4485	0.00677	NA	NA	NA	NA
Rv1239c	corA	NA	NA	1.2046	0.00213	1.2807	0.00207	1.269	0.000964	1.4667	0.000168
Rv1252c	lprE	-1.4904	0.0232	NA	NA	-2.388	0.00698	NA	NA	-1.448	0.0147
Rv1271c	Rv1271c	NA	NA	NA	NA	-1.1264	0.0157	NA	NA	NA	NA
Rv1284	canA	NA	NA	1.7347	0.000337	1.7124	0.000351	1.8244	0.000106	1.6689	0.000123
Rv1286	cysN	NA	NA	NA	NA	1.412	2.72e-05	NA	NA	1.2459	4.96e-05
Rv1291c	Rv1291c	NA	NA	NA	NA	-1.7861	0.00385	NA	NA	NA	NA
Rv1296	thrB	NA	NA	NA	NA	NA	NA	NA	NA	-1.5589	0.00727
Rv1344	mbtL	NA	NA	NA	NA	1.4165	0.0106	NA	NA	1.0714	0.0187
Rv1361c	PPE19	-1.0003	0.0146	NA	NA	NA	NA	NA	NA	NA	NA
Rv1372	Rv1372	NA	NA	NA	NA	1.1632	0.00111	NA	NA	NA	NA
Rv1381	pyrC	NA	NA	NA	NA	-1.4095	0.000785	NA	NA	NA	NA
Rv1395	Rv1395	1.0967	0.016	NA	NA	NA	NA	NA	NA	NA	NA
Rv1403c	Rv1403c	NA	NA	NA	NA	1.155	0.00314	NA	NA	NA	NA
Rv1405c	Rv1405c	-1.0667	0.00619	NA	NA	NA	NA	NA	NA	-1.2021	0.00137
Rv1411c	lprG	NA	NA	NA	NA	NA	NA	NA	NA	1.0324	1.86e-05
Rv1460	Rv1460	1.44	0.0175	NA	NA	1.7096	0.00699	NA	NA	1.026	0.0414
Rv1461	Rv1461	1.3944	0.00122	NA	NA	1.4916	0.000331	NA	NA	1.1861	0.0012
Rv1462	Rv1462	2.0234	1.26e-06	NA	NA	1.5022	2.13e-05	NA	NA	1.3407	1.31e-05
Rv1463	Rv1463	2.0919	1.26e-06	NA	NA	1.5047	2.72e-05	NA	NA	1.5227	6.99e-06
Rv1464	csd	2.2836	1.26e-06	NA	NA	1.6163	2.26e-05	NA	NA	1.3657	2.72e-05
Rv1465	Rv1465	2.1321	3.52e-05	NA	NA	1.4359	0.00162	NA	NA	1.1018	0.00279
Rv1466	Rv1466	1.7392	6e-06	NA	NA	1.557	2.77e-05	NA	NA	1.4322	1.02e-05
Rv1467c	fadE15	1.1144	0.000347	NA	NA	1.2415	9.37e-05	1.03	0.000298	1.3974	9.73e-06
Rv1477	ripA	NA	NA	NA	NA	-1.0171	0.000338	NA	NA	NA	NA
Rv1481	Rv1481	NA	NA	NA	NA	NA	NA	NA	NA	-1.0296	0.000186
Rv1486c	Rv1486c	NA	NA	NA	NA	1.0731	3.09e-05	NA	NA	NA	NA
Rv1487	Rv1487	NA	NA	NA	NA	NA	NA	NA	NA	1.246	7.94e-05
Rv1489	Rv1489	NA	NA	NA	NA	1.1163	6.79e-05	NA	NA	1.1366	7.14e-06
Rv1524	Rv1524	NA	NA	NA	NA	-1.2084	0.0101	NA	NA	NA	NA
Rv1525	wbbL2	NA	NA	NA	NA	-1.1831	0.00929	NA	NA	NA	NA
Rv1528c	papA4	NA	NA	NA	NA	NA	NA	NA	NA	-1.4645	0.0472
Rv1536	ileS	NA	NA	NA	NA	NA	NA	1.3662	0.00145	1.1086	0.00319
Rv1542c	glbN	NA	NA	NA	NA	NA	NA	-1.6075	0.00414	-1.3834	0.0114
Rv1561	vapC11	NA	NA	NA	NA	1.3983	0.00133	1.092	0.00208	1.2687	0.000514
Rv1566c	Rv1566c	-1.0115	0.000351	NA	NA	NA	NA	NA	NA	NA	NA
Rv1571	Rv1571	NA	NA	NA	NA	NA	NA	NA	NA	-1.2858	0.021
Rv1574	Rv1574	1.0152	0.0247	NA	NA	NA	NA	NA	NA	NA	NA
Rv1576c	Rv1576c	1.6436	0.00704	-1.5051	0.0157	NA	NA	-1.7036	0.00643	NA	NA
Rv1577c	Rv1577c	NA	NA	-1.5129	0.0131	NA	NA	-1.7567	0.00464	NA	NA
Rv1578c	Rv1578c	2.2565	0.000241	NA	NA	2.667	3.56e-05	NA	NA	2.1872	6.87e-05
Rv1579c	Rv1579c	1.0544	0.0477	NA	NA	NA	NA	NA	NA	NA	NA
Rv1582c	Rv1582c	NA	NA	NA	NA	NA	NA	-1.0071	0.0312	NA	NA
Rv1591	Rv1591	NA	NA	-1.022	0.00118	-1.3047	0.000899	NA	NA	-1.3973	4.21e-05
Rv1592c	Rv1592c	-1.0948	0.00191	-1.2268	0.00082	-1.323	0.000395	-1.0051	0.00207	-1.4989	4.48e-05
Rv1593c	Rv1593c	NA	NA	-1.3538	0.00427	NA	NA	-1.3606	0.00246	NA	NA
Rv1598c	Rv1598c	NA	NA	NA	NA	1.2634	6.78e-05	NA	NA	1.1654	1.85e-05
Rv1608c	bcpB	NA	NA	NA	NA	NA	NA	1.0589	0.000129	1.1175	4.99e-05
Rv1613	trpA	NA	NA	NA	NA	-1.4444	0.00259	NA	NA	-1.2521	0.000312
Rv1614	lgt	NA	NA	NA	NA	-1.5205	0.000177	NA	NA	-1.3702	3.77e-05
Rv1617	pykA	NA	NA	NA	NA	NA	NA	1.0001	0.000253	NA	NA
Rv1622c	cydB	1.5166	0.000553	NA	NA	1.742	0.00014	NA	NA	1.8155	3.03e-05
Rv1623c	cydA	1.3289	0.000846	NA	NA	1.5997	8.73e-05	NA	NA	1.6001	4.81e-05
Rv1624c	Rv1624c	NA	NA	NA	NA	1.1051	0.000516	NA	NA	1.305	1.29e-05
Rv1632c	Rv1632c	NA	NA	NA	NA	NA	NA	NA	NA	-1.1946	2.76e-05
Rv1638A	Rv1638A	NA	NA	NA	NA	1.0129	0.000738	NA	NA	1.1503	4.38e-05
Rv1646	PE17	NA	NA	NA	NA	NA	NA	NA	NA	1.1236	1.69e-05
Rv1650	pheT	NA	NA	NA	NA	-1.1676	0.00106	NA	NA	NA	NA
Rv1653	argJ	1.0469	0.00327	NA	NA	NA	NA	NA	NA	NA	NA
Rv1654	argB	1.0386	0.00375	NA	NA	NA	NA	NA	NA	NA	NA
Rv1655	argD	1.2407	0.0012	NA	NA	NA	NA	NA	NA	NA	NA
Rv1662	pks8	NA	NA	NA	NA	NA	NA	-1.0752	0.0121	NA	NA
Rv1665	pks11	NA	NA	NA	NA	1.2791	0.00186	NA	NA	1.5009	0.000131
Rv1666c	cyp139	NA	NA	NA	NA	1.0602	0.00997	1.1735	0.00153	1.2215	0.000806
Rv1670	Rv1670	1.0613	0.0112	NA	NA	1.0983	0.013	NA	NA	1.2114	0.00214
Rv1678	Rv1678	NA	NA	NA	NA	NA	NA	NA	NA	-1.1096	0.00252
Rv1679	fadE16	NA	NA	NA	NA	-1.2185	0.00259	NA	NA	NA	NA
Rv1684	Rv1684	NA	NA	NA	NA	NA	NA	NA	NA	-1.2376	0.0126
Rv1685c	Rv1685c	-1.3521	0.0116	-1.447	0.00551	-1.4978	0.0276	-1.2351	0.00869	-2.3228	0.000269
Rv1686c	Rv1686c	-2.0863	0.0443	-2.1926	0.0223	NA	NA	-1.9299	0.0287	-3.0314	0.0074
Rv1687c	Rv1687c	-2.5027	0.0233	-2.4769	0.0166	NA	NA	-2.1146	0.0233	-3.2717	0.00414
Rv1690	lprJ	-1.02	0.0351	NA	NA	-1.8104	0.004	NA	NA	-1.7187	0.00129
Rv1706A	Rv1706A	NA	NA	-1.5968	0.00211	NA	NA	-1.5891	0.00187	NA	NA
Rv1709	scpA	NA	NA	NA	NA	-1.2142	0.0029	NA	NA	-1.1322	0.000189
Rv1712	cmk	NA	NA	NA	NA	-1.0061	0.0267	NA	NA	-1.0375	0.00459
Rv1713	engA	NA	NA	NA	NA	NA	NA	NA	NA	-1.0984	0.0123
Rv1719	Rv1719	NA	NA	NA	NA	NA	NA	NA	NA	-1.0244	0.0445
Rv1723	Rv1723	NA	NA	NA	NA	-1.2467	0.00407	NA	NA	NA	NA
Rv1754c	Rv1754c	NA	NA	NA	NA	-1.0902	0.00016	NA	NA	NA	NA
Rv1761c	Rv1761c	NA	NA	1.0067	0.00958	NA	NA	1.0783	0.00468	1.1773	0.00219
Rv1772	Rv1772	NA	NA	NA	NA	NA	NA	NA	NA	1.0009	0.000669
Rv1773c	Rv1773c	NA	NA	NA	NA	NA	NA	1.1064	0.000532	1.1735	0.000232
Rv1783	eccC5	1.0359	3.35e-05	NA	NA	1.1012	6.31e-06	NA	NA	1.1909	1.52e-06
Rv1790	PPE27	NA	NA	2.4555	0.000113	1.9509	0.00121	2.8182	2.19e-05	2.293	6.74e-05
Rv1791	PE19	NA	NA	1.2906	0.000134	1.7399	4.01e-06	1.3269	4.47e-05	1.5336	5.73e-06
Rv1792	esxM	NA	NA	NA	NA	1.0521	2.69e-05	NA	NA	1.1693	4.71e-06
Rv1794	Rv1794	NA	NA	NA	NA	NA	NA	1.1472	6.85e-05	NA	NA
Rv1795	eccD5	NA	NA	NA	NA	NA	NA	1.1004	4.32e-05	NA	NA
Rv1799	lppT	NA	NA	NA	NA	NA	NA	NA	NA	1.0296	0.0336
Rv1808	PPE32	NA	NA	1.1729	0.0183	NA	NA	1.1389	0.0153	1.313	0.00569
Rv1809	PPE33	NA	NA	1.563	7.25e-05	1.3829	0.000307	1.2698	0.000211	1.6541	1.11e-05
Rv1815	Rv1815	-1.0328	0.000433	NA	NA	NA	NA	NA	NA	NA	NA
Rv1846c	blaI	NA	NA	NA	NA	1.1454	0.000124	NA	NA	1.074	8.02e-05
Rv1854c	ndh	NA	NA	NA	NA	1.0795	0.000295	NA	NA	NA	NA
Rv1880c	cyp140	NA	NA	NA	NA	1.0363	9.37e-05	NA	NA	NA	NA
Rv1884c	rpfC	-1.3529	3.89e-05	NA	NA	-1.0397	0.000777	NA	NA	-1.0626	7.06e-05
Rv1885c	Rv1885c	NA	NA	NA	NA	NA	NA	1.0156	7.87e-05	NA	NA
Rv1907c	Rv1907c	1.6398	0.000233	1.2197	0.00127	1.8423	7.45e-05	1.3899	0.000298	1.7641	2.05e-05
Rv1908c	katG	1.6935	9.13e-06	1.228	0.000172	1.7164	3.48e-06	1.1901	9.66e-05	1.759	1.4e-06
Rv1909c	furA	1.8296	0.00024	1.2852	0.00193	2.4409	1.01e-05	NA	NA	2.062	1.31e-05
Rv1910c	Rv1910c	NA	NA	NA	NA	NA	NA	NA	NA	1.0425	0.000938
Rv1929c	Rv1929c	NA	NA	NA	NA	NA	NA	-1.0081	0.000576	NA	NA
Rv1940	ribA1	1.1096	0.0332	NA	NA	NA	NA	NA	NA	NA	NA
Rv1943c	mazE5	NA	NA	NA	NA	1.113	0.00381	NA	NA	NA	NA
Rv1954c	Rv1954c	2.4888	1.26e-06	1.5569	0.000113	3.0445	2.92e-07	1.3045	0.000211	2.7057	1.45e-07
Rv1955	higB	1.7306	0.000341	1.4454	0.00082	2.5852	6.24e-06	1.1776	0.00212	2.0182	1.49e-05
Rv1956	higA	1.2759	0.000347	1.2227	0.00035	1.7132	2.39e-05	1.1397	0.000353	1.4455	2.31e-05
Rv1957	Rv1957	NA	NA	NA	NA	1.5479	5.17e-05	1.0231	0.000814	1.1083	0.000247
Rv1958c	Rv1958c	NA	NA	NA	NA	1.2307	0.00452	NA	NA	NA	NA
Rv1959c	parE1	NA	NA	1.3323	3.15e-05	1.7101	6.24e-06	1.4356	9.14e-06	1.3722	6.99e-06
Rv1960c	parD1	NA	NA	NA	NA	1.5436	0.000282	NA	NA	1.3779	0.000104
Rv1968	mce3C	1.603	0.00725	NA	NA	NA	NA	NA	NA	NA	NA
Rv1978	Rv1978	NA	NA	NA	NA	1.0099	0.000895	NA	NA	1.2275	2.31e-05
Rv1986	Rv1986	NA	NA	NA	NA	NA	NA	1.253	0.000168	NA	NA
Rv1990c	Rv1990c	NA	NA	NA	NA	1.7737	1.15e-05	NA	NA	1.1731	0.000116
Rv1991A	mazE6	NA	NA	NA	NA	1.6961	2.6e-05	NA	NA	NA	NA
Rv1991c	mazF6	NA	NA	NA	NA	1.156	0.000444	NA	NA	NA	NA
Rv1993c	Rv1993c	NA	NA	NA	NA	1.2239	0.00271	NA	NA	NA	NA
Rv1996	Rv1996	NA	NA	-1.0351	0.0381	NA	NA	NA	NA	NA	NA
Rv1999c	Rv1999c	NA	NA	NA	NA	-2.5542	0.00207	NA	NA	NA	NA
Rv2000	Rv2000	NA	NA	1.0579	0.00183	NA	NA	1.1896	0.000466	1.0086	0.00116
Rv2018	Rv2018	NA	NA	1.0788	0.000684	NA	NA	1.0911	0.000381	NA	NA
Rv2025c	Rv2025c	NA	NA	1.3981	0.00785	2.1188	0.000772	NA	NA	NA	NA
Rv2026c	Rv2026c	NA	NA	1.1653	0.0128	NA	NA	1.199	0.00814	1.1014	0.0126
Rv2038c	Rv2038c	NA	NA	NA	NA	-1.3752	0.0082	NA	NA	-1.148	0.00979
Rv2056c	rpsN2	-1.6636	0.000248	-1.0724	0.00117	-2.2154	7.81e-05	NA	NA	-1.7461	3.99e-05
Rv2058c	rpmB2	-1.5928	0.00073	-1.1307	0.00254	-1.688	0.00274	NA	NA	-1.7252	0.000153
Rv2083	Rv2083	NA	NA	NA	NA	-1.0583	0.0144	NA	NA	-1.1525	0.000792
Rv2101	helZ	NA	NA	NA	NA	-1.0059	0.000341	NA	NA	NA	NA
Rv2102	Rv2102	NA	NA	NA	NA	-1.432	6.87e-05	NA	NA	NA	NA
Rv2107	PE22	NA	NA	NA	NA	NA	NA	-1.001	0.016	NA	NA
Rv2115c	mpa	1.1268	0.000108	1.0089	0.000217	1.5642	1.66e-06	NA	NA	1.6753	3.87e-07
Rv2124c	metH	NA	NA	1.1517	0.000139	1.11	6.92e-05	1.3654	1.83e-05	1.283	1.03e-05
Rv2137c	Rv2137c	NA	NA	NA	NA	1.1193	5.62e-05	NA	NA	1.2009	1.22e-05
Rv2169c	Rv2169c	NA	NA	NA	NA	1.3627	7.38e-06	NA	NA	1.2556	3.24e-06
Rv2230c	Rv2230c	NA	NA	NA	NA	-2.1809	0.0028	NA	NA	NA	NA
Rv2236c	cobD	NA	NA	NA	NA	NA	NA	NA	NA	-1.3166	0.000289
Rv2240c	Rv2240c	NA	NA	NA	NA	-1.2475	0.00373	NA	NA	NA	NA
Rv2244	acpM	NA	NA	NA	NA	-1.0895	0.000114	-1.0294	0.000138	-1.2469	1.22e-05
Rv2245	kasA	NA	NA	NA	NA	-1.4451	2.51e-05	NA	NA	-1.5022	5.73e-06
Rv2246	kasB	NA	NA	NA	NA	-1.0679	0.000358	NA	NA	-1.0762	8.82e-05
Rv2248	Rv2248	NA	NA	NA	NA	-1.041	0.0166	NA	NA	NA	NA
Rv2257c	Rv2257c	NA	NA	NA	NA	-1.1476	0.00271	NA	NA	-1.0588	0.000238
Rv2268c	cyp128	-1.01	0.0109	NA	NA	NA	NA	NA	NA	NA	NA
Rv2270	lppN	-1.0734	0.0224	NA	NA	-1.0475	0.0398	-1.0326	0.0114	-1.1604	0.00772
Rv2273	Rv2273	NA	NA	NA	NA	-1.2689	0.0159	NA	NA	-1.208	0.00926
Rv2274c	mazF8	NA	NA	NA	NA	NA	NA	NA	NA	-1.1081	0.0173
Rv2275	Rv2275	NA	NA	NA	NA	-1.2842	0.00264	NA	NA	NA	NA
Rv2276	cyp121	NA	NA	NA	NA	-1.0943	0.0152	NA	NA	NA	NA
Rv2277c	Rv2277c	NA	NA	NA	NA	-1.2833	0.00842	NA	NA	-1.4592	0.000611
Rv2282c	Rv2282c	NA	NA	NA	NA	NA	NA	NA	NA	-1.2351	0.0472
Rv2298	Rv2298	NA	NA	NA	NA	NA	NA	1.0341	4.32e-05	NA	NA
Rv2307c	Rv2307c	NA	NA	NA	NA	-1.7931	0.00838	NA	NA	NA	NA
Rv2316	uspA	NA	NA	NA	NA	1.2384	0.0256	1.1291	0.0255	NA	NA
Rv2323c	Rv2323c	1.0566	0.0137	NA	NA	1.9116	0.000299	NA	NA	1.2323	0.00229
Rv2324	Rv2324	NA	NA	NA	NA	1.0143	0.0283	NA	NA	NA	NA
Rv2350c	plcB	-1.0775	0.000347	NA	NA	NA	NA	NA	NA	-1.0793	8.72e-05
Rv2359	zur	NA	NA	NA	NA	1.2825	6.78e-05	NA	NA	1.0416	8.49e-05
Rv2387	Rv2387	NA	NA	1.1518	0.000401	NA	NA	1.4144	3.6e-05	NA	NA
Rv2391	sirA	NA	NA	NA	NA	-1.2695	4.3e-05	NA	NA	-1.4336	6.99e-06
Rv2392	cysH	NA	NA	NA	NA	-1.2111	0.0012	NA	NA	-1.0173	0.000495
Rv2393	che1	NA	NA	NA	NA	-1.0584	0.00305	NA	NA	-1.1947	8.54e-05
Rv2395B	aprB	NA	NA	NA	NA	NA	NA	NA	NA	1.125	1.69e-05
Rv2398c	cysW	NA	NA	NA	NA	-1.068	0.0252	NA	NA	NA	NA
Rv2417c	Rv2417c	NA	NA	NA	NA	NA	NA	NA	NA	-1.1404	0.00489
Rv2430c	PPE41	NA	NA	-1.4026	8.04e-05	-1.5714	0.000119	-1.2122	0.000129	-1.5335	1.16e-05
Rv2431c	PE25	NA	NA	-1.4793	3.44e-05	-1.4441	0.000136	-1.3718	3.02e-05	-1.568	6.18e-06
Rv2432c	Rv2432c	NA	NA	-1.5223	3.56e-05	-1.2991	0.00119	-1.4733	2.68e-05	-1.5675	1.22e-05
Rv2434c	Rv2434c	NA	NA	NA	NA	-1.0841	0.0319	NA	NA	NA	NA
Rv2436	rbsK	NA	NA	NA	NA	-1.2598	0.01	NA	NA	NA	NA
Rv2446c	Rv2446c	NA	NA	NA	NA	-1.9557	0.00172	NA	NA	NA	NA
Rv2460c	clpP2	1.0517	0.00204	NA	NA	1.0527	0.00142	NA	NA	NA	NA
Rv2461c	clpP1	1.1523	0.00137	NA	NA	1.2221	0.000513	NA	NA	1.1735	0.00034
Rv2466c	Rv2466c	NA	NA	NA	NA	NA	NA	NA	NA	-1.7764	0.0341
Rv2491	Rv2491	NA	NA	NA	NA	1.0853	0.0329	NA	NA	NA	NA
Rv2497c	bkdA	1.1501	0.000351	NA	NA	NA	NA	NA	NA	NA	NA
Rv2498c	citE	1.078	0.00191	NA	NA	NA	NA	NA	NA	NA	NA
Rv2500c	fadE19	NA	NA	NA	NA	NA	NA	-1.096	0.000114	NA	NA
Rv2501c	accA1	NA	NA	NA	NA	NA	NA	-1.1367	0.0015	NA	NA
Rv2557	Rv2557	1.0284	0.000625	NA	NA	1.7359	5.14e-06	NA	NA	1.4069	9.75e-06
Rv2558	Rv2558	NA	NA	NA	NA	1.3884	8.04e-05	NA	NA	1.2348	8.49e-05
Rv2590	fadD9	NA	NA	1.0634	0.00112	1.2577	0.000116	1.5594	2.68e-05	1.5615	1.02e-05
Rv2593c	ruvA	NA	NA	NA	NA	NA	NA	NA	NA	-1.3265	0.00771
Rv2594c	ruvC	NA	NA	NA	NA	-1.3864	0.004	NA	NA	NA	NA
Rv2599	Rv2599	NA	NA	NA	NA	-1.0748	0.0399	NA	NA	-1.5366	0.00189
Rv2600	Rv2600	NA	NA	-1.0605	0.00227	-1.0882	0.0152	-1.228	0.000661	-1.466	0.00026
Rv2601	speE	NA	NA	NA	NA	NA	NA	NA	NA	-1.0932	0.0062
Rv2604c	snoP	NA	NA	NA	NA	-1.0459	0.00621	NA	NA	NA	NA
Rv2620c	Rv2620c	NA	NA	NA	NA	-1.0961	0.0185	NA	NA	NA	NA
Rv2621c	Rv2621c	NA	NA	NA	NA	NA	NA	NA	NA	-1.035	0.00278
Rv2632c	Rv2632c	NA	NA	1.2691	0.000157	1.39	4.93e-05	1.2912	5.91e-05	1.6273	3.74e-06
Rv2633c	Rv2633c	NA	NA	1.6603	4.74e-05	1.7909	1.06e-05	1.7032	2.07e-05	1.9681	2.26e-06
Rv2638	Rv2638	NA	NA	NA	NA	1.1221	0.000777	NA	NA	1.0512	0.0002
Rv2641	cadI	1.7528	0.00288	1.2543	0.0175	3.4617	1.22e-05	NA	NA	2.2342	0.000177
Rv2642	Rv2642	1.2441	0.00211	NA	NA	2.4792	6.31e-06	NA	NA	1.3007	0.000577
Rv2643	arsC	NA	NA	NA	NA	1.3229	0.00769	NA	NA	NA	NA
Rv2650c	Rv2650c	NA	NA	-1.2318	0.0149	NA	NA	-1.445	0.00557	NA	NA
Rv2651c	Rv2651c	NA	NA	-1.7874	0.00183	NA	NA	-1.8577	0.00105	NA	NA
Rv2662	Rv2662	NA	NA	NA	NA	NA	NA	NA	NA	-1.2093	0.0484
Rv2680	Rv2680	NA	NA	NA	NA	-1.0349	0.000695	NA	NA	NA	NA
Rv2710	sigB	1.4357	0.00223	NA	NA	1.2966	0.00228	NA	NA	NA	NA
Rv2711	ideR	NA	NA	NA	NA	1.1858	3.91e-05	NA	NA	1.0253	7.71e-05
Rv2729c	Rv2729c	NA	NA	NA	NA	1.0565	0.0044	NA	NA	NA	NA
Rv2739c	Rv2739c	NA	NA	NA	NA	-1.6143	0.000817	NA	NA	-1.2407	0.000899
Rv2743c	Rv2743c	1.2474	0.000494	NA	NA	NA	NA	NA	NA	NA	NA
Rv2744c	35kd_ag	1.2362	0.00288	NA	NA	NA	NA	NA	NA	NA	NA
Rv2745c	clgR	1.3233	0.0234	NA	NA	NA	NA	NA	NA	NA	NA
Rv2761c	hsdS	NA	NA	NA	NA	-1.353	0.0437	NA	NA	-1.3526	0.00951
Rv2763c	dfrA	NA	NA	NA	NA	NA	NA	NA	NA	-1.0274	0.002
Rv2766c	Rv2766c	NA	NA	NA	NA	NA	NA	1.206	5.47e-05	NA	NA
Rv2771c	Rv2771c	NA	NA	NA	NA	NA	NA	-1.2259	0.000782	NA	NA
Rv2779c	Rv2779c	NA	NA	NA	NA	NA	NA	-1.0603	0.000168	-1.3897	2.6e-05
Rv2780	ald	NA	NA	-2.1597	0.00772	-1.3452	0.0465	-2.1191	0.0052	-2.0477	0.00403
Rv2781c	Rv2781c	NA	NA	-2.1845	0.00572	-2.0341	0.0105	-2.1138	0.00424	-2.579	0.000883
Rv2782c	pepR	NA	NA	NA	NA	-1.1739	0.00135	NA	NA	-1.0764	0.000151
Rv2787	Rv2787	NA	NA	NA	NA	-1.101	0.000457	NA	NA	NA	NA
Rv2801A	mazE9	NA	NA	NA	NA	1.3545	0.00488	NA	NA	NA	NA
Rv2808	Rv2808	NA	NA	NA	NA	-1.4946	0.0107	NA	NA	NA	NA
Rv2816c	Rv2816c	-1.1789	0.0139	-1.1014	0.0133	-1.3914	0.0237	NA	NA	-1.4204	0.00229
Rv2817c	Rv2817c	NA	NA	NA	NA	-1.3215	0.00426	NA	NA	-1.425	0.000174
Rv2818c	Rv2818c	NA	NA	1.2423	8.6e-05	1.5126	2.69e-05	1.0562	0.000168	1.6133	2.43e-06
Rv2819c	Rv2819c	NA	NA	1.0305	0.000692	1.4092	9.52e-05	NA	NA	1.2466	5.2e-05
Rv2820c	Rv2820c	1.0001	0.00211	1.665	2.66e-05	1.9251	1.06e-05	1.8716	4.95e-06	2.1287	5.87e-07
Rv2821c	Rv2821c	1.1581	0.000347	1.701	9.78e-06	2.1653	1.11e-06	1.8285	3.3e-06	2.2741	1.21e-07
Rv2822c	Rv2822c	1.4446	0.000347	1.7477	4.21e-05	2.27	6.24e-06	1.9338	1.11e-05	2.4702	3.91e-07
Rv2823c	Rv2823c	1.1139	0.000347	1.5008	2.66e-05	1.8523	3.16e-06	1.8117	3.3e-06	2.0886	1.97e-07
Rv2824c	Rv2824c	NA	NA	1.2892	0.00026	1.6947	4.22e-05	1.7961	8.63e-06	2.0903	8.56e-07
Rv2826c	Rv2826c	NA	NA	NA	NA	NA	NA	-1.0016	0.035	NA	NA
Rv2830c	vapB22	NA	NA	NA	NA	NA	NA	-1.0632	0.00992	NA	NA
Rv2832c	ugpC	NA	NA	NA	NA	NA	NA	NA	NA	-1.0524	0.0289
Rv2833c	ugpB	NA	NA	NA	NA	-1.4173	0.022	NA	NA	NA	NA
Rv2838c	rbfA	1.0838	0.000528	NA	NA	NA	NA	NA	NA	NA	NA
Rv2846c	efpA	-1.1329	0.00134	-1.2816	0.000498	-1.0762	0.00134	-1.137	0.000776	-1.254	0.000167
Rv2850c	Rv2850c	NA	NA	NA	NA	NA	NA	-1.1422	0.000881	NA	NA
Rv2859c	Rv2859c	NA	NA	NA	NA	-1.1287	0.0128	NA	NA	NA	NA
Rv2865	relF	NA	NA	NA	NA	1.4143	0.00219	NA	NA	NA	NA
Rv2866	relG	NA	NA	NA	NA	1.5654	0.000695	NA	NA	NA	NA
Rv2873	mpt83	2.0175	0.016	2.5225	0.00459	2.7426	0.00263	2.7158	0.00187	2.5838	0.00161
Rv2874	dipZ	NA	NA	1.7208	0.0408	NA	NA	2.2167	0.0093	1.5434	0.043
Rv2875	mpt70	2.824	0.0128	3.4988	0.00347	3.071	0.00744	3.7841	0.00145	3.3326	0.00208
Rv2876	Rv2876	NA	NA	1.0919	0.0429	NA	NA	1.418	0.00891	NA	NA
Rv2877c	Rv2877c	NA	NA	1.6567	0.0367	NA	NA	2.1722	0.00736	NA	NA
Rv2887	Rv2887	NA	NA	NA	NA	-1.9186	0.00673	NA	NA	NA	NA
Rv2924c	fpg	NA	NA	NA	NA	-1.7988	0.0128	NA	NA	NA	NA
Rv2933	ppsC	NA	NA	NA	NA	NA	NA	-1.0156	0.000153	NA	NA
Rv2945c	lppX	NA	NA	NA	NA	NA	NA	NA	NA	-1.0015	7.58e-05
Rv2946c	pks1	NA	NA	NA	NA	-1.1247	0.00184	NA	NA	-1.2813	8.49e-05
Rv2947c	pks15	NA	NA	NA	NA	NA	NA	NA	NA	-1.137	6.09e-05
Rv2966c	Rv2966c	NA	NA	NA	NA	NA	NA	NA	NA	-1.5919	0.000788
Rv2971	Rv2971	NA	NA	NA	NA	NA	NA	1.1207	0.000107	1.0801	7.53e-05
Rv2972c	Rv2972c	NA	NA	1.2258	0.000286	NA	NA	1.34	6.81e-05	1.1168	0.000226
Rv2973c	recG	NA	NA	NA	NA	-1.0083	0.0141	NA	NA	NA	NA
Rv2974c	Rv2974c	NA	NA	NA	NA	-1.242	0.0198	NA	NA	NA	NA
Rv2980	Rv2980	NA	NA	NA	NA	-1.227	0.0277	NA	NA	-1.2444	0.0077
Rv3000	Rv3000	NA	NA	2.1489	0.000498	1.8248	0.00261	2.6237	6.49e-05	2.1844	0.000163
Rv3001c	ilvC	1.0425	0.0129	1.7924	0.000419	1.7471	0.000294	2.101	6.49e-05	2.0228	4.14e-05
Rv3002c	ilvN	1.1161	0.0106	1.9849	0.000266	1.9821	0.000162	2.3335	3.6e-05	2.3735	1.31e-05
Rv3003c	ilvB1	NA	NA	1.6435	0.000166	1.4469	0.000199	2.0263	1.69e-05	1.9009	9.67e-06
Rv3012c	gatC	NA	NA	NA	NA	-1.0099	0.0178	NA	NA	-1.1279	0.00249
Rv3016	lpqA	NA	NA	NA	NA	1.459	4.74e-05	NA	NA	NA	NA
Rv3019c	esxR	NA	NA	NA	NA	1.246	0.0277	NA	NA	NA	NA
Rv3039c	echA17	NA	NA	NA	NA	NA	NA	NA	NA	-1.2355	0.00298
Rv3040c	Rv3040c	NA	NA	NA	NA	NA	NA	NA	NA	-1.0827	0.00803
Rv3059	cyp136	NA	NA	NA	NA	1.476	1.66e-06	NA	NA	1.3051	1.52e-06
Rv3065	mmr	NA	NA	NA	NA	1.2259	0.00952	NA	NA	NA	NA
Rv3079c	Rv3079c	NA	NA	NA	NA	1.081	0.00177	NA	NA	NA	NA
Rv3087	Rv3087	1.2189	0.00938	NA	NA	1.8593	0.000774	NA	NA	1.4944	0.000978
Rv3088	tgs4	NA	NA	NA	NA	1.3402	0.00246	NA	NA	NA	NA
Rv3089	fadD13	NA	NA	NA	NA	1.0691	0.00378	NA	NA	NA	NA
Rv3109	moaA1	NA	NA	NA	NA	-1.5188	0.0344	NA	NA	-1.5506	0.0178
Rv3122	Rv3122	NA	NA	NA	NA	NA	NA	-1.1166	0.000469	NA	NA
Rv3139	fadE24	-1.0078	0.0496	-1.5943	0.00572	NA	NA	-1.1573	0.0182	-1.2751	0.00791
Rv3140	fadE23	NA	NA	-1.1258	0.00572	NA	NA	NA	NA	NA	NA
Rv3151	nuoG	NA	NA	NA	NA	-1.0297	0.0362	NA	NA	NA	NA
Rv3154	nuoJ	NA	NA	NA	NA	-1.5699	0.013	-1.051	0.0108	-1.2313	0.00453
Rv3155	nuoK	NA	NA	NA	NA	-1.193	0.0115	NA	NA	-1.1216	0.00124
Rv3156	nuoL	NA	NA	NA	NA	NA	NA	NA	NA	-1.3409	0.00406
Rv3157	nuoM	NA	NA	NA	NA	-1.2497	0.0215	-1.0742	0.00998	-1.1308	0.0065
Rv3158	nuoN	NA	NA	NA	NA	-1.0772	0.00854	NA	NA	NA	NA
Rv3180c	Rv3180c	NA	NA	NA	NA	1.27	0.000651	NA	NA	1.1371	0.000231
Rv3181c	Rv3181c	1.1594	0.00156	NA	NA	1.7206	8.81e-05	NA	NA	1.6792	1.85e-05
Rv3182	Rv3182	NA	NA	NA	NA	NA	NA	-1.3338	0.00145	NA	NA
Rv3188	Rv3188	NA	NA	NA	NA	2.2638	1.04e-06	NA	NA	1.4094	1.53e-05
Rv3189	Rv3189	NA	NA	NA	NA	1.1435	0.000234	NA	NA	NA	NA
Rv3197	Rv3197	NA	NA	NA	NA	1.4041	1.88e-06	1.0562	3.02e-05	1.4406	6.93e-07
Rv3218	Rv3218	NA	NA	NA	NA	NA	NA	1.0577	0.00168	NA	NA
Rv3229c	desA3	-2.1152	0.0278	NA	NA	NA	NA	NA	NA	-2.2782	0.00989
Rv3230c	Rv3230c	-1.8439	0.00416	NA	NA	NA	NA	-1.1466	0.0236	-2.0987	0.000899
Rv3241c	Rv3241c	NA	NA	NA	NA	1.0834	2.69e-05	NA	NA	1.2666	2.43e-06
Rv3249c	Rv3249c	NA	NA	NA	NA	NA	NA	1.0345	0.0393	NA	NA
Rv3270	ctpC	NA	NA	NA	NA	NA	NA	NA	NA	-2.2204	0.0232
Rv3271c	Rv3271c	NA	NA	NA	NA	NA	NA	NA	NA	-1.2264	0.0243
Rv3288c	usfY	NA	NA	NA	NA	1.1384	0.00207	NA	NA	NA	NA
Rv3290c	lat	NA	NA	NA	NA	1.0243	0.0082	NA	NA	NA	NA
Rv3304	Rv3304	NA	NA	NA	NA	NA	NA	NA	NA	-1.1134	0.000154
Rv3307	deoD	NA	NA	NA	NA	-1.0486	0.00291	NA	NA	-1.011	0.000413
Rv3308	pmmB	NA	NA	NA	NA	-1.3499	0.00533	NA	NA	-1.2176	0.00115
Rv3312A	Rv3312A	NA	NA	1.0349	0.000401	NA	NA	1.298	3.02e-05	1.1558	3.99e-05
Rv3330	dacB1	NA	NA	NA	NA	-1.0508	0.00125	NA	NA	NA	NA
Rv3332	nagA	-1.4014	0.00277	NA	NA	-1.2934	0.00776	NA	NA	-2.2376	4.14e-05
Rv3334	Rv3334	NA	NA	NA	NA	1.682	0.00576	NA	NA	NA	NA
Rv3340	metC	NA	NA	-1.0174	0.0294	-1.4269	0.00673	NA	NA	-1.3299	0.00345
Rv3342	Rv3342	1.0115	0.00793	NA	NA	NA	NA	NA	NA	NA	NA
Rv3354	Rv3354	NA	NA	1.3384	0.00045	1.3169	0.0013	1.4394	0.000138	1.5058	6.32e-05
Rv3355c	Rv3355c	NA	NA	NA	NA	NA	NA	NA	NA	1.0718	3.99e-05
Rv3357	relJ	NA	NA	NA	NA	1.9849	0.0012	NA	NA	1.2049	0.0169
Rv3358	relK	NA	NA	NA	NA	1.3771	0.0196	NA	NA	NA	NA
Rv3371	Rv3371	-1.4694	0.00185	NA	NA	-1.0328	0.0218	NA	NA	NA	NA
Rv3375	amiD	NA	NA	NA	NA	-1.1214	0.00454	NA	NA	NA	NA
Rv3393	iunH	NA	NA	NA	NA	-1.2896	0.0157	NA	NA	-1.1347	0.0102
Rv3397c	phyA	NA	NA	NA	NA	NA	NA	NA	NA	-1.0414	0.0198
Rv3406	Rv3406	NA	NA	NA	NA	1.1877	0.0402	NA	NA	NA	NA
Rv3415c	Rv3415c	NA	NA	NA	NA	NA	NA	1.0281	0.0139	NA	NA
Rv3417c	groEL1	NA	NA	NA	NA	NA	NA	NA	NA	-1.4665	0.00172
Rv3418c	groES	NA	NA	NA	NA	NA	NA	-1.2747	0.0186	-1.8595	0.00157
Rv3447c	eccC4	NA	NA	NA	NA	-1.0102	0.0146	NA	NA	NA	NA
Rv3455c	truA	NA	NA	NA	NA	-1.0069	0.00948	NA	NA	NA	NA
Rv3457c	rpoA	NA	NA	NA	NA	NA	NA	1.1114	0.00272	NA	NA
Rv3463	Rv3463	-2.0267	0.0477	NA	NA	NA	NA	NA	NA	-2.2054	0.0198
Rv3469c	mhpE	NA	NA	NA	NA	NA	NA	-1.0144	0.0066	NA	NA
Rv3473c	bpoA	NA	NA	NA	NA	NA	NA	NA	NA	-1.1847	0.00887
Rv3486	Rv3486	NA	NA	NA	NA	NA	NA	1.0429	0.00134	NA	NA
Rv3487c	lipF	NA	NA	1.0398	0.000739	1.0858	0.000302	1.451	2.68e-05	1.4834	8.49e-06
Rv3493c	Rv3493c	NA	NA	NA	NA	-1.3834	0.0142	NA	NA	NA	NA
Rv3494c	mce4F	NA	NA	NA	NA	-1.1148	0.0389	NA	NA	NA	NA
Rv3506	fadD17	NA	NA	NA	NA	-1.6427	0.00614	NA	NA	NA	NA
Rv3517	Rv3517	NA	NA	NA	NA	NA	NA	NA	NA	-1.4492	0.0111
Rv3518c	cyp142	NA	NA	NA	NA	NA	NA	NA	NA	-1.5053	0.00497
Rv3522	ltp4	NA	NA	NA	NA	-1.0332	0.0136	NA	NA	-1.0043	0.00203
Rv3525c	Rv3525c	NA	NA	NA	NA	-1.237	0.0294	NA	NA	NA	NA
Rv3549c	Rv3549c	NA	NA	-1.334	0.00788	NA	NA	-1.2092	0.00942	-1.177	0.0131
Rv3550	echA20	NA	NA	NA	NA	NA	NA	NA	NA	-2.0311	0.00808
Rv3560c	fadE30	NA	NA	NA	NA	-1.3443	0.0307	NA	NA	NA	NA
Rv3571	kshB	NA	NA	NA	NA	NA	NA	NA	NA	-1.1774	0.0109
Rv3577	Rv3577	NA	NA	NA	NA	-1.6735	0.000777	NA	NA	-1.0524	0.00297
Rv3578	arsB2	NA	NA	NA	NA	-1.1942	0.00611	NA	NA	NA	NA
Rv3587c	Rv3587c	NA	NA	NA	NA	-1.0575	0.000935	NA	NA	NA	NA
Rv3589	mutY	NA	NA	NA	NA	-1.3274	0.00881	NA	NA	NA	NA
Rv3597c	lsr2	NA	NA	NA	NA	1.0276	0.000457	NA	NA	NA	NA
Rv3609c	folE	1.0953	0.000248	NA	NA	1.2245	9.31e-05	NA	NA	NA	NA
Rv3614c	espD	NA	NA	NA	NA	NA	NA	1.1146	7.87e-05	1.1397	3.04e-05
Rv3615c	espC	NA	NA	1.0802	0.00026	1.0909	8.04e-05	1.3126	2.47e-05	1.2701	1.22e-05
Rv3616c	espA	NA	NA	1.2964	4.74e-05	1.2385	2.51e-05	1.5638	4.95e-06	1.4687	3.05e-06
Rv3647c	Rv3647c	NA	NA	NA	NA	-1.6851	0.00142	NA	NA	-1.2051	0.00131
Rv3652	PE_PGRS60	NA	NA	NA	NA	NA	NA	NA	NA	-1.0858	0.048
Rv3660c	Rv3660c	-1.083	0.0131	NA	NA	-1.5122	0.0105	NA	NA	-1.3982	0.00157
Rv3664c	dppC	NA	NA	NA	NA	-1.0174	0.0226	NA	NA	NA	NA
Rv3704c	gshA	NA	NA	1.08	0.000363	1.0824	0.000513	1.3326	3.02e-05	1.2392	3.03e-05
Rv3710	leuA	1.1857	0.000347	1.7482	1.01e-05	1.848	1.88e-06	1.9834	2.96e-06	2.1442	2.33e-07
Rv3711c	dnaQ	NA	NA	1.2784	4.21e-05	1.4173	1.06e-05	1.4703	6.39e-06	1.7439	3.91e-07
Rv3712	Rv3712	NA	NA	NA	NA	-1.3347	0.0073	NA	NA	NA	NA
Rv3713	cobQ2	NA	NA	NA	NA	-1.0055	0.0128	NA	NA	NA	NA
Rv3718c	Rv3718c	NA	NA	NA	NA	-1.1869	0.00621	NA	NA	NA	NA
Rv3734c	tgs2	NA	NA	NA	NA	1.035	8.46e-05	NA	NA	NA	NA
Rv3750c	Rv3750c	NA	NA	NA	NA	1.0318	0.000274	NA	NA	NA	NA
Rv3763	lpqH	-1.0439	0.00112	NA	NA	NA	NA	NA	NA	NA	NA
Rv3765c	tcrX	NA	NA	NA	NA	NA	NA	NA	NA	1.0037	0.000603
Rv3766	Rv3766	1.2189	0.00167	1.5871	0.000201	1.9754	3.56e-05	1.9514	2.07e-05	2.0941	4.89e-06
Rv3767c	Rv3767c	1.1626	0.000233	1.7577	5.69e-06	1.9707	1.1e-06	2.1177	5.2e-07	2.3163	8.09e-08
Rv3771c	Rv3771c	NA	NA	NA	NA	-1.0268	0.0213	NA	NA	NA	NA
Rv3778c	Rv3778c	NA	NA	NA	NA	NA	NA	1.2331	3.43e-05	1.0107	0.000102
Rv3787c	Rv3787c	NA	NA	NA	NA	-1.5259	0.00198	NA	NA	NA	NA
Rv3792	aftA	NA	NA	NA	NA	-1.042	0.00813	NA	NA	-1.0472	0.000664
Rv3793	embC	NA	NA	NA	NA	NA	NA	NA	NA	-1.0447	0.000142
Rv3794	embA	NA	NA	NA	NA	-1.2885	0.000128	NA	NA	-1.1577	2.64e-05
Rv3795	embB	NA	NA	NA	NA	-1.4116	4.28e-05	NA	NA	-1.1177	1.96e-05
Rv3807c	Rv3807c	NA	NA	NA	NA	NA	NA	NA	NA	-1.3533	0.000461
Rv3822	Rv3822	NA	NA	1.0915	0.000401	1.2789	4.3e-05	1.3267	3.96e-05	1.64	2.77e-06
Rv3824c	papA1	NA	NA	1.6584	0.00082	1.6086	0.000523	1.6625	0.000466	1.818	0.000111
Rv3825c	pks2	NA	NA	1.638	0.00035	1.5457	0.000201	1.8808	5.47e-05	1.8485	2.72e-05
Rv3833	Rv3833	NA	NA	NA	NA	NA	NA	NA	NA	-1.2628	0.0251
Rv3850	Rv3850	NA	NA	NA	NA	NA	NA	1.066	0.000138	NA	NA
Rv3859c	gltB	NA	NA	NA	NA	1.0073	3.56e-05	NA	NA	1.1147	8.49e-06
Rv3865	espF	NA	NA	NA	NA	1.1584	5.88e-05	NA	NA	NA	NA
Rv3872	PE35	NA	NA	NA	NA	1.411	1.66e-06	NA	NA	NA	NA
Rv3873	PPE68	NA	NA	NA	NA	1.0242	5.06e-05	NA	NA	NA	NA
Rv3881c	espB	NA	NA	NA	NA	1.0688	1.72e-05	NA	NA	1.0807	5.99e-06
Rv3892c	PPE69	NA	NA	1.1333	0.00915	NA	NA	1.2236	0.00424	NA	NA
Rv3909	Rv3909	NA	NA	NA	NA	-1.0287	0.000148	NA	NA	NA	NA
Rv3920c	Rv3920c	NA	NA	NA	NA	-1.4822	0.00698	NA	NA	-1.6858	0.000185
Rv3921c	Rv3921c	NA	NA	NA	NA	-1.7872	6.63e-05	NA	NA	-1.7762	9.67e-06
Rv3922c	Rv3922c	NA	NA	NA	NA	-1.5346	0.000153	NA	NA	-1.5772	3.79e-06
Rv3923c	rnpA	NA	NA	NA	NA	-1.1512	0.000715	NA	NA	NA	NA

## Sheet: Table S5
Supplementary Table 5 (Table S5): Functional clustering of DEGs under BDQ, LYN1D, LYN3D, BDQ_LYN1D and BDQ_LYN3D
Category	Term	Counts	P-Value	Genes
LYN1D_UP
GOTERM_BP_DIRECT	GO:0051607~defense response to virus	7	9.06e-09	RV2821C, RV2820C, RV2823C, RV2822C, RV2818C, RV2819C, RV2824C
KEGG_PATHWAY	mtu00540:Lipopolysaccharide biosynthesis	3	0.000656	RV0115, RV0114, RV0113
KEGG_PATHWAY	mtu00290:Valine, leucine and isoleucine biosynthesis	4	0.000776	RV3002C, RV3001C, RV3710, RV3003C
KEGG_PATHWAY	mtu01210:2-Oxocarboxylic acid metabolism	5	0.00147	RV1131, RV3002C, RV3001C, RV3710, RV3003C
LYN1D_DOWN
GOTERM_BP_DIRECT	GO:0033539~fatty acid beta-oxidation using acyl-CoA dehydrogenase	4	0.000777	RV0972C, RV0975C, RV3139, RV3140
LYN3D_UP
GOTERM_BP_DIRECT	GO:0051607~defense response to virus	6	2.84e-06	RV2821C, RV2820C, RV2823C, RV2822C, RV2818C, RV2824C
KEGG_PATHWAY	mtu00540:Lipopolysaccharide biosynthesis	3	0.00144	RV0115, RV0114, RV0113
KEGG_PATHWAY	mtu00290:Valine, leucine and isoleucine biosynthesis	4	0.00248	RV3002C, RV3001C, RV3710, RV3003C
KEGG_PATHWAY	mtu01210:2-Oxocarboxylic acid metabolism	5	0.00653	RV1131, RV3002C, RV3001C, RV3710, RV3003C
KEGG_PATHWAY	mtu01230:Biosynthesis of amino acids	8	0.0082	RV1131, RV3002C, RV3001C, RV3710, RV1885C, RV2124C, RV3003C, RV1617
LYN3D_DOWN
GOTERM_BP_DIRECT	GO:0033539~fatty acid beta-oxidation using acyl-CoA dehydrogenase	4	0.00172	RV2500C, RV0972C, RV0975C, RV3139
BDQ_UP
KEGG_PATHWAY	mtu01210:2-Oxocarboxylic acid metabolism	8	5.3e-06	RV1131, RV3002C, RV3001C, RV3710, RV1653, RV2497C, RV1654, RV1655
BDQ_LYN1D_UP
GOTERM_BP_DIRECT	GO:0051607~defense response to virus	7	2.68e-06	RV2821C, RV2820C, RV2823C, RV2822C, RV2818C, RV2819C, RV2824C
GOTERM_BP_DIRECT	GO:0045892~negative regulation of transcription, DNA-templated	10	7.35e-05	RV0967, RV1909C, RV0757, RV3358, RV2711, RV0981, RV2359, RV2866, RV1846C, RV1956
KEGG_PATHWAY	mtu00290:Valine, leucine and isoleucine biosynthesis	4	0.00773	RV3002C, RV3001C, RV3710, RV3003C
KEGG_PATHWAY	mtu00540:Lipopolysaccharide biosynthesis	3	0.00317	RV0115, RV0114, RV0113
BDQ_LYN1D_DOWN
GOTERM_BP_DIRECT	GO:0006412~translation	13	7.38e-05	RV3012C, RV2058C, RV0707, RV0706, RV0705, RV0715, RV0704, RV0703, RV0714, RV0702, RV0701, RV0700, RV2056C
GOTERM_BP_DIRECT	GO:0042773~ATP synthesis coupled electron transport	5	0.000368	RV0083, RV3155, RV3158, RV3157, RV3151
GOTERM_BP_DIRECT	GO:0071555~cell wall organization	10	0.00453	RV3792, RV3330, RV3920C, RV3794, RV3795, RV1169C, RV1477, RV3712, RV3713, RV0838
KEGG_PATHWAY	mtu03010:Ribosome	12	0.000552	RV0704, RV0715, RV0714, RV0703, RV0702, RV0701, RV0700, RV2056C, RV2058C, RV0707, RV0706, RV0705
BDQ_LYN3D_UP
GOTERM_BP_DIRECT	GO:0051607~defense response to virus	7	6.02e-07	RV2821C, RV2820C, RV2823C, RV2822C, RV2818C, RV2819C, RV2824C
GOTERM_BP_DIRECT	GO:0045892~negative regulation of transcription, DNA-templated	7	0.00323	RV1773C, RV1909C, RV2711, RV0981, RV2359, RV1846C, RV1956
KEGG_PATHWAY	mtu00540:Lipopolysaccharide biosynthesis	3	0.00284	RV0115, RV0114, RV0113
KEGG_PATHWAY	mtu00290:Valine, leucine and isoleucine biosynthesis	4	0.0066	RV3002C, RV3001C, RV3710, RV3003C
BDQ_LYN3D_DOWN
GOTERM_BP_DIRECT	GO:0042773~ATP synthesis coupled electron transport	4	0.0043	RV0083, RV3156, RV3155, RV3157

## Sheet: Table S6
Supplementary Table 6 (Table S6): Significantly different expressed regulators and their regulated DEGs identified under the combination of BDQ+LYN1D or BDQ+LYN3D
Locus	Name	BDQ-LYN1D-logFC	BDQ-LYN3D-logFC	path	pathway name	Regulator
Rv1846c	blaI	1.1454	1.074	mtu01501	beta-Lactam resistance	blaI
Rv1623c	cydA	1.5997	1.6001	mtu00190	Oxidative phosphorylation	blaI
Rv1622c	cydB	1.742	1.8155	mtu00190	Oxidative phosphorylation	blaI
Rv3921c	Rv3921c	-1.7872	-1.7762	mtu02024	Quorum sensing	blaI
Rv3494c	mce4F	-1.1148	NA	mtu02010	ABC transporters	csoR
Rv3795	embB	-1.4116	-1.1177	mtu00572	Arabinogalactan biosynthesis - Mycobacterium	csoR
Rv3340	metC	-1.4269	-1.3299	mtu00270	Cysteine and methionine metabolism	csoR
Rv3713	cobQ2	-1.0055	NA	mtu00550	Peptidoglycan biosynthesis	csoR
Rv3712	Rv3712	-1.3347	NA	mtu00550	Peptidoglycan biosynthesis	csoR
Rv1381	pyrC	-1.4095	NA	mtu00240	Pyrimidine metabolism	csoR
Rv0714	rplN	-1.0938	NA	mtu03010	Ribosome	csoR
Rv0715	rplX	-1.4521	NA	mtu03010	Ribosome	csoR
Rv1464	csd	1.6163	1.3657	mtu00450	Selenocompound metabolism	csoR
Rv2398c	cysW	-1.068	NA	mtu00920	Sulfur metabolism	csoR
Rv0838	lpqR	-1.0429	NA	mtu01502	Vancomycin resistance	csoR
Rv1908c	katG	1.7164	1.759	mtu00360	Phenylalanine metabolism	furA
Rv3087	Rv3087	1.8593	1.4944	mtu00561	Glycerolipid metabolism	higA
Rv3088	tgs4	1.3402	NA	mtu00561	Glycerolipid metabolism	higA
Rv0147	Rv0147	1.0782	1.0639	mtu00010	Glycolysis / Gluconeogenesis	higA, ideR
Rv0670	end	1.2509	1.0937	mtu03410	Base excision repair	ideR
Rv0169	mce1A	-1.2709	NA	mtu02010	ABC transporters	mprA
Rv0171	mce1C	-1.2483	-1.2799	mtu02010	ABC transporters	mprA
Rv0172	mce1D	-1.3298	-1.1374	mtu02010	ABC transporters	mprA
Rv0173	lprK	-1.0268	-1.0196	mtu02010	ABC transporters	mprA, Rv1719
Rv0174	mce1F	-1.0965	-1.0071	mtu02010	ABC transporters	mprA, Rv1719
Rv2601	speE	NA	-1.0932	mtu00270	Cysteine and methionine metabolism	mprA
Rv0118c	oxcA	2.1366	2.2166	mtu00630	Glyoxylate and dicarboxylate metabolism	mprA
Rv1344	mbtL	1.4165	1.0714	mtu01100	Metabolic pathways	mprA, ideR
Rv2781c	Rv2781c	-2.0341	-2.579	mtu00910	Nitrogen metabolism	mprA
Rv0350	dnaK	NA	-1.3845	mtu03018	RNA degradation	mprA
Rv3417c	groEL1	NA	-1.4665	mtu03018	RNA degradation	mprA
Rv0981	mprA	1.4069	1.402	mtu02020	Two-component system	mprA
Rv0982	mprB	1.1587	NA	mtu02020	Two-component system	mprA
Rv2833c	ugpB	-1.4173	NA	mtu02010	ABC transporters	phoR
Rv2832c	ugpC	NA	-1.0524	mtu02010	ABC transporters	phoR
Rv2780	ald	-1.3452	-2.0477	mtu00250	Alanine, aspartate and glutamate metabolism	phoR
Rv1650	pheT	-1.1676	NA	mtu00970	Aminoacyl-tRNA biosynthesis	phoR
Rv3397c	phyA	NA	-1.0414	mtu00906	Carotenoid biosynthesis	phoR
Rv1131	prpC	3.7245	3.6404	mtu00020	Citrate cycle (TCA cycle)	phoR, ideR, mprA
Rv0186	bglS	NA	-1.0776	mtu00460	Cyanoamino acid metabolism	phoR
Rv0848	cysK2	NA	-1.3	mtu00270	Cysteine and methionine metabolism	phoR
Rv2124c	metH	1.11	1.283	mtu00270	Cysteine and methionine metabolism	phoR
Rv0112	gca	NA	1.3942	mtu00051	Fructose and mannose metabolism	phoR, ideR
Rv0211	pckA	1.5224	1.4999	mtu00010	Glycolysis / Gluconeogenesis	phoR
Rv0467	icl1	2.2813	2.4573	mtu00630	Glyoxylate and dicarboxylate metabolism	phoR, mprA
Rv0113	gmhA	1.1457	1.3898	mtu00540	Lipopolysaccharide biosynthesis	phoR, ideR
Rv0114	gmhB	1.3228	1.2402	mtu00540	Lipopolysaccharide biosynthesis	phoR, ideR
Rv0115	hddA	1.1431	1.2008	mtu00540	Lipopolysaccharide biosynthesis	phoR, ideR
Rv2244	acpM	-1.0895	-1.2469	mtu01100	Metabolic pathways	phoR
Rv1284	canA	1.7124	1.6689	mtu00910	Nitrogen metabolism	phoR, ideR
Rv1854c	ndh	1.0795	NA	mtu00190	Oxidative phosphorylation	phoR
Rv3151	nuoG	-1.0297	NA	mtu00190	Oxidative phosphorylation	phoR, csoR
Rv3158	nuoN	-1.0772	NA	mtu00190	Oxidative phosphorylation	phoR, csoR
Rv3154	nuoJ	-1.5699	-1.2313	mtu00190	Oxidative phosphorylation	phoR, mprA
Rv3155	nuoK	-1.193	-1.1216	mtu00190	Oxidative phosphorylation	phoR, mprA
Rv3156	nuoL	-1.0994	-1.3409	mtu00190	Oxidative phosphorylation	phoR, mprA
Rv3157	nuoM	-1.2497	-1.1308	mtu00190	Oxidative phosphorylation	phoR, mprA
Rv0468	fadB2	1.3873	1.6037	mtu00360	Phenylalanine metabolism	phoR, csoR, mprA
Rv1130	prpD	3.5227	3.557	mtu00640	Propanoate metabolism	phoR, ideR, mprA
Rv1286	cysN	1.412	1.2459	mtu00230	Purine metabolism	phoR, ideR
Rv0440	groEL2	-1.0599	-1.7663	mtu03018	RNA degradation	phoR
Rv2392	cysH	-1.2111	-1.0173	mtu00920	Sulfur metabolism	phoR, ideR, mprA
Rv2391	sirA	-1.2695	-1.4336	mtu00920	Sulfur metabolism	phoR, ideR, mprA
Rv0553	menC	-1.2369	NA	mtu00130	Ubiquinone and other terpenoid-quinone biosynthesis	Rv1719
Rv3230c	Rv3230c	-1.2728	-2.0987	mtu01040	Biosynthesis of unsaturated fatty acids	zur
Rv3229c	desA3	-1.6769	-2.2782	mtu01040	Biosynthesis of unsaturated fatty acids	zur
Rv2058c	rpmB2	-1.688	-1.7252	mtu03010	Ribosome	zur
Rv2056c	rpsN2	-2.2154	-1.7461	mtu03010	Ribosome	zur
Rv3019c	esxR	1.246	NA	mtu05152	Tuberculosis	zur, ideR
Rv3020c	esxS	-1.0442	NA	mtu05152	Tuberculosis	zur, ideR
